# Supplementary material
Source: PubMed Central journal article supplement (PMC2896495)

# Supporting Information

## Enantioselective Synthesis of 3,4-Chromanediones *via* Asymmetric Rearrangement of 3-Allyloxyflavones

J.-C. Marié, Y. Xiong, G. K. Min, A. R. Yeager,  
S. E. Schaus, and J. A. Porco, Jr.  
Center for Chemical Methodology and Library Development (CMLD-BU)  
Boston University  
590 Commonwealth Avenue  
Boston, MA 02215, USA

E-mail: [seschaus@bu.edu](mailto:seschaus@bu.edu); [porco@bu.edu](mailto:porco@bu.edu)

Tohru Taniguchi and Nina Berova  
Department of Chemistry, Columbia University  
3000 Broadway MC 3114, New York, NY 10027, USA

## *Table of Contents*

|              |                                                                                                                                    |             |
|--------------|------------------------------------------------------------------------------------------------------------------------------------|-------------|
| <b>I.</b>    | <b>General Information.</b>                                                                                                        | <b>S-3</b>  |
| <b>II.</b>   | <b>Experimental Procedures and Characterization Data for the Preparation of Chalcones 54-60.</b>                                   | <b>S-3</b>  |
| <b>III.</b>  | <b>Experimental Procedures and Characterization Data for the Preparation of Epoxides 61-67.</b>                                    | <b>S-6</b>  |
| <b>IV.</b>   | <b>Experimental Procedures and Characterization Data for the Preparation of 3-Hydroxy-2-Phenylchroman-4-ones 68-74.</b>            | <b>S-8</b>  |
| <b>V.</b>    | <b>Experimental Procedures for the Preparation of 3-Hydroxyflavones.</b>                                                           | <b>S-11</b> |
| <b>VI.</b>   | <b>Experimental Procedures and Characterization Data for the Preparation of Allyloxy-Flavones 5b, 11-21 and 73-77.</b>             | <b>S-11</b> |
| <b>VII.</b>  | <b>Experimental Procedures and Characterization Data for Sc(OTf)<sub>3</sub>-(<i>R</i>)-Pybox-mediated Rearrangement Products.</b> | <b>S-17</b> |
| <b>VIII.</b> | <b>Mechanistic Studies.</b>                                                                                                        |             |
|              | ▪ <b>Deuterium labeling and Crossover Experiment.</b>                                                                              | <b>S-24</b> |
|              | ▪ <b>UV/Fluorescence Studies.</b>                                                                                                  | <b>S-27</b> |
| <b>IX.</b>   | <b>X-ray Crystal Structure Data.</b>                                                                                               | <b>S-31</b> |
| <b>X.</b>    | <b>Circular Dichroism (CD) Data and Calculations.</b>                                                                              | <b>S-35</b> |
| <b>XI.</b>   | <b>Representative Spectral Data: <sup>1</sup>H and <sup>13</sup>C NMR of Select Compounds.</b>                                     | <b>S-51</b> |
| <b>XII.</b>  | <b>Representative Spectral Data: Chiral HPLC Traces of Select Compounds.</b>                                                       | <b>S-81</b> |

## I. General Information

$^1\text{H}$  NMR spectra were recorded on a 400 MHz spectrometer at ambient temperature with  $\text{CDCl}_3$  as the solvent otherwise stated.  $^{13}\text{C}$  NMR spectra were recorded on a 100 MHz spectrometer at ambient temperature with complete proton decoupling using  $\text{CDCl}_3$  as the solvent otherwise stated. Chemical shifts for characterized compounds are reported in parts per million relative to  $\text{CDCl}_3$  ( $^1\text{H}$ ,  $\delta$  7.26;  $^{13}\text{C}$ ,  $\delta$  77.00). Data for  $^1\text{H}$  NMR are reported as follows: chemical shift, multiplicity (app = apparent, par obsc = partially obscure, br = broad, ovrlp = overlapping, s = singlet, d = doublet, t = triplet, q = quartet, m = multiplet), integration and coupling constants. Infrared spectra were recorded on FT-IR spectrophotometer. Optical rotations were recorded on a digital polarimeter at 589 nm and are recorded as  $[\alpha]_D$  (concentration in grams/100 mL solvent). Enantiomeric ratio values were determined by chiral HPLC analysis performed on a high pressure liquid chromatography (HPLC) instrument equipped with a quaternary pump using a ChiralPak AD-H or Chiralcel OD-H column (15 cm x 4.6 mm) with UV detection monitored at 254 nm or 280 nm. High-resolution mass spectra were obtained in the Boston University Mass Spectrometry Laboratory using a Q-TOF mass spectrometer. Analytical thin layer chromatography was performed on 0.25 mm silica gel 60-F plates. Visualization was accomplished with UV light and aqueous ceric ammonium molybdate solution or basic aqueous potassium permanganate solution. UV and CD spectra of **7b** and **25** were measured using a spectrophotometer and spectropolarimeter, respectively as acetonitrile solutions of under an ambient temperature. Solution data were corrected by solvent (acetonitrile) spectra obtained using the same experimental condition. CD data were normalized to er = 100:0 according to the results obtained by chiral HPLC analysis. Flash chromatography was performed using 200-400 mesh silica gel. Yields refer to chromatographically and spectroscopically pure materials, unless otherwise stated. 1,2-Dichloroethane was dried over 4Å molecular sieves. Scandium trifluoromethylsulfonate (scandium triflate) was stored in a dry atmosphere box. All reactions were performed in flame-dried glassware under an argon atmosphere unless otherwise noted.

## II. Experimental Procedures and Characterization Data for the Preparation of Chalcones 54-60.

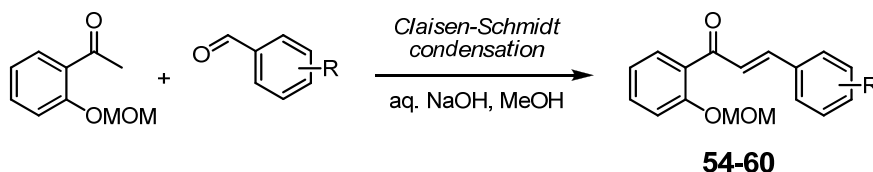

**General Procedure:** To a solution of 2'-methoxymethoxyacetophenone<sup>S1</sup> (500 mg, 2.77 mmol, 1.0 equiv) in methanol (5 mL) was added at 0 °C an aqueous solution of sodium hydroxide (30 % wt, 0.70 mL, 8.32 mmol, 3.0 equiv). After stirring for 30 minutes, a solution of the benzaldehyde derivative (3.33 mmol, 1.2 equiv) in methanol (3 mL) was added dropwise *via* cannula. The reaction was slowly warmed up to ambient temperature and stirred overnight. The mixture was then diluted with  $\text{Et}_2\text{O}$  (15 mL) and

<sup>S1</sup> Topolski, M. *J. Org. Chem.* **1995**, *60*, 5588-5594.

washed twice with a saturated aqueous solution of ammonium chloride (2 x 15 mL). After separation of the layers and reextraction of the aqueous phase in Et<sub>2</sub>O (15 mL), the organic layers were combined and washed with brine (20 mL). The ethereal phase was dried over MgSO<sub>4</sub> and concentrated *in vacuo* to afford a crude mixture that was purified by column chromatography on silica gel.

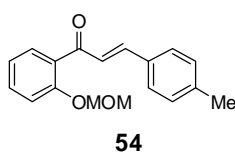

**(E)-1-(2-(Methoxymethoxy)phenyl)-3-p-tolylprop-2-en-1-one (54):**

The title compound **54** was synthesized according to the general procedure using *p*-tolualdehyde and was purified by silica gel chromatography (petroleum ether : ethyl acetate = 90 : 10) affording a bright yellow oil (778 mg, 2.75 mmol, 99 %). <sup>1</sup>H NMR (400 MHz, CDCl<sub>3</sub>) δ 7.57 (dd, *J* = 7.7, 1.8 Hz, 1H), 7.57 (d, *J* = 15.9 Hz, 1H), 7.49-7.41 (m, 3H), 7.29 (d, *J* = 15.9 Hz, 1H), 7.22-7.18 (m, 3H), 7.09 (tt, *J* = 7.5, 0.8 Hz, 1H), 5.23 (s, 2H), 3.47 (s, 3H), 2.38 (s, 3H). <sup>13</sup>C NMR (100 MHz, CDCl<sub>3</sub>) δ 193.5, 155.4, 143.9, 140.8, 132.4, 132.2, 130.5, 129.9, 129.6 (2C), 128.3 (2C), 126.2, 121.9, 115.3, 94.9, 56.4, 21.5. IR  $\nu_{\max}$  (film): 2951, 2921, 1658, 1600, 1482, 1452, 1328, 1201, 1153, 1082, 1025, 982, 814 cm<sup>-1</sup>. HRMS (ESI+) *m/z* calculated for C<sub>18</sub>H<sub>18</sub>NaO<sub>3</sub> 305.1154 found 305.1160 (M+Na).

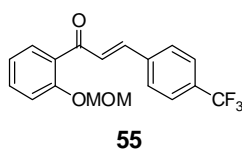

**(E)-1-(2-(Methoxymethoxy)phenyl)-3-(4-(trifluoromethyl)phenyl)prop-2-en-1-one (55):**

The title compound **55** was synthesized according to the general procedure using *p*-CF<sub>3</sub>-benzaldehyde and was purified by silica gel chromatography (petroleum ether : ethyl acetate = 90 : 10) to afford a bright yellow oil (607 mg, 1.80 mmol, 65 %). <sup>1</sup>H NMR (400 MHz, CDCl<sub>3</sub>) δ 7.70-7.65 (m, 4H), 7.63 (dd, *J* = 7.7, 1.8 Hz, 1H), 7.62 (d, *J* = 15.6 Hz, 1H), 7.50-7.45 (m, 1H), 7.44 (d, *J* = 15.9 Hz, 1H), 7.22 (d, *J* = 8.3 Hz, 1H), 7.11 (t, *J* = 7.5 Hz, 1H), 5.26 (s, 2H), 3.48 (s, 3H). <sup>13</sup>C NMR (100 MHz, CDCl<sub>3</sub>) δ 192.4, 155.6, 140.9, 138.4, 133.0, 132.0-131.0 (q, *J* = 32.7 Hz, 1C), 130.2, 129.6, 129.0, 128.3 (2C), 125.8-125.7 (q, *J* = 3.8 Hz, 2C), 127.8-119.7 (q, *J* = 272.2 Hz, 1C), 121.7, 115.1, 94.8, 56.3. IR  $\nu_{\max}$  (film): 2957, 2829, 1664, 1608, 1482, 1453, 1323, 1207, 1165, 1125, 1068, 981, 832 cm<sup>-1</sup>. HRMS (ESI+) *m/z* calculated for C<sub>18</sub>H<sub>15</sub>F<sub>3</sub>NaO<sub>3</sub> 359.0871 found 359.0865 (M+Na).

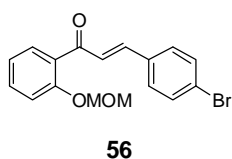

**(E)-3-(4-Bromophenyl)-1-(2-(methoxymethoxy)phenyl)prop-2-en-1-one (56):**

The brominated chalcone **56** (920 mg, 2.65 mmol, 96 %) was synthesized according to the general procedure using *p*-bromobenzaldehyde and was obtained as a bright yellow oil after silica gel chromatography (petroleum ether : ethyl acetate = 90 : 10). <sup>1</sup>H NMR (400 MHz, CDCl<sub>3</sub>) δ 7.59 (dd, *J* = 7.6, 1.8 Hz, 1H), 7.53 (d, *J* = 15.4, 1H), 7.55-7.50 (m, 1H), 7.52 (d, *J* = 8.8 Hz, 1H), 7.48-7.41 (m, 2H), 7.43 (d, *J* = 8.3 Hz, 1H), 7.34 (d, *J* = 16.0 Hz, 1H), 7.20 (d, *J* = 8.4 Hz, 1H), 7.10 (tt, *J* = 7.5, 0.8 Hz, 1H), 5.24 (s, 2H), 3.47 (s, 3H). <sup>13</sup>C NMR (100 MHz, CDCl<sub>3</sub>) δ 192.8, 155.5, 141.9, 133.8, 132.8, 132.1 (2C), 130.0, 129.9, 129.6 (2C), 127.4, 124.5, 121.9, 115.2, 94.8, 56.4. IR  $\nu_{\max}$  (film): 2955, 2826, 1659, 1604, 1586, 1486, 1452, 1325, 1203, 1153, 1073, 980, 818 cm<sup>-1</sup>. HRMS (ESI+) *m/z* calculated for C<sub>17</sub>H<sub>16</sub>BrO<sub>3</sub> 347.0283 found 347.0273 (M+H).

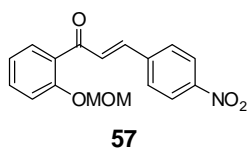

**(E)-1-(2-(Methoxymethoxy)phenyl)-3-(4-nitrophenyl)prop-2-en-1-one (57):**

Chalcone **57** was synthesized according to the general procedure using *p*-NO<sub>2</sub>-benzaldehyde and was purified by silica gel chromatography (petroleum ether : ethyl acetate = 85 : 15) affording bright yellow needles (633 mg, 2.02 mmol, 73 %). M.p. (petroleum ether : CH<sub>2</sub>Cl<sub>2</sub>) = 125-126 °C. <sup>1</sup>H NMR (400 MHz, CDCl<sub>3</sub>)

δ 8.25 (d, *J* = 8.8 Hz, 2H), 7.72 (d, *J* = 8.9 Hz, 2H), 7.64 (dd, *J* = 7.7, 1.8 Hz, 1H), 7.64 (d, *J* = 15.9 Hz, 1H), 7.51 (d, *J* = 16.4 Hz, 1H), 7.51-7.45 (m, 1H), 7.21 (d, *J* = 8.4 Hz, 1H), 7.11 (t, *J* = 7.5 Hz, 1H), 5.26 (s, 2H), 3.48 (s, 3H). <sup>13</sup>C NMR (100 MHz, CDCl<sub>3</sub>) δ 192.0, 155.8, 148.3, 141.3, 139.5, 133.4, 130.5, 130.3, 129.4, 128.7 (2C), 124.1 (2C), 122.1, 115.2, 94.9, 56.5. IR ν<sub>max</sub> (film): 2955, 2925, 2851, 1661, 1598, 1518, 1482, 1453, 1344, 1206, 1154, 1110, 1082, 979, 855 cm<sup>-1</sup>. HRMS (ESI+) *m/z* calculated for C<sub>17</sub>H<sub>15</sub>NNaO<sub>5</sub> 336.0848 found 336.0879 (M+Na).

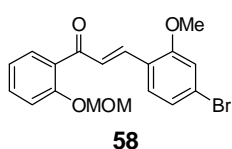

**(E)-3-(4-Bromo-2-methoxyphenyl)-1-(2-(methoxymethoxy)phenyl)prop-2-en-1-one (58):**

The compound **58** was prepared according to the general procedure using 4-bromo-2-methoxybenzaldehyde and was purified by silica gel chromatography

(petroleum ether : ethyl acetate = 90 : 10) to afford a yellow oil (961 mg, 2.55 mmol, 92 %). <sup>1</sup>H NMR (400 MHz, CDCl<sub>3</sub>) δ 7.83 (d, *J* = 16.1 Hz, 1H), 7.57 (dd, *J* = 7.6, 1.8 Hz, 1H), 7.46-7.42 (m, 1H), 7.42 (d, *J* = 8.3 Hz, 1H), 7.38 (d, *J* = 16.0 Hz, 1H), 7.20 (d, *J* = 8.0 Hz, 1H), 7.11 (dd, *J* = 8.2, 1.8 Hz, 1H), 7.09 (dt, *J* = 7.5, 0.7 Hz, 1H), 7.06 (d, *J* = 1.8 Hz, 1H), 5.23 (s, 2H), 3.87 (s, 3H), 3.47 (s, 3H). <sup>13</sup>C NMR (100 MHz, CDCl<sub>3</sub>) δ 193.3, 158.8, 155.4, 137.7, 132.4, 130.3, 130.0, 129.6, 127.8, 125.1, 123.9, 123.0, 121.9, 115.2, 114.8, 94.8, 56.2, 55.7. IR ν<sub>max</sub> (film): 2963, 2934, 2851, 1673, 1599, 1586, 1484, 1452, 1246, 1154, 1083, 985, 853 cm<sup>-1</sup>. HRMS (ESI+) *m/z* calculated for C<sub>18</sub>H<sub>17</sub>BrNaO<sub>4</sub> 399.0208 found 399.0246 (M+Na).

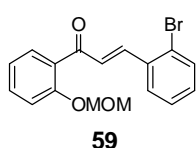

**(E)-3-(2-Bromophenyl)-1-(2-(methoxymethoxy)phenyl)prop-2-en-1-one (59):**

The *ortho*-brominated chalcone **59** was synthesized following the general procedure using 2-bromobenzaldehyde. After purification by silica gel chromatography (petroleum ether : ethyl acetate = 90 : 10), the product was obtained as a yellow gum

(843 mg, 2.43 mmol, 88 %). <sup>1</sup>H NMR (400 MHz, CDCl<sub>3</sub>) δ 7.95 (d, *J* = 15.9 Hz, 1H), 7.67 (dd, *J* = 7.8, 1.6 Hz, 1H), 7.60 (dd, *J* = 7.6, 1.8 Hz, 1H), 7.59 (dd, *J* = 8.0, 1.3 Hz, 1H), 7.44 (ddd, *J* = 8.4, 7.4, 1.8 Hz, 1H), 7.32 (t, *J* = 7.3 Hz, 1H), 7.28 (d, *J* = 15.9 Hz, 1H), 7.23-7.18 (m, 2H), 7.09 (dt, *J* = 7.5, 1.0 Hz, 1H), 5.24 (s, 2H), 3.46 (s, 3H). <sup>13</sup>C NMR (100 MHz, CDCl<sub>3</sub>) δ 192.8, 155.5, 141.7, 134.9, 133.4, 132.8, 131.1, 130.1, 129.7, 129.4, 127.6 (2C), 125.7, 121.9, 115.1, 94.8, 56.3. IR ν<sub>max</sub> (film): 3068, 2954, 2826, 1659, 1601, 1482, 1465, 1452, 1440, 1324, 1281, 1232, 1153, 1110, 1082, 977 cm<sup>-1</sup>. HRMS (ESI+) *m/z* calculated for C<sub>17</sub>H<sub>15</sub>BrNaO<sub>3</sub> 369.0102 found 369.0121 (M+Na).

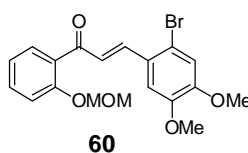

**(E)-3-(2-Bromo-4,5-dimethoxyphenyl)-1-(2-(methoxymethoxy)phenyl)prop-2-en-1-one (60):**

The title chalcone **60** was prepared according to the general procedure using 6-bromoveratraldehyde and was purified by silica gel chromatography (petroleum

ether : ethyl acetate = 75 : 25) to afford a yellow solid (983 mg, 2.41 mmol, 87 %). M.p. (petroleum ether : Et<sub>2</sub>O) = 94-95 °C. <sup>1</sup>H NMR (400 MHz, CDCl<sub>3</sub>) δ 7.86 (d, *J* = 15.9 Hz, 1H), 7.56 (d, *J* = 7.6 Hz, 1H), 7.44 (t, *J* = 7.8 Hz, 1H), 7.20 (d, *J* = 8.4 Hz, 1H), 7.16 (s, 1H), 7.14 (d, *J* = 15.9 Hz, 1H), 7.10 (t, *J* = 7.5 Hz, 1H), 7.05 (s, 1H), 5.23 (s, 2H), 3.90 (s, 3H), 3.89 (s, 3H), 3.46 (s, 3H). <sup>13</sup>C NMR (100 MHz, CDCl<sub>3</sub>) δ 193.3, 155.3, 151.3, 148.5, 142.3, 132.5, 130.1, 129.9, 127.4, 126.7, 121.9, 117.9, 115.6, 115.1, 109.2, 94.9, 56.4, 56.2, 55.9. IR  $\nu_{\text{max}}$  (film): 3001, 2952, 2842, 1653, 1597, 1505, 1438, 1389, 1292, 1264, 1204, 1165, 1025, 981, 848 cm<sup>-1</sup>. HRMS (ESI+) *m/z* calculated for C<sub>19</sub>H<sub>19</sub>BrNaO<sub>5</sub> 429.0314 found 429.0296 (M+Na).

### III. Experimental Procedures and Characterization Data for the Preparation of Epoxides (61-67).

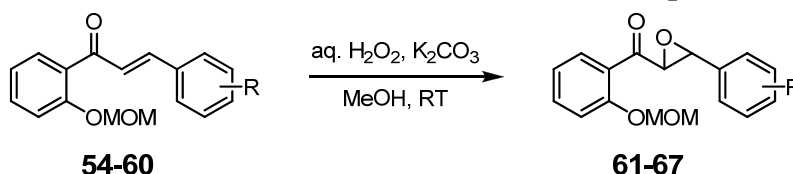

**General Procedure:**<sup>S2</sup> To a solution of the *p*-methyl chalcone **54** (205 mg, 0.73 mmol, 1.0 equiv) in methanol (15 mL) was added K<sub>2</sub>CO<sub>3</sub> (301.0 mg, 2.18 mmol, 3.0 equiv) at room temperature in one portion followed by an aqueous solution of hydrogen peroxide (30 % wt, 0.59 mL, 5.81 mmol, 8.0 equiv), over 15 minutes. After completion of the reaction (monitored by TLC, 10 minutes), the mixture was diluted with Et<sub>2</sub>O (15 mL) and washed twice with a saturated aqueous solution of ammonium chloride (2 x 15 mL). After extraction of the combined aqueous layers in Et<sub>2</sub>O (15 mL), the organic layers were combined and washed with brine (20 mL). The ethereal phase was dried over MgSO<sub>4</sub> and concentrated *in vacuo* to afford a crude mixture that was purified by silica gel chromatography.

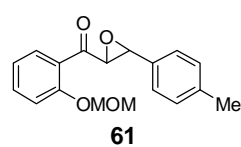

#### (2-(Methoxymethoxy)phenyl)(3-*p*-tolylloxiran-2-yl)methanone (**61**):

Epoxide **61** was isolated as white needles (210 mg, 0.70 mmol, 97 %) after silica gel chromatography (petroleum ether : ethyl acetate = 85 : 15). M.p. (petroleum ether : CH<sub>2</sub>Cl<sub>2</sub>) = 91-92 °C. <sup>1</sup>H NMR (400 MHz, CDCl<sub>3</sub>) δ 7.80 (dd, *J* = 7.8, 1.7 Hz, 1H), 7.47 (ddd, *J* = 8.5, 7.3, 1.8 Hz, 1H), 7.25 (d, *J* = 8.0 Hz, 2H), 7.19 (d, *J* = 8.0 Hz, 2H), 7.15 (d, *J* = 8.4 Hz, 1H), 7.08 (dt, *J* = 7.7, 0.9 Hz, 1H), 4.93 (d, *J* = 7.0 Hz, 1H), 4.85 (d, *J* = 7.0 Hz, 1H), 4.29 (d, *J* = 1.9 Hz, 1H), 3.98 (d, *J* = 1.7 Hz, 1H), 3.11 (s, 3H), 2.36 (s, 3H). <sup>13</sup>C NMR (100 MHz, CDCl<sub>3</sub>) δ 194.9, 157.1, 138.7, 134.6, 133.3, 130.4, 129.2 (2C), 126.4, 125.7 (2C), 121.9, 114.3, 94.3, 64.8, 59.8, 56.2, 21.2. IR  $\nu_{\text{max}}$  (film): 2924, 2851, 1682, 1598, 1482, 1456, 1281, 1215, 1154, 1083, 979, 896, 822 cm<sup>-1</sup>. HRMS (ESI+) *m/z* calculated for C<sub>18</sub>H<sub>18</sub>NaO<sub>4</sub> 321.1103 found 321.1108 (M+Na).

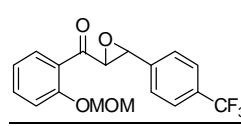

#### (2-(Methoxymethoxy)phenyl)(3-(4-(trifluoromethyl)phenyl)oxiran-2-yl)methanone (**62**):

<sup>S2</sup> LeBlanc, R.; Dickson, J.; Brown, T.; Stewart, M.; Pati, H. N.; VanDerveer, D.; Arman, H.; Harris, J.; Pennington, W.; Holt, H. L.; Lee, M. *Bioorg. Med. Chem.* **2005**, *13*, 6025-6034.

Epoxyketone **62** was synthesized starting from the chalcone **55** (293 mg, 0.87 mmol) and was purified by silica gel chromatography (petroleum ether : ethyl acetate = 85 : 15) to afford a white solid (295 mg, 0.84 mmol, 96 %). M.p. (petroleum ether : CH<sub>2</sub>Cl<sub>2</sub>) = 101-102 °C. <sup>1</sup>H NMR (400 MHz, CDCl<sub>3</sub>) δ 7.82 (dd, *J* = 7.7, 1.8 Hz, 1H), 7.67 (d, *J* = 8.3 Hz, 2H), 7.53-7.47 (m, 3H), 7.16 (d, *J* = 8.4 Hz, 1H), 7.11 (t, *J* = 7.5 Hz, 1H), 4.97 (d, *J* = 7.0 Hz, 1H), 4.86 (d, *J* = 7.0 Hz, 1H), 4.29 (d, *J* = 1.9 Hz, 1H), 4.09 (d, *J* = 1.8 Hz, 1H), 3.11 (s, 3H). <sup>13</sup>C NMR (100 MHz, CDCl<sub>3</sub>) δ 194.1, 157.1, 140.6, 134.9, 131.4-130.4 (q, *J* = 32.5 Hz, 1C), 130.5, 126.2, 126.0 (2C), 125.6-125.5 (q, *J* = 3.8 Hz, 2C), 127.9-119.8 (q, *J* = 272.0 Hz, 1C), 122.1, 114.5, 94.5, 64.6, 58.8, 56.2. IR  $\nu_{\max}$  (film): 2959, 2829, 1685, 1598, 1482, 1457, 1326, 1282, 1165, 1125, 1068, 1018, 979, 834 cm<sup>-1</sup>. HRMS (ESI+) *m/z* calculated for C<sub>18</sub>H<sub>15</sub>F<sub>3</sub>NaO<sub>4</sub> 375.0820 found 375.0830 (M+Na).

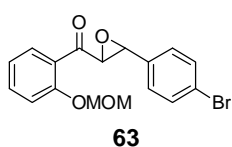

**(3-(4-Bromophenyl)oxiran-2-yl)(2-(methoxymethoxy)phenyl)methanone (63):**

The title compound **63** was synthesized starting from the chalcone **56** (330.0 mg, 0.95 mmol) and was purified on silica gel (petroleum ether : ethyl acetate = 90 : 10) affording a white solid (339 mg, 0.93 mmol, 98 %). M.p. (petroleum ether : CH<sub>2</sub>Cl<sub>2</sub>) = 108-109 °C. <sup>1</sup>H NMR (400 MHz, CDCl<sub>3</sub>) δ 7.80 (dd, *J* = 7.8, 1.8 Hz, 1H), 7.52 (d, *J* = 8.5 Hz, 2H), 7.50-7.46 (m, 1H), 7.25 (d, *J* = 8.6 Hz, 2H), 7.16 (d, *J* = 8.4 Hz, 1H), 7.09 (t, *J* = 7.5 Hz, 1H), 4.97 (d, *J* = 7.0 Hz, 1H), 4.88 (d, *J* = 7.0 Hz, 1H), 4.26 (d, *J* = 1.9 Hz, 1H), 3.98 (d, *J* = 1.8 Hz, 1H), 3.14 (s, 3H). <sup>13</sup>C NMR (100 MHz, CDCl<sub>3</sub>) δ 194.3, 157.1, 135.5, 134.8, 131.7 (2C), 130.5, 127.3 (2C), 126.3, 122.7, 122.0, 114.4, 94.4, 64.5, 59.1, 56.2. IR  $\nu_{\max}$  (film): 2954, 2904, 2853, 1681, 1597, 1481, 1455, 1282, 1153, 1082, 979, 895, 825 cm<sup>-1</sup>. HRMS (ESI+) *m/z* calculated for C<sub>17</sub>H<sub>15</sub>BrNaO<sub>4</sub> 385.0051 found 385.0102 (M+Na).

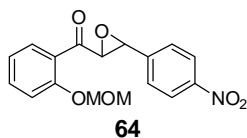

**(2-(Methoxymethoxy)phenyl)(3-(4-nitrophenyl)oxiran-2-yl)methanone (64):**

Epoxyketone **64** was synthesized starting from the chalcone **57** (748 mg, 2.39 mmol) and was purified by silica gel chromatography (petroleum ether : ethyl acetate = 65 : 35) to afford a light yellow solid (717 mg, 2.18 mmol, 91 %). M.p. (petroleum ether : CH<sub>2</sub>Cl<sub>2</sub>) = 166-169 °C. <sup>1</sup>H NMR (400 MHz, CDCl<sub>3</sub>) δ 8.27 (d, *J* = 8.6 Hz, 2H), 7.81 (dd, *J* = 7.8, 1.7 Hz, 1H), 7.56 (d, *J* = 8.7 Hz, 2H), 7.51 (td, *J* = 7.4, 1.8, 0.6 Hz, 1H), 7.17 (d, *J* = 8.4 Hz, 1H), 7.11 (t, *J* = 7.5 Hz, 1H), 4.98 (d, *J* = 6.9 Hz, 1H), 4.90 (d, *J* = 6.9 Hz, 1H), 4.31 (dd, *J* = 1.8, 0.6 Hz, 1H), 4.14 (d, *J* = 1.8 Hz, 1H), 3.16 (s, 3H). <sup>13</sup>C NMR (100 MHz, CDCl<sub>3</sub>) δ 193.8, 157.1, 148.1, 143.8, 135.1, 130.6, 126.5 (2C), 126.2, 123.9 (2C), 122.2, 114.6, 94.6, 64.4, 58.4, 56.4. IR  $\nu_{\max}$  (film): 2935, 2852, 1683, 1598, 1522, 1482, 1457, 1347, 1282, 1154, 1112, 1083, 978, 836 cm<sup>-1</sup>. HRMS (ESI+) *m/z* calculated for C<sub>17</sub>H<sub>15</sub>NNaO<sub>6</sub> 352.0797 found 352.0826 (M+Na).

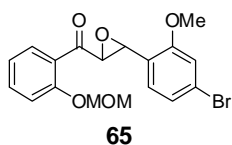

**(3-(4-Bromo-2-methoxyphenyl)oxiran-2-yl)(2-(methoxymethoxy)phenyl)methanone (65):**

The title compound **65** was synthesized starting from the chalcone **58** (800 mg, 2.12 mmol) and was purified on silica gel (petroleum ether : ethyl acetate = 85 : 15), affording a white solid (832 mg, 2.12 mmol, 99 %). M.p. (petroleum ether : CH<sub>2</sub>Cl<sub>2</sub>) = 104-105 °C. <sup>1</sup>H NMR (400 MHz, CDCl<sub>3</sub>) δ 7.80 (dd, *J* = 7.7, 1.8 Hz, 1H), 7.48 (ddd, *J* = 8.4, 7.3, 1.8 Hz, 1H), 7.16 (d, *J* = 8.4 Hz, 1H), 7.10 (s, 2H), 7.09 (t, *J* = 7.77 Hz, 1H), 7.04 (br s, 1H), 5.02 (d, *J* = 6.9 Hz, 1H), 4.93 (d,

$J = 6.9$  Hz, 1H), 4.34 (d,  $J = 1.9$  Hz, 1H), 4.20 (dd,  $J = 1.9, 0.4$  Hz, 1H), 3.82 (s, 3H), 3.18 (s, 3H).  $^{13}\text{C}$  NMR (100 MHz,  $\text{CDCl}_3$ )  $\delta$  194.9, 158.7, 157.1, 134.6, 130.4, 126.6, 126.4, 124.0, 123.9, 122.7, 122.0, 114.5, 113.9, 94.4, 64.0, 56.1, 55.7, 55.0. IR  $\nu_{\text{max}}$  (film): 2930, 2852, 1683, 1596, 1490, 1456, 1398, 1281, 1252, 1154, 1083, 1018, 981, 853  $\text{cm}^{-1}$ . HRMS (ESI+)  $m/z$  calculated for  $\text{C}_{18}\text{H}_{17}\text{BrNaO}_5$  415.0157 found 415.0178 (M+Na).

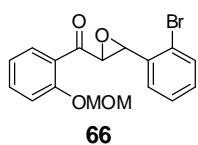

**(3-(2-Bromophenyl)oxiran-2-yl)(2-(methoxymethoxy)phenyl)methanone (66):**

Starting from the chalcone **59** (895 mg, 2.58 mmol), the epoxide **66** was isolated after column chromatography on silica gel (petroleum ether : ethyl acetate = 85 : 15) as white needles (892 mg, 2.45 mmol, 95 %). M.p. (petroleum ether :  $\text{Et}_2\text{O}$ ) = 93-94  $^\circ\text{C}$ .

$^1\text{H}$  NMR (400 MHz,  $\text{CDCl}_3$ )  $\delta$  7.81 (dd,  $J = 7.8, 1.8$  Hz, 1H), 7.58 (d,  $J = 8.1$  Hz, 1H), 7.49 (ddd,  $J = 8.4, 7.3, 1.8$  Hz, 1H), 7.38-7.30 (m, 2H), 7.22 (ddd,  $J = 8.1, 7.0, 2.3$  Hz, 1H), 7.19 (d,  $J = 8.4$  Hz, 1H), 7.10 (app t,  $J = 7.5$  Hz, 1H), 5.09 (d,  $J = 7.0$  Hz, 1H), 4.95 (d,  $J = 7.0$  Hz, 1H), 4.40 (d,  $J = 1.9$  Hz, 1H), 4.15 (d,  $J = 1.9$  Hz, 1H), 3.14 (s, 3H).  $^{13}\text{C}$  NMR (100 MHz,  $\text{CDCl}_3$ )  $\delta$  194.4, 157.2, 135.8, 134.7, 132.5, 130.4, 129.8, 127.8, 126.5, 125.8, 122.6, 122.0, 114.5, 94.5, 64.1, 59.2, 56.2. IR  $\nu_{\text{max}}$  (film): 3070, 2956, 2827, 1683, 1598, 1481, 1456, 1282, 1238, 1215, 1198, 1154, 1082, 1015, 977, 895  $\text{cm}^{-1}$ . HRMS (ESI+)  $m/z$  calculated for  $\text{C}_{17}\text{H}_{15}\text{BrNaO}_4$  385.0051 found 385.0080 (M+Na).

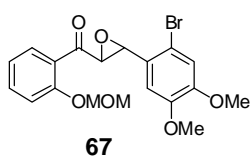

**(3-(2-Bromo-4,5-dimethoxyphenyl)oxiran-2-yl)(2-(methoxymethoxy)phenyl)methanone (67):**

Epoxide **67** was prepared starting from the chalcone **60** (900 mg, 2.21 mmol) and was isolated as a white solid (820 mg, 1.94 mmol, 88 %) after purification by column chromatography (petroleum ether : ethyl acetate = 60 : 40). M.p. (petroleum ether :  $\text{CH}_2\text{Cl}_2$ ) = 109-111  $^\circ\text{C}$ .

$^1\text{H}$  NMR (400 MHz,  $\text{CDCl}_3$ )  $\delta$  7.79 (dd,  $J = 7.7, 1.8$  Hz, 1H), 7.49 (ddd,  $J = 8.4, 7.4, 1.8$  Hz, 1H), 7.19 (d,  $J = 8.3$  Hz, 1H), 7.09 (app t,  $J = 7.6$  Hz, 1H), 7.02 (s, 1H), 6.78 (s, 1H), 5.08 (d,  $J = 7.0$  Hz, 1H), 4.99 (d,  $J = 7.0$  Hz, 1H), 4.32 (d,  $J = 1.9$  Hz, 1H), 4.14 (d,  $J = 1.9$  Hz, 1H), 3.89 (s, 3H), 3.85 (s, 3H), 3.19 (s, 3H).  $^{13}\text{C}$  NMR (100 MHz,  $\text{CDCl}_3$ )  $\delta$  194.4, 157.2, 149.7, 149.0, 134.7, 130.4, 127.6, 126.6, 122.0, 115.1, 114.5, 112.7, 107.9, 94.5, 64.1, 59.3, 56.3, 56.2, 56.1. IR  $\nu_{\text{max}}$  (film): 3002, 2936, 2842, 1683, 1598, 1509, 1482, 1456, 1412, 1386, 1267, 1212, 1158, 1082, 1016, 976, 892  $\text{cm}^{-1}$ . HRMS (ESI+)  $m/z$  calculated for  $\text{C}_{19}\text{H}_{19}\text{BrNaO}_6$  445.0263 found 445.0254 (M+Na).

**IV. Experimental Procedures and Characterization Data for the Preparation of 3-Hydroxy-2-Phenylchroman-4-ones (68-74).**

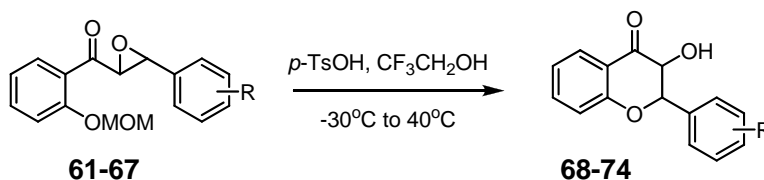



**General Procedure:**<sup>S3</sup> To a solution of the *p*-tolylepoxide **61** (210 mg, 0.70 mmol, 1.0 equiv) in CF<sub>3</sub>CH<sub>2</sub>OH (25 mL) at -30 °C, *p*-TsOH·H<sub>2</sub>O (67.0 mg, 0.35 mmol, 0.50 equiv) was added in one portion and the reaction mixture was allowed to warm up progressively to 40 °C. The mixture was then diluted with water (20 mL) and a saturated solution of NaHCO<sub>3</sub> (20 mL) was added. After extraction with CH<sub>2</sub>Cl<sub>2</sub> (3 x 30 mL), the organic layer was washed with brine (50 mL), dried over MgSO<sub>4</sub>, filtered, and evaporated. The crude product was purified by silica gel chromatography.

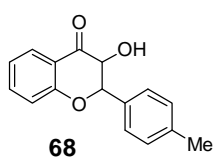

### 3-Hydroxy-2-*p*-tolylchroman-4-one (**68**):

Following the general procedure described above, the title compound **68** was obtained as white needles (169 mg, 0.66 mmol, 94 %). M.p. (petroleum ether : CH<sub>2</sub>Cl<sub>2</sub>) = 172-174 °C. <sup>1</sup>H NMR (400 MHz, CDCl<sub>3</sub>) δ 7.94 (dd, *J* = 7.9, 1.8 Hz, 1H), 7.56 (ddd, *J* = 8.6, 7.2, 1.7 Hz, 1H), 7.48 (d, *J* = 8.1 Hz, 2H), 7.29 (d, *J* = 8.1 Hz, 2H), 7.11 (t, *J* = 7.5 Hz, 1H), 7.05 (d, *J* = 8.5 Hz, 1H), 5.11 (d, *J* = 12.4 Hz, 1H), 4.65 (d, *J* = 12.4 Hz, 1H), 3.66 (br s, 1H), 2.41 (s, 3H). <sup>13</sup>C NMR (100 MHz, CDCl<sub>3</sub>) δ 194.3, 161.7, 139.3, 136.9, 133.2, 129.4 (2C), 127.5 (2C), 127.3, 122.0, 118.5, 118.1, 83.8, 73.6, 21.3. IR ν<sub>max</sub> (film): 3464, 2915, 2839, 1701, 1608, 1461, 1273, 1215, 1141, 1105, 1007, 812 cm<sup>-1</sup>. HRMS (ESI+) *m/z* calculated for C<sub>16</sub>H<sub>14</sub>NaO<sub>3</sub> 277.0841 found 277.0834 (M+Na).

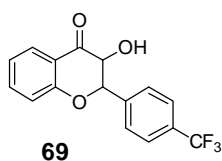

### 3-Hydroxy-2-(4-(trifluoromethyl)phenyl)chroman-4-one (**69**):

Starting from the epoxide **62** (825 mg, 2.34 mmol, 1.0 equiv), the chromanone **69** was obtained as white needles (565 mg, 1.83 mmol, 78 %). M.p. (petroleum ether : CH<sub>2</sub>Cl<sub>2</sub>) = 179-182 °C. <sup>1</sup>H NMR (400 MHz, CDCl<sub>3</sub>) δ 7.95 (dd, *J* = 8.0, 1.3 Hz, 1H), 7.75-7.72 (m, 4H), 7.59 (ddd, *J* = 8.4, 7.3, 1.6 Hz, 1H), 7.15 (t, *J* = 7.5 Hz, 1H), 7.08 (d, *J* = 8.4 Hz, 1H), 5.21 (d, *J* = 12.3 Hz, 1H), 4.57 (d, *J* = 12.3 Hz, 1H), 3.78 (br s, 1H). <sup>13</sup>C NMR (100 MHz, CDCl<sub>3</sub>) δ 193.6, 161.4, 140.2, 137.1, 131.7-130.7 (q, *J* = 32.5 Hz, 1C), 127.8 (2C), 127.4, 125.6-125.5 (q, *J* = 3.8 Hz, 2C), 128.0-119.9 (q, *J* = 272.3 Hz, 1C), 122.4, 118.4, 118.1, 82.9, 73.6. IR ν<sub>max</sub> (film): 3463, 2902, 2850, 1696, 1608, 1465, 1325, 1277, 1137, 1109, 1066, 1011, 835 cm<sup>-1</sup>. HRMS (ESI+) *m/z* calculated for C<sub>16</sub>H<sub>12</sub>F<sub>3</sub>O<sub>3</sub> 309.0739 found 309.0760 (M+H).

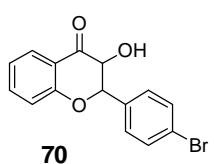

### 2-(4-Bromophenyl)-3-hydroxychroman-4-one (**70**):

The title compound **70** was obtained from epoxide **63** (230 mg, 0.63 mmol, 1.0 equiv) and was isolated as a white solid (192 mg, 0.60 mmol, 95 %). M.p. (petroleum ether : CH<sub>2</sub>Cl<sub>2</sub>) = 192-194 °C. <sup>1</sup>H NMR (400 MHz, CDCl<sub>3</sub>) δ 7.93 (dd, *J* = 7.8, 1.7 Hz, 1H), 7.60 (d, *J* = 8.5 Hz, 2H), 7.57 (ddd, *J* = 8.5, 7.2, 1.7 Hz, 1H), 7.47 (d, *J* = 8.7 Hz, 2H), 7.13 (t, *J* = 7.5 Hz, 1H), 7.05 (d, *J* = 8.4 Hz, 1H), 5.11 (d, *J* = 12.3 Hz, 1H), 4.56 (d, *J* = 12.3 Hz, 1H), 4.10-3.04 (br s, 1H). <sup>13</sup>C NMR (100 MHz, CDCl<sub>3</sub>) δ 193.9, 161.5, 137.1, 135.4, 131.8 (2C), 129.1 (2C), 127.4, 123.4, 122.3, 118.4, 118.1, 83.1, 73.6. IR ν<sub>max</sub> (film): 3464, 2941, 2860, 1699, 1605, 1461, 1290,

<sup>S3</sup> Su, S.; Acquilano, D. E.; Arumugasamy, J.; Beeler, A. B.; Eastwood, E. L.; Giguere, J. R.; Lan, P.; Lei, X.; Min, G. K.; Yeager, A. R.; Zhou, Y.; Panek, J. S.; Snyder, J. K.; Schaus, S. E.; Porco, J. A. Jr. *Org. Lett.* **2005**, *7*, 2751-2754.

1214, 1136, 1104, 1008, 819  $\text{cm}^{-1}$ . HRMS (ESI+)  $m/z$  calculated for  $\text{C}_{15}\text{H}_{11}\text{BrNaO}_3$  340.9789 found 340.9805 (M+Na).

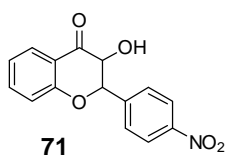

### 3-Hydroxy-2-(4-nitrophenyl)chroman-4-one (71):

Starting from the epoxide **64** (560 mg, 1.70 mmol, 1.0 equiv), the compound **71** was obtained as a light yellow solid (441 mg, 1.55 mmol, 91 %). M.p. (petroleum ether :  $\text{CH}_2\text{Cl}_2$ ) = 180-181  $^\circ\text{C}$ .  $^1\text{H}$  NMR (400 MHz,  $\text{CDCl}_3$ )  $\delta$  8.31 (d,  $J = 8.9$  Hz, 2H), 7.94 (dd,  $J = 7.9, 1.8$  Hz, 1H), 7.79 (d,  $J = 8.9$  Hz, 2H), 7.61 (ddd,  $J = 8.6, 7.2, 1.8$  Hz, 1H), 7.16 (ddd,  $J = 8.0, 7.3, 1.0$  Hz, 1H), 7.09 (d,  $J = 8.4$  Hz, 1H), 5.25 (d,  $J = 12.2$  Hz, 1H), 4.52 (d,  $J = 12.2$  Hz, 1H), 3.81 (br s, 1H).  $^{13}\text{C}$  NMR (100 MHz,  $\text{CDCl}_3$ )  $\delta$  193.3, 161.1, 148.2, 143.4, 137.2, 128.2 (2C), 127.4, 123.7 (2C), 122.6, 118.3, 118.0, 82.4, 73.5. IR  $\nu_{\text{max}}$  (film): 3466, 3110, 3079, 1695, 1608, 1520, 1466, 1348, 1277, 1229, 1139, 1105, 1014, 852  $\text{cm}^{-1}$ . HRMS (ESI+)  $m/z$  calculated for  $\text{C}_{15}\text{H}_{11}\text{NNaO}_5$  308.0535 found 308.0526 (M+Na).

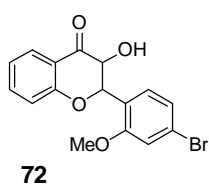

### 2-(4-Bromo-2-methoxyphenyl)-3-hydroxychroman-4-one (72):

Chromanone **72** was prepared from the epoxide **65** (1.08 g, 2.75 mmol, 1.0 equiv) and was obtained as a white solid (770 mg, 2.20 mmol, 80 %). M.p. (petroleum ether :  $\text{CH}_2\text{Cl}_2$ ) = 177-179  $^\circ\text{C}$ .  $^1\text{H}$  NMR (400 MHz,  $\text{CDCl}_3$ )  $\delta$  7.93 (dd,  $J = 7.9, 1.7$  Hz, 1H), 7.54 (ddd,  $J = 8.9, 7.2, 1.7$  Hz, 1H), 7.49 (d,  $J = 8.2$  Hz, 1H), 7.23 (dd,  $J = 8.2, 1.7$  Hz, 1H), 7.12 (d,  $J = 1.9$  Hz, 1H), 7.10 (t,  $J = 7.1$  Hz, 1H), 7.01 (d,  $J = 8.4$  Hz, 1H), 5.61 (d,  $J = 12.6$  Hz, 1H), 4.79 (d,  $J = 12.6$  Hz, 1H), 3.85 (s, 3H), 3.60 (br s, 1H).  $^{13}\text{C}$  NMR (100 MHz,  $\text{CDCl}_3$ )  $\delta$  194.4, 161.9, 158.5, 136.8, 129.7, 127.3, 124.1, 124.0, 123.4, 122.0, 118.6, 118.1, 115.0, 77.3, 72.8, 56.1. IR  $\nu_{\text{max}}$  (film): 3460, 2939, 2851, 1695, 1609, 1595, 1492, 1465, 1398, 1279, 1250, 1226, 1138, 1104, 1007, 895, 848  $\text{cm}^{-1}$ . HRMS (ESI+)  $m/z$  calculated for  $\text{C}_{16}\text{H}_{13}\text{BrNaO}_4$  370.9895 found 370.9874 (M+Na).

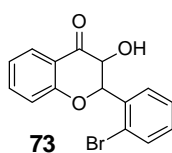

### 2-(2-Bromophenyl)-3-hydroxychroman-4-one (73):

Chromanone **73** was prepared from the epoxide **66** (500 mg, 1.38 mmol, 1.0 equiv) and was obtained as a colorless gum (440 mg, 1.38 mmol, 99 %).  $^1\text{H}$  NMR (400 MHz,  $\text{CDCl}_3$ )  $\delta$  7.95 (d,  $J = 7.9$  Hz, 1H), 7.75 (d,  $J = 7.8$  Hz, 1H), 7.67 (d,  $J = 8.1$  Hz, 1H), 7.57 (dd,  $J = 8.4, 7.2$  Hz, 1H), 7.47 (app t,  $J = 7.7$  Hz, 1H), 7.30 (dd,  $J = 8.1, 7.4$  Hz, 1H), 7.14 (dd,  $J = 8.0, 7.2$  Hz, 1H), 7.05 (d,  $J = 8.4$  Hz, 1H), 5.72 (d,  $J = 12.5$  Hz, 1H), 4.78 (dd,  $J = 12.4, 2.4$  Hz, 1H), 3.65 (d,  $J = 2.4$  Hz, 1H).  $^{13}\text{C}$  NMR (100 MHz,  $\text{CDCl}_3$ )  $\delta$  194.0, 161.6, 137.0, 135.3, 133.3, 130.7, 128.8, 127.9, 127.4, 124.9, 122.3, 118.6, 118.1, 81.9, 73.5. IR  $\nu_{\text{max}}$  (film): 3473, 3066, 2909, 2844, 1695, 1608, 1465, 1302, 1229, 1140, 1105, 1012  $\text{cm}^{-1}$ . HRMS (ESI+)  $m/z$  calculated for  $\text{C}_{15}\text{H}_{11}\text{BrNaO}_3$  340.9789 found 340.9790 (M+Na).

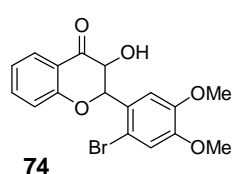

### 2-(2-Bromo-4,5-dimethoxyphenyl)-3-hydroxychroman-4-one (74):

Starting from the epoxide **67** (313 mg, 0.74 mmol, 1.0 equiv), the chromanone **74** was obtained as a white solid (220 mg, 0.58 mmol, 78 %). M.p. (petroleum ether :  $\text{CH}_2\text{Cl}_2$ ) = 187-189  $^\circ\text{C}$ .  $^1\text{H}$  NMR (400 MHz,  $\text{CDCl}_3$ )  $\delta$  7.95 (dd,  $J = 7.8, 1.7$  Hz, 1H),

7.58 (ddd,  $J = 8.4, 7.2, 1.8$  Hz, 1H), 7.19 (s, 1H), 7.13 (ddd,  $J = 7.8, 7.3, 1.0$  Hz, 1H), 7.10 (s, 1H), 7.06 (dd,  $J = 8.4, 2.0$  Hz, 1H), 5.65 (d,  $J = 12.4$  Hz, 1H), 4.73 (dd,  $J = 12.4, 2.3$  Hz, 1H), 3.94 (s, 3H), 3.91 (s, 3H), 3.64 (d,  $J = 2.4$  Hz, 1H).  $^{13}\text{C}$  NMR (100 MHz,  $\text{CDCl}_3$ )  $\delta$  194.0, 161.6, 150.1, 148.8, 136.9, 127.3, 127.0, 122.2, 118.6, 118.1, 115.5, 115.2, 110.6, 82.1, 73.7, 56.2, 56.1. IR  $\nu_{\text{max}}$  (film): 3384, 2933, 2839, 1696, 1609, 1507, 1465, 1262, 1211, 1168, 1134, 1009, 760  $\text{cm}^{-1}$ . HRMS (ESI+)  $m/z$  calculated for  $\text{C}_{17}\text{H}_{15}\text{BrNaO}_5$  401.0001 found 401.0040 (M+Na).

## V. Experimental Procedures for the Preparation of 3-Hydroxyflavones.

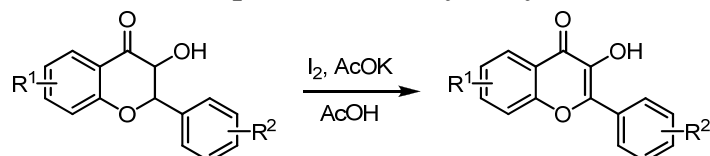

The 3-hydroxyflavones (flavonols) were synthesized following a literature procedure and were used directly in the allylation step without purification.<sup>S4</sup>

## VI. Experimental Procedures and Characterization Data for the Preparation of allyloxyflavones 5b, 11-21, and 73-77.

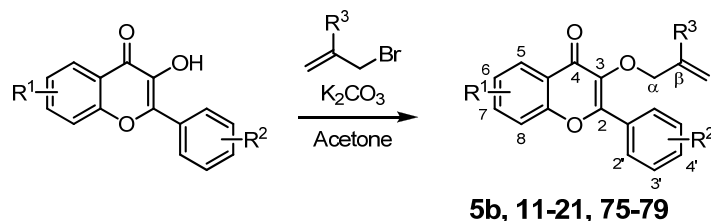

**General Procedure:** To a suspension of commercially available 3-hydroxyflavone (1.00 g, 4.20 mmol, 1.0 equiv) in dry acetone (100 mL) was added at room temperature allyl bromide (0.54 mL, 6.30 mmol, 1.5 equiv, filtered through a plug of basic alumina), followed by  $\text{K}_2\text{CO}_3$  (870.0 mg, 6.30 mmol, 1.5 equiv). The temperature was slowly increased to 65 °C and the reaction mixture was stirred overnight. The mixture was then cooled to room temperature and 30 mL of  $\text{Et}_2\text{O}$  was added. After filtration of the salts through a pad of Celite®, the solvent was removed *in vacuo* and the crude product was purified by column chromatography on silica gel.

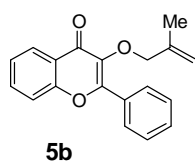

### 3-( $\beta$ -Methylallyloxy)-2-phenyl-4H-chromen-4-one (5b):

Following the same procedure, the methylated allyloxy flavone **5b** was obtained starting from commercially available flavonol (476 mg, 2.00 mmol, 1.0 equiv) using methylallyl bromide (0.30 mL, 3.00 mmol, 1.5 equiv) as allylating agent. The methylallyloxy derivative **5b** was isolated as a colorless oil (579 mg, 1.98 mmol, 99 %) after purification on silica gel (petroleum ether :  $\text{EtOAc} = 90 : 10$ ).  $^1\text{H}$  NMR (400 MHz,  $\text{CDCl}_3$ )  $\delta$  8.27 (dd,  $J = 8.0, 1.7$  Hz, 1H), 8.12-8.06 (m, 2H), 7.68 (ddd,  $J = 8.6, 7.1, 1.6$  Hz, 1H), 7.54 (d,  $J = 8.4$  Hz,

<sup>S4</sup> Džubák, P.; Hajdúch, M.; Gažák, R.; Svobodová, A.; Psotová, J.; Walterová, D.; Sedmera, P.; Křen, V. *Bioorg. Med Chem.* **2006**, *14*, 3793-3810.

1H), 7.52-7.49 (m, 3H), 7.41 (ddd,  $J = 8.0, 7.1, 0.9$  Hz, 1H), 5.01 (s, 1H), 4.89 (s, 1H), 4.53 (s, 2H), 1.70 (s, 3H).  $^{13}\text{C}$  NMR (100 MHz,  $\text{CDCl}_3$ )  $\delta$  175.0, 155.9, 155.2, 141.1, 140.1, 133.3, 131.0, 130.6, 128.8 (2C), 128.3, 125.8 (2C), 124.6, 124.1, 117.9, 113.8, 75.9, 19.6. IR  $\nu_{\text{max}}$  (film): 3070, 2972, 2945, 2915, 2854, 1642, 1615, 1468, 1396, 1236, 1200, 1146, 996, 901, 692  $\text{cm}^{-1}$ . HRMS (ESI+)  $m/z$  calculated for  $\text{C}_{19}\text{H}_{16}\text{NaO}_3$  315.0997 found 315.0999 (M+Na).

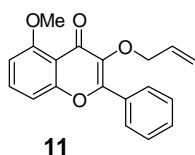

### 3-(Allyloxy)-5-methoxy-2-phenyl-4H-chromen-4-one (11):

5-Methoxy-3-allyloxyflavone **11** was prepared using the general procedure described above starting from the commercially available 5-methoxyflavonol (100.0 mg, 0.37 mmol, 1.0 equiv). The product was obtained as a white solid (114 mg, 0.37 mmol, 99 %) after purification on silica gel (petroleum ether : ethyl acetate = 60 : 40). M.p. (petroleum ether :  $\text{CH}_2\text{Cl}_2$ ) = 90-92  $^\circ\text{C}$ .  $^1\text{H}$  NMR (400 MHz,  $\text{CDCl}_3$ )  $\delta$  8.12-8.09 (br s, 1H), 8.08 (d,  $J = 1.3$  Hz, 1H), 7.52 (t,  $J = 8.4$  Hz, 1H), 7.49-7.43 (m, 3H), 7.07 (d,  $J = 8.4$  Hz, 1H), 6.76 (d,  $J = 8.2$  Hz, 1H), 5.96 (tdd,  $J = 16.7, 10.6, 6.1$  Hz, 1H), 5.27 (dd,  $J = 17.2, 0.9$  Hz, 1H), 5.13 (dd,  $J = 10.3, 0.6$  Hz, 1H), 4.62 (d,  $J = 6.1$  Hz, 2H), 3.99 (s, 3H).  $^{13}\text{C}$  NMR (100 MHz,  $\text{CDCl}_3$ )  $\delta$  174.7, 159.8, 157.2, 153.4, 140.4, 133.7, 133.4, 130.8, 130.3, 128.4 (2C), 128.2 (2C), 118.3, 114.6, 110.0, 105.5, 73.0, 56.4. IR  $\nu_{\text{max}}$  (film): 3076, 2936, 2842, 1644, 1619, 1604, 1477, 1329, 1263, 1201, 1101, 997, 808  $\text{cm}^{-1}$ . HRMS (ESI+)  $m/z$  calculated for  $\text{C}_{19}\text{H}_{16}\text{NaO}_4$  331.0946 found 331.0956 (M+Na).

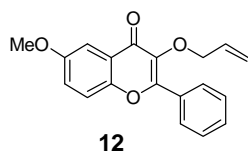

### 3-(Allyloxy)-6-methoxy-2-phenyl-4H-chromen-4-one (12):

Starting from the commercially available 6-methoxyflavonol (200 mg, 0.75 mmol, 1.0 equiv), the title compound **12** was obtained as colorless flakes (228 mg, 0.74 mmol, 99 %) after purification on silica gel (petroleum ether : ethyl acetate = 70 : 30). M.p. (petroleum ether :  $\text{Et}_2\text{O}$ ) = 91-92  $^\circ\text{C}$ .  $^1\text{H}$  NMR (400 MHz,  $\text{CDCl}_3$ )  $\delta$  8.12-8.09 (m, 1H), 8.10 (d,  $J = 3.1$  Hz, 1H), 7.61 (d,  $J = 3.1$  Hz, 1H), 7.53-7.49 (m, 3H), 7.47 (d,  $J = 9.1$  Hz, 1H), 7.28 (dd,  $J = 9.3, 3.3$  Hz, 1H), 5.94 (app tdd,  $J = 17.1, 10.3, 6.1$  Hz, 1H), 5.27 (d,  $J = 17.2$  Hz, 1H), 5.15 (d,  $J = 10.3$  Hz, 1H), 4.63 (d,  $J = 6.1$  Hz, 2H), 3.92 (s, 3H).  $^{13}\text{C}$  NMR (100 MHz,  $\text{CDCl}_3$ )  $\delta$  174.8, 156.5, 155.7, 150.1, 139.5, 133.5, 131.1, 130.5, 128.6 (2C), 128.3 (2C), 124.6, 123.7, 119.4, 118.4, 104.4, 73.2, 55.8. IR  $\nu_{\text{max}}$  (film): 3076, 2939, 2836, 1635, 1616, 1565, 1488, 1449, 1385, 1275, 1214, 1170, 1031, 930, 783, 692  $\text{cm}^{-1}$ . HRMS (ESI+)  $m/z$  calculated for  $\text{C}_{19}\text{H}_{16}\text{NaO}_4$  331.0946 found 331.0933 (M+Na).

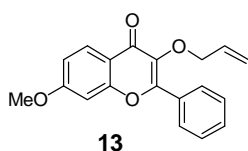

### 3-(Allyloxy)-7-methoxy-2-phenyl-4H-chromen-4-one (13):

7-Methoxy-3-allyloxyflavone **13** was prepared using the general procedure described above starting from commercially available 7-methoxyflavonol (450 mg, 1.68 mmol, 1.0 equiv). The product was obtained as light yellow flakes (503 mg, 1.63 mmol, 97 %) after purification on silica gel (petroleum ether : ethyl acetate = 60 : 40). M.p. (petroleum ether :  $\text{Et}_2\text{O}$ ) = 125-127  $^\circ\text{C}$ .  $^1\text{H}$  NMR (400 MHz,  $\text{CDCl}_3$ )  $\delta$  8.14 (d,  $J = 8.9$  Hz, 1H), 8.10-8.06 (m, 2H), 7.51-7.46 (m, 3H), 6.96 (dd,  $J = 8.9, 2.3$  Hz, 1H), 6.90 (d,  $J = 2.3$  Hz, 1H), 5.93 (tdd,  $J = 16.4, 10.4, 6.1$  Hz, 1H), 5.26 (d,  $J = 17.1$  Hz, 1H), 5.13 (d,  $J = 10.4$  Hz, 1H), 4.63 (d,  $J = 6.1$  Hz, 2H), 3.90 (s, 3H).  $^{13}\text{C}$  NMR (100 MHz,  $\text{CDCl}_3$ )  $\delta$  174.5, 164.0, 157.0, 155.4, 139.8, 133.6, 131.1,

130.4, 128.5 (2C), 128.3 (2C), 127.1, 118.3, 118.0, 114.4, 99.8, 73.2, 55.8. IR  $\nu_{\max}$  (film): 3073, 2942, 2836, 1637, 1622, 1446, 1391, 1256, 1205, 1173, 1105, 997, 693  $\text{cm}^{-1}$ . HRMS (ESI+)  $m/z$  calculated for  $\text{C}_{19}\text{H}_{16}\text{NaO}_4$  331.0946 found 331.0921 (M+Na).

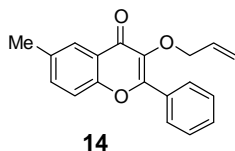

### 3-(Allyloxy)-6-methyl-2-phenyl-4H-chromen-4-one (14):

The title compound **14** was prepared following the general allylation procedure starting from commercially available 6-methylflavonol (300 mg, 1.19 mmol, 1.0 equiv). The product was obtained after purification on silica gel (petroleum ether : ethyl acetate = 90 : 10) as a colorless gum (345 mg, 1.18 mmol, 99 %).  $^1\text{H}$  NMR (400 MHz,  $\text{CDCl}_3$ )  $\delta$  8.11 (d,  $J = 4.3$  Hz, 1H), 8.09 (d,  $J = 2.1$  Hz, 1H), 8.03 (s, 1H), 7.52-7.45 (m, 4H), 7.42 (d,  $J = 8.5$  Hz, 1H), 5.93 (tdd,  $J = 16.5, 10.4, 6.1$  Hz, 1H), 5.26 (dd,  $J = 17.2, 1.4$  Hz, 1H), 5.14 (dd,  $J = 10.3, 1.0$  Hz, 1H), 4.62 (d,  $J = 6.1$  Hz, 1H), 2.46 (s, 1H).  $^{13}\text{C}$  NMR (100 MHz,  $\text{CDCl}_3$ )  $\delta$  175.1, 155.8, 153.5, 139.8, 134.7, 134.5, 133.5, 131.1, 130.5, 128.6 (2C), 128.3 (2C), 124.9, 123.7, 118.4, 117.7, 73.2, 20.9. IR  $\nu_{\max}$  (film): 3060, 2923, 2868, 1640, 1619, 1564, 1488, 1447, 1382, 1282, 1213, 1168, 993, 932, 815  $\text{cm}^{-1}$ . HRMS (ESI+)  $m/z$  calculated for  $\text{C}_{19}\text{H}_{17}\text{O}_3$  293.1176 found 293.1178 (M+H).

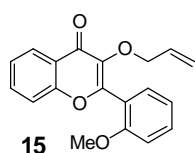

### 3-(Allyloxy)-2-(2'-methoxyphenyl)-4H-chromen-4-one (15):

Starting from commercially available 2'-methoxy flavonol (268 mg, 1.00 mmol, 1.0 equiv), the allyloxy flavone **15** was purified by column chromatography on silica gel (petroleum ether : EtOAc = 90:10) and was obtained as a colorless gum (300 mg, 0.97 mmol, 97 %).  $^1\text{H}$  NMR (400 MHz,  $\text{CDCl}_3$ )  $\delta$  8.29 (dd,  $J = 8.0, 1.7$  Hz, 1H), 7.65 (ddd,  $J = 8.7, 7.1, 1.7$  Hz, 1H), 7.48 (ddd,  $J = 8.3, 7.4, 1.8$  Hz, 1H), 7.46 (d,  $J = 7.8$  Hz, 2H), 7.39 (ddd,  $J = 8.1, 7.1, 1.1$  Hz, 1H), 7.07 (dt,  $J = 7.5, 1.0$  Hz, 1H), 7.03 (d,  $J = 8.3$  Hz, 1H), 5.79 (tdd,  $J = 17.2, 10.4, 5.9$  Hz, 1H), 5.12 (dd,  $J = 17.2, 1.7$  Hz, 1H), 5.05 (dd,  $J = 10.4, 1.7$  Hz, 1H), 4.58 (d,  $J = 5.9$  Hz, 2H), 3.84 (s, 3H).  $^{13}\text{C}$  NMR (100 MHz,  $\text{CDCl}_3$ )  $\delta$  174.8, 157.3, 156.4, 155.6, 140.5, 133.8, 133.1, 131.8, 130.8, 125.7, 124.5, 124.4, 120.2 (2C), 118.1, 117.5, 111.2, 73.1, 55.6. IR  $\nu_{\max}$  (film): 3073, 2936, 2839, 1643, 1622, 1466, 1396, 1278, 1257, 1200, 1146, 1111, 1024, 995, 902  $\text{cm}^{-1}$ . HRMS (ESI+)  $m/z$  calculated for  $\text{C}_{19}\text{H}_{16}\text{NaO}_4$  331.0946 found 331.0933 (M+Na).

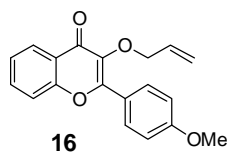

### 3-(Allyloxy)-2-(4'-methoxyphenyl)-4H-chromen-4-one (16):

Starting from commercially available 4'-methoxy flavonol (300 mg, 1.12 mmol, 1.0 equiv), the allylated flavone **16** was obtained as white needles (339 mg, 1.10 mmol, 98 %). M.p. (petroleum ether :  $\text{Et}_2\text{O}$ ) = 88-89  $^\circ\text{C}$ .  $^1\text{H}$  NMR (400 MHz,  $\text{CDCl}_3$ )  $\delta$  8.24 (dd,  $J = 8.0, 1.6$  Hz, 1H), 8.12 (d,  $J = 9.1$  Hz, 2H), 7.64 (ddd,  $J = 8.6, 7.1, 1.7$  Hz, 1H), 7.50 (d,  $J = 8.4$  Hz, 1H), 7.37 (app t,  $J = 7.6$  Hz, 1H), 7.00 (d,  $J = 9.1$  Hz, 2H), 5.97 (tdd,  $J = 16.5, 10.4, 6.1$  Hz, 1H), 5.29 (dd,  $J = 17.2, 1.6$  Hz, 1H), 5.15 (dd,  $J = 10.3, 1.6$  Hz, 1H), 4.63 (d,  $J = 6.1$  Hz, 2H), 3.88 (s, 3H).  $^{13}\text{C}$  NMR (100 MHz,  $\text{CDCl}_3$ )  $\delta$  174.9, 161.4, 155.9, 155.1, 139.3, 133.7, 133.1, 130.4 (2C), 125.7, 124.5, 124.1, 123.4, 118.3, 117.8, 113.8 (2C), 73.0, 55.3. IR  $\nu_{\max}$  (film): 3073, 2936, 2832, 1636, 1605, 1509, 1468, 1391, 1259, 1200, 1181, 1147, 1033, 834  $\text{cm}^{-1}$ . HRMS (ESI+)  $m/z$  calculated for  $\text{C}_{19}\text{H}_{16}\text{NaO}_4$  331.0946 found 331.0977 (M+Na).

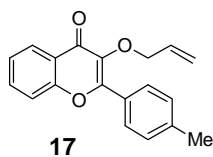

### 3-(Allyloxy)-2-*p*-tolyl-4*H*-chromen-4-one (17):

The title compound **17** was synthesized starting from chromanone **68** (221 mg, 0.87 mmol, 1.0 equiv) *via* the oxidation/allylation sequence and was isolated as a colorless oil (203 mg, 0.69 mmol, 80 %, two steps) after column chromatography on silica gel (petroleum ether : Et<sub>2</sub>O = 70:30). <sup>1</sup>H NMR (400 MHz, CDCl<sub>3</sub>) δ 8.26 (dd, *J* = 8.0, 1.7 Hz, 1H), 8.03 (d, *J* = 8.3 Hz, 2H), 7.67 (ddd, *J* = 8.6, 7.1, 1.7 Hz, 1H), 7.53 (d, *J* = 8.5 Hz, 1H), 7.39 (ddd, *J* = 8.1, 7.1, 1.1 Hz, 1H), 7.31 (d, *J* = 8.1 Hz, 2H), 5.96 (tdd, *J* = 16.4, 10.3, 6.1 Hz, 1H), 5.29 (dd, *J* = 17.2, 1.6 Hz, 1H), 5.15 (dd, *J* = 10.3, 1.6 Hz, 1H), 4.64 (d, *J* = 6.1 Hz, 2H), 2.44 (s, 3H). <sup>13</sup>C NMR (100 MHz, CDCl<sub>3</sub>) δ 175.1, 156.2, 155.2, 141.1, 139.7, 133.6, 133.3, 129.1, 128.6 (2C), 128.2, 125.8 (2C), 124.6, 124.1, 118.4, 117.9, 73.2, 21.5. IR ν<sub>max</sub> (film): 3079, 2924, 2866, 1639, 1613, 1468, 1391, 1200, 1146, 994, 821 cm<sup>-1</sup>. HRMS (ESI+) *m/z* calculated for C<sub>19</sub>H<sub>16</sub>NaO<sub>3</sub> 315.0997 found 315.1021 (M+Na).

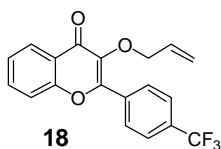

### 3-(Allyloxy)-2-(4'-(trifluoromethyl)phenyl)-4*H*-chromen-4-one (18):

The title compound **18** was synthesized in two steps starting from 3-hydroxychromanone **69** (250 mg, 0.81 mmol, 1.0 equiv) after oxidation of the latter to the intermediate flavonol followed by allylation of the 3-hydroxyl group. The product was obtained after column chromatography (petroleum ether : ethyl acetate = 85 : 15) as a white powder (245 mg, 0.71 mmol, 87 % over two steps). M.p. (petroleum ether : Et<sub>2</sub>O) = 72-74 °C. <sup>1</sup>H NMR (400 MHz, CDCl<sub>3</sub>) δ 8.25 (dd, *J* = 8.0, 1.7 Hz, 1H), 8.24 (d, *J* = 8.2 Hz, 2H), 7.76 (d, *J* = 8.3 Hz, 2H), 7.70 (ddd, *J* = 8.7, 7.1, 1.7 Hz, 1H), 7.54 (d, *J* = 8.5 Hz, 1H), 7.41 (ddd, *J* = 8.1, 7.1, 1.0 Hz, 1H), 5.91 (tdd, *J* = 17.0, 10.3, 6.1 Hz, 1H), 5.28 (dd, *J* = 17.2, 1.5 Hz, 1H), 5.16 (dd, *J* = 10.3, 1.5 Hz, 1H), 4.69 (d, *J* = 6.1 Hz, 2H). <sup>13</sup>C NMR (100 MHz, CDCl<sub>3</sub>) δ 175.0, 155.2, 154.0, 140.5, 134.4, 133.7, 133.1, 132.5-131.5 (q, *J* = 32.8 Hz, 1C), 129.0 (2C), 125.8, 125.3-125.2 (q, *J* = 3.8 Hz, 2C), 124.9, 124.0, 127.8-119.6 (q, *J* = 272.5 Hz, 1C), 119.0, 118.0, 73.4. IR ν<sub>max</sub> (film): 3079, 2937, 2874, 1645, 1615, 1469, 1413, 1393, 1325, 1288, 1238, 1203, 1170, 1127, 1070, 1017, 993, 850 cm<sup>-1</sup>. HRMS (ESI+) *m/z* calculated for C<sub>19</sub>H<sub>14</sub>F<sub>3</sub>O<sub>3</sub> 347.0895 found 347.0925 (M+H).

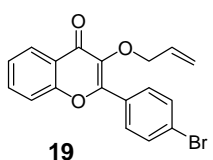

### 3-(Allyloxy)-2-(4'-bromophenyl)-4*H*-chromen-4-one (19):

Starting from chromanone **70** (192 mg, 0.60 mmol, 1.0 equiv), and following the same sequence of oxidation/allylation, the 4'-brominated allyloxyflavone **19** was isolated as white needles (190 mg, 0.53 mmol, 88 % over two steps) after purification by silica gel chromatography (petroleum ether : ethyl acetate = 90 : 10). M.p. (petroleum ether : Et<sub>2</sub>O) = 85-87 °C. <sup>1</sup>H NMR (400 MHz, CDCl<sub>3</sub>) δ 8.24 (dd, *J* = 8.0, 1.7 Hz, 1H), 8.01 (d, *J* = 8.7 Hz, 2H), 7.68 (ddd, *J* = 8.7, 7.1, 1.7 Hz, 1H), 7.63 (d, *J* = 8.7 Hz, 2H), 7.52 (d, *J* = 8.4 Hz, 1H), 7.40 (ddd, *J* = 8.0, 7.3, 1.0 Hz, 1H), 5.92 (tdd, *J* = 16.5, 10.3, 6.1 Hz, 1H), 5.27 (dd, *J* = 17.1, 1.5 Hz, 1H), 5.16 (dd, *J* = 10.4, 1.1 Hz, 1H), 4.65 (d, *J* = 6.1 Hz, 2H). <sup>13</sup>C NMR (100 MHz, CDCl<sub>3</sub>) δ 175.0, 155.1, 154.7, 140.0, 133.5, 133.3, 131.6 (2C), 130.2 (2C), 129.9, 125.8, 125.2, 124.8, 124.0, 118.8, 117.9, 73.2. IR ν<sub>max</sub> (film): 3077, 2927, 1643, 1614, 1469, 1403, 1386, 1292, 1238, 1201, 1147, 1011, 992, 828 cm<sup>-1</sup>. HRMS (ESI+) *m/z* calculated for C<sub>18</sub>H<sub>14</sub>BrO<sub>3</sub> 357.0126 found 357.0107 (M+H).

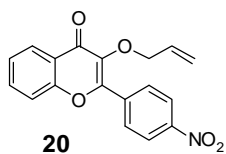

### 3-(Allyloxy)-2-(4'-nitrophenyl)-4H-chromen-4-one (20):

4'-Nitro allyloxyflavone **20** was prepared starting from the chromanone **71** (300 mg, 1.05 mmol, 1.0 equiv) following the oxidation/allylation sequence described above, and was isolated as yellow needles (185 mg, 0.57 mmol, 54 % over two steps) after silica gel chromatography (petroleum ether : ethyl acetate = 70 : 30). M.p. (petroleum ether : ethyl acetate) = 124-125 °C. <sup>1</sup>H NMR (400 MHz, CDCl<sub>3</sub>) δ 8.37-8.30 (m, 4H), 8.25 (dd, *J* = 8.0, 1.7 Hz, 1H), 7.72 (ddd, *J* = 8.8, 7.5, 1.7 Hz, 1H), 7.56 (d, *J* = 8.5 Hz, 1H), 7.43 (t, *J* = 7.6 Hz, 1H), 5.90 (tdd, *J* = 16.7, 10.3, 6.1 Hz, 1H), 5.28 (dd, *J* = 17.1, 1.5 Hz, 1H), 5.17 (dd, *J* = 10.3, 1.0 Hz, 1H), 4.73 (d, *J* = 6.2 Hz, 2H). <sup>13</sup>C NMR (100 MHz, CDCl<sub>3</sub>) δ 174.9, 155.1, 152.8, 148.4, 141.0, 137.0, 134.0, 132.9, 129.6 (2C), 125.9, 125.1, 124.0, 123.4 (2C), 119.3, 118.0, 73.5. IR  $\nu_{\max}$  (film): 3078, 2935, 1646, 1521, 1470, 1347, 1203, 1148, 1110, 855, 703 cm<sup>-1</sup>. HRMS (ESI+) *m/z* calculated for C<sub>18</sub>H<sub>14</sub>NO<sub>5</sub> 324.0872 found 324.0880 (M+H).

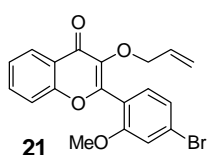

### 3-(Allyloxy)-2-(4'-bromo-2'-methoxyphenyl)-4H-chromen-4-one (21):

Starting from the 3-hydroxychromanone **72** (300 mg, 0.86 mmol, 1.0 equiv), the title compound **21** was synthesized in two steps using the oxidation/allylation sequence described above and was purified by chromatography on silica gel (petroleum ether : ethyl acetate = 85 : 15), affording a colorless oil (322 mg, 0.83 mmol, 97 %, two steps). <sup>1</sup>H NMR (400 MHz, CDCl<sub>3</sub>) δ 8.27 (dd, *J* = 8.0, 1.6 Hz, 1H), 7.64 (ddd, *J* = 8.7, 7.1, 1.7 Hz, 1H), 7.44 (d, *J* = 9.0 Hz, 1H), 7.38 (ddd, *J* = 8.0, 7.1, 1.0 Hz, 1H), 7.32 (d, *J* = 8.1 Hz, 1H), 7.20 (dd, *J* = 8.1, 1.8 Hz, 1H), 7.16 (d, *J* = 1.7 Hz, 1H), 5.78 (tdd, *J* = 17.2, 10.4, 5.9 Hz, 1H), 5.13 (ddt, *J* = 17.2, 1.6, 1.6 Hz, 1H), 5.07 (app ddt, *J* = 10.4, 1.4, 1.2 Hz, 1H), 4.58 (d, *J* = 5.9 Hz, 2H), 3.82 (s, 3H). <sup>13</sup>C NMR (100 MHz, CDCl<sub>3</sub>) δ 174.7, 157.8, 155.6, 155.1, 140.5, 133.7, 133.2, 131.9, 125.7, 125.5, 124.5, 124.4, 123.4, 119.3, 118.1, 177.8, 114.9, 73.1, 55.9. IR  $\nu_{\max}$  (film): 3076, 2941, 1644, 1621, 1588, 1489, 1466, 1404, 1253, 1201, 1148, 1118, 1027, 902 cm<sup>-1</sup>. HRMS (ESI+) *m/z* calculated for C<sub>19</sub>H<sub>16</sub>BrO<sub>4</sub> 387.0232 found 387.0213 (M+H).

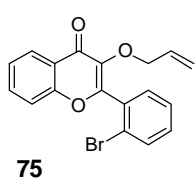

### 3-(Allyloxy)-2-(2'-bromophenyl)-4H-chromen-4-one (75):

The title compound **75** was synthesized in two steps starting from 3-hydroxychromanone **73** (440.0 mg, 1.38 mmol, 1.0 equiv) after oxidation to the intermediate flavonol followed by allylation of the 3-hydroxyl group. The product was obtained after column chromatography (petroleum ether : ethyl acetate = 90 : 10) as light yellow needles (425 mg, 1.19 mmol, 86 %, two steps). M.p. (petroleum ether : Et<sub>2</sub>O) = 102-103 °C. <sup>1</sup>H NMR (400 MHz, CDCl<sub>3</sub>) δ 8.30 (d, *J* = 8.0 Hz, 1H), 7.73 (d, *J* = 8.0 Hz, 1H), 7.69 (dd, *J* = 8.6, 7.1 Hz, 1H), 7.54 (d, *J* = 7.6 Hz, 1H), 7.49 (d, *J* = 8.4 Hz, 1H), 7.46 (d, *J* = 7.1 Hz, 1H), 7.42 (d, *J* = 7.1 Hz, 1H), 7.38 (app t, *J* = 7.5 Hz, 1H), 5.74 (app tdd, *J* = 16.4, 10.3, 6.1 Hz, 1H), 5.12 (d, *J* = 17.2 Hz, 1H), 5.07 (d, *J* = 10.3 Hz, 1H), 4.57 (d, *J* = 6.1 Hz, 2H). <sup>13</sup>C NMR (100 MHz, CDCl<sub>3</sub>) δ 175.0, 157.0, 155.5, 140.2, 133.5, 133.4, 133.1, 132.2, 131.8, 131.5, 127.1, 125.8, 124.8, 124.6, 122.8, 118.4, 118.1, 73.5. IR  $\nu_{\max}$  (film): 3070, 2927, 2866, 1647, 1623, 1466, 1396, 1266, 1235, 1199, 1150, 993, 906 cm<sup>-1</sup>. HRMS (ESI+) *m/z* calculated for C<sub>18</sub>H<sub>14</sub>BrO<sub>3</sub> 357.0126 found 357.0112 (M+H).

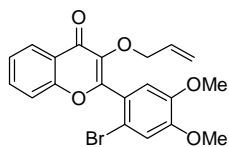

**76**

### 3-(Allyloxy)-2-(2'-bromo-4',5'-dimethoxyphenyl)-4H-chromen-4-one (76):

The allyloxyflavone **76** was synthesized in two steps after oxidation of chromanone **74** (451 mg, 1.19 mmol, 1.0 equiv) and allylation of the intermediate flavonol. After purification *via* column chromatography on silica gel (petroleum ether : ethyl acetate = 80 : 20), the title compound was isolated as a white solid (325 mg, 0.78 mmol, 65 %, two steps). M.p. (petroleum ether : Et<sub>2</sub>O) = 108-110 °C. <sup>1</sup>H NMR (400 MHz, CDCl<sub>3</sub>) δ 8.28 (dd, *J* = 8.0, 1.7 Hz, 1H), 7.67 (ddd, *J* = 8.5, 7.1, 1.7 Hz, 1H), 7.49 (d, *J* = 8.4 Hz, 1H), 7.41 (app t, *J* = 7.6 Hz, 1H), 7.15 (s, 1H), 7.04 (s, 1H), 5.77 (tdd, *J* = 16.4, 10.3, 6.1 Hz, 1H), 5.15 (dd, *J* = 17.2, 1.6 Hz, 1H), 5.08 (dd, *J* = 10.3, 1.6 Hz, 1H), 4.56 (d, *J* = 6.1 Hz, 2H), 3.95 (s, 3H), 3.88 (s, 3H). <sup>13</sup>C NMR (100 MHz, CDCl<sub>3</sub>) δ 175.0, 157.0, 155.4, 150.8, 147.9, 140.0, 133.5, 133.4, 125.8, 124.7, 124.5, 124.0, 118.4, 118.1, 115.6, 114.1, 113.5, 73.5, 56.3, 56.2. IR ν<sub>max</sub> (film): 3079, 2933, 2836, 1645, 1623, 1505, 1466, 1406, 1261, 1213, 1200, 1146, 760 cm<sup>-1</sup>. HRMS (ESI+) *m/z* calculated for C<sub>20</sub>H<sub>18</sub>BrO<sub>5</sub> 417.0338 found 417.0378 (M+H).

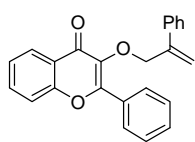

**77**

### 3-(β-Phenylallyloxy)-2-phenyl-4H-chromen-4-one (77):

Allyloxyflavone **77** was obtained starting from commercially available flavonol (300.0 mg, 1.26 mmol, 1.0 equiv) and using α-bromomethylstyrene<sup>S5</sup> (50 mol % as a mixture with 1-bromo-2-phenyl-propene, 744 mg, 1.89 mmol, 1.5 equiv) as allylating agent. The title compound was isolated as white needles (384 mg, 1.08 mmol, 86 %). M.p. (petroleum ether : CH<sub>2</sub>Cl<sub>2</sub>) = 93-94 °C. <sup>1</sup>H NMR (400 MHz, CDCl<sub>3</sub>) δ 8.30 (d, *J* = 8.0 Hz, 1H), 7.96 (d, *J* = 8.3 Hz, 2H), 7.68 (app t, *J* = 7.8 Hz, 1H), 7.53 (d, *J* = 8.5 Hz, 1H), 7.48-7.44 (m, 2H), 7.41 (app t, *J* = 7.2 Hz, 2H), 7.35 (app t, *J* = 7.5 Hz, 2H), 7.27-7.20 (m, 3H), 5.54 (s, 1H), 5.39 (s, 1H), 5.09 (s, 2H). <sup>13</sup>C NMR (100 MHz, CDCl<sub>3</sub>) δ 175.1, 156.1, 155.2, 143.4, 139.9, 138.0, 133.3, 130.6, 130.5, 128.7 (2C), 128.1 (4C), 127.6, 126.0 (2C), 125.7, 124.6, 124.1, 117.9, 116.2, 73.6. IR ν<sub>max</sub> (film): 3055, 2942, 2878, 1639, 1615, 1468, 1395, 1237, 1199, 1146, 992, 900, 709, 691 cm<sup>-1</sup>. HRMS (ESI+) *m/z* calculated for C<sub>24</sub>H<sub>18</sub>NaO<sub>3</sub> 377.1154 found 377.1188 (M+Na).

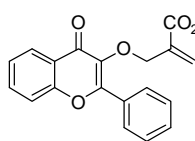

**78**

### 3-(β-Ethylesterallyloxy)-2-phenyl-4H-chromen-4-one (78):

Starting from commercially available flavonol (600 mg, 2.52 mmol, 1.0 equiv) and using ethyl 2-(bromomethyl)acrylate as the allylating agent (0.52 mL, 3.78 mmol, 1.5 equiv), the title compound **78** was obtained as a white solid (879 mg, 2.51 mmol, 99 %). M.p. (petroleum ether : CH<sub>2</sub>Cl<sub>2</sub>) = 77-78 °C. <sup>1</sup>H NMR (400 MHz, CDCl<sub>3</sub>) δ 8.27 (d, *J* = 8.0 Hz, 1H), 8.05 (br s, 2H), 7.69 (t, *J* = 7.8 Hz, 1H), 7.54 (d, *J* = 8.5 Hz, 1H), 7.49 (br s, 3H), 7.42 (t, *J* = 7.5 Hz, 1H), 6.30 (s, 1H), 5.95 (s, 1H), 4.89 (s, 2H), 4.01 (q, *J* = 7.1 Hz, 2H), 1.18 (t, *J* = 7.1 Hz, 3H). <sup>13</sup>C NMR (100 MHz, CDCl<sub>3</sub>) δ 174.9, 165.3, 156.1, 155.2, 139.7, 136.3, 133.4, 130.7, 130.6, 128.7 (2C), 128.3 (2C), 127.8, 125.7, 124.7, 124.0, 117.9, 70.2, 60.6, 14.0. IR ν<sub>max</sub> (film): 3061, 2979, 2850, 1718, 1641, 1615, 1467, 1397, 1200, 1144, 1035, 693 cm<sup>-1</sup>. HRMS (ESI+) *m/z* calculated for C<sub>21</sub>H<sub>18</sub>NaO<sub>5</sub> 373.1052 found 373.1066 (M+Na).

<sup>S5</sup>Vaccher, C.; Berthelot, P.; Flouquet, N.; Vaccher, M.-P.; Debaert, M. *Synth. Commun.* **1993**, *23*, 671-679.



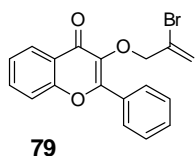

### 3-(β-Bromoallyloxy)-2-phenyl-4H-chromen-4-one (**79**):

2,3-Dibromopropene (0.46 mL, 3.78 mmol, 1.5 equiv) was used for the allylation of non-substituted flavonol (600 mg, 2.52 mmol, 1.0 equiv). The brominated allyloxy flavone **79** was obtained as colorless gum (877 mg, 2.45 mmol, 98 %), after purification on silica gel (petroleum ether : Et<sub>2</sub>O = 85 : 15). <sup>1</sup>H NMR (400 MHz, CDCl<sub>3</sub>)

δ 8.26 (d, *J* = 8.3 Hz, 1H), 8.12-8.08 (m, 2H), 7.70 (ddd, *J* = 8.7, 7.1, 1.9 Hz, 1H), 7.55 (d, *J* = 8.5 Hz, 1H), 7.54-7.50 (m, 3H), 7.42 (t, *J* = 7.5 Hz, 1H), 5.96 (s, 1H), 5.59 (s, 1H), 4.84 (s, 2H). <sup>13</sup>C NMR (100 MHz, CDCl<sub>3</sub>) δ 174.7, 156.2, 155.2, 139.2, 133.5, 130.8, 130.6, 129.0 (2C), 128.3 (2C), 127.3, 125.7, 124.8, 124.0, 119.8, 118.0, 75.5. IR ν<sub>max</sub> (film): 3061, 2921, 2860, 1639, 1615, 1467, 1395, 1198, 1147, 899, 691 cm<sup>-1</sup>. HRMS (ESI+) *m/z* calculated for C<sub>18</sub>H<sub>13</sub>BrNaO<sub>3</sub> 378.9946 found 378.9945 (M+Na).

## VII. Experimental Procedures and Characterization Data for Sc(OTf)<sub>3</sub>-(*R*)-Pybox-Ph-mediated Rearrangement Products.

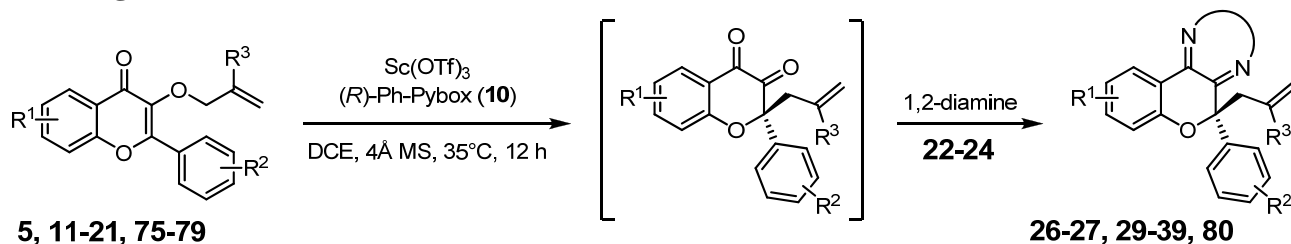

**General Procedure:** To a suspension of molecular sieves (4Å, 250.0 mg, flame-dried under high vacuum) was added, *via* cannula, a pre-stirred solution of Sc(OTf)<sub>3</sub> (23 mg, 0.05 mmol, 0.30 equiv) and (*R,R*)-(+)-2,6-bis(4-phenyl-2-oxazoliny)pyridine **10** (20 mg, 0.05 mmol, 0.33 equiv) in DCE (3 mL). After stirring the suspension at rt for 2 h, a solution of allyloxyflavone **5a** (0.16 mmol, 1.0 equiv) in DCE (2 mL) was slowly added *via* cannula. The mixture was stirred at room temperature for 30 min and stirred overnight at 35 °C. 1,2-Ethylene diamine **24** (27 μL, 0.40 mmol, 2.50 equiv) was added in one portion and the mixture was allowed to stir for an additional 2 h at room temperature. After removal of the molecular sieves by filtration of the crude mixture through a pad of Celite, the solvent was evaporated *in vacuo* and the pyrazines **26-30** or dihydropyrazines **31-39**, and **80** were isolated by flash column chromatography on silica gel.

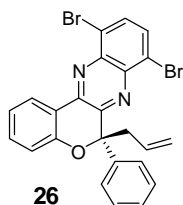

### (*S*)-6-Allyl-8,11-dibromo-6-phenyl-6H-chromeno[3,4-*b*]quinoxaline (**26**):

Pyrazine **26** was obtained using 3,6-dibromo-*o*-phenylenediamine<sup>S6</sup> **22b** (106 mg, 0.40 mmol, 2.5 equiv) for the condensation step. Purification on silica gel (petroleum ether : dichloromethane = 80 : 20) afforded the pyrazine **26** as a light yellow solid (80 mg, 0.16 mmol, 98 %). M.p. (petroleum ether : Et<sub>2</sub>O) = 152-154 °C. [α]<sub>D</sub><sup>25</sup> (*c* 0.9, CHCl<sub>3</sub>) = -96.2°. The er value could not be determined using HPLC analysis due to inseparable peaks. <sup>1</sup>H NMR (400 MHz, CDCl<sub>3</sub>) δ 8.38 (d, *J* = 7.8 Hz, 1H), 7.89 (d, *J* = 3.8 Hz, 2H), 7.47 (t, *J* = 7.6 Hz, 1H), 7.39 (d, *J* = 7.5 Hz, 2H), 7.25-7.22 (m, 1H), 7.20 (d, *J* = 7.9 Hz, 2H), 7.16 (d, *J* = 7.1 Hz, 1H), 7.11

<sup>S6</sup>Mancilha, F. S.; DaSilveira Neto, B. A.; Lopes, A. S.; Moreira, P. F., Jr.; Quina, F. H.; Gonçalves, R. S.; Dupont, J. *Eur. J. Org. Chem.* **2006**, 21, 4924-4933.

(t,  $J = 7.5$  Hz, 1H), 5.95 (app tdd,  $J = 17.3, 10.2, 7.0$  Hz, 1H), 5.25 (br d,  $J = 17.2$  Hz, 1H), 5.06 (br d,  $J = 10.3$  Hz, 1H), 3.66 (dd,  $J = 14.4, 7.6$  Hz, 1H), 3.29 (dd,  $J = 14.4, 6.5$  Hz, 1H).  $^{13}\text{C}$  NMR (100 MHz,  $\text{CDCl}_3$ )  $\delta$  156.5, 152.3, 144.6, 141.2, 140.6, 140.0, 133.9, 133.4, 132.8, 132.4, 128.2 (2C), 127.6, 126.4, 125.9 (2C), 124.1, 123.7, 122.7, 120.2, 119.5, 118.2, 85.7, 45.9. IR  $\nu_{\text{max}}$  (film): 3073, 2921, 2851, 1607, 1473, 1442, 1388, 1314, 1226, 1183, 1107, 936, 875, 827, 753, 717  $\text{cm}^{-1}$ . HRMS (ESI+)  $m/z$  calculated for  $\text{C}_{24}\text{H}_{17}\text{Br}_2\text{N}_2\text{O}$  506.9708 found 506.9701 (M+H).

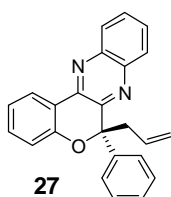

**(S)-6-Allyl-6-phenyl-6H-chromeno[4,3-b]quinoxaline (27):**

Pyrazine **27** was obtained using 1,2-phenylene diamine **22c** (43 mg, 0.40 mmol, 2.5 equiv) for the condensation step. Purification on silica gel (petroleum ether : ethyl acetate = 80 : 20) afforded the title compound **27** as a pale yellow oil (52 mg, 0.15 mmol, 93 %).  $[\alpha]_{\text{D}}^{25}$  ( $c$  2.9,  $\text{CHCl}_3$ ) =  $-174.0^\circ$ .  $er = 93:7$  (ChiralPak AD 1% IPA in hexane, retention time 3.55 : 4.06 min, major : minor).  $^1\text{H}$  NMR (400 MHz,  $\text{CDCl}_3$ )  $\delta$  8.29 (dd,  $J = 7.8, 1.7$  Hz, 1H), 8.20-8.15 (m, 1H), 8.13-8.08 (m, 1H), 7.79-7.71 (m, 2H), 7.42 (ddd,  $J = 8.2, 7.2, 1.7$  Hz, 1H), 7.37 (dd,  $J = 8.4, 1.4$  Hz, 2H), 7.22 (dd,  $J = 8.2, 1.1$  Hz, 1H), 7.21-7.11 (m, 3H), 7.08 (ddd,  $J = 7.8, 7.3, 1.1$  Hz, 1H), 5.95 (app tdd,  $J = 17.1, 10.2, 6.9$  Hz, 1H), 5.18 (dd,  $J = 17.2, 2.2$  Hz, 1H), 5.05 (dd,  $J = 10.2, 2.2$  Hz, 1H), 3.61 (dd,  $J = 14.6, 6.7$  Hz, 1H), 3.27 (dd,  $J = 14.6, 7.2$  Hz, 1H).  $^{13}\text{C}$  NMR (100 MHz,  $\text{CDCl}_3$ )  $\delta$  155.9, 151.1, 143.4, 142.1, 141.8, 141.5, 133.2, 132.8, 130.0, 129.3, 129.1 (2C), 128.0 (2C), 127.4, 126.0 (2C), 125.5, 122.4, 121.3, 118.7, 118.2, 85.4, 45.6. IR  $\nu_{\text{max}}$  (film): 3063, 2980, 2918, 1606, 1588, 1557, 1491, 1461, 1346, 1228, 1109, 1028, 920, 712, 697  $\text{cm}^{-1}$ . HRMS (ESI+)  $m/z$  calculated for  $\text{C}_{24}\text{H}_{19}\text{N}_2\text{O}$  351.1497 found 351.1511 (M+H).

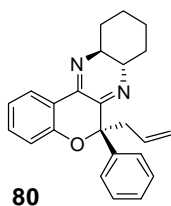

**(6R,7aS,11aS)-6-Allyl-6-phenyl-7a,8,9,10,11,11a-hexahydro-6H-chromeno[3,4-b]quinoxaline (80):**

Diastereomer **80** of dihydropyrazine **28** was obtained using racemic conditions for the rearrangement of allyloxyflavone **5a**. Separation of the two diastereomers was readily accomplished by silica gel chromatography (petroleum ether : ethyl acetate = 90 : 10) affording the title compound **80** as a yellow oil (28 mg, 0.08 mmol, 49 %), along with diastereomer **28** (28 mg, 0.08 mmol, 49 %).  $[\alpha]_{\text{D}}^{25}$  ( $c$  1.3,  $\text{CHCl}_3$ ) =  $+94.2^\circ$ .  $^1\text{H}$  NMR (400 MHz,  $\text{CDCl}_3$ )  $\delta$  7.78 (d,  $J = 7.8$  Hz, 1H), 7.58 (d,  $J = 7.4$  Hz, 2H), 7.40-7.33 (m, 1H), 7.29 (t,  $J = 7.4$  Hz, 2H), 7.22 (t,  $J = 7.3$  Hz, 1H), 7.10 (d,  $J = 8.3$  Hz, 1H), 6.99 (t,  $J = 7.5$  Hz, 1H), 5.79 (dddd,  $J = 17.6, 10.8, 7.2, 6.7$  Hz, 1H), 5.05 (d,  $J = 16.3$  Hz, 1H), 5.04 (d,  $J = 10.1$  Hz, 1H), 3.11 (dd,  $J = 14.4, 7.3$  Hz, 1H), 2.97-2.80 (m, 3H), 2.46 (d,  $J = 11.3$  Hz, 2H), 1.90 (d,  $J = 8.2$  Hz, 2H), 1.61-1.36 (m, 4H).  $^{13}\text{C}$  NMR (100 MHz,  $\text{CDCl}_3$ )  $\delta$  159.7, 156.2, 148.9, 140.8, 132.6, 132.4, 127.9 (2C), 127.4, 126.6 (2C), 125.3, 122.5, 121.7, 119.0, 118.8, 85.3, 59.4, 59.2, 45.2, 33.8 (2C), 30.3, 25.7. IR  $\nu_{\text{max}}$  (film): 3070, 2933, 2857, 1607, 1586, 1575, 1462, 1447, 1320, 1256, 1221, 1055, 992, 918, 697  $\text{cm}^{-1}$ . HRMS (ESI+)  $m/z$  calculated for  $\text{C}_{24}\text{H}_{25}\text{N}_2\text{O}$  357.1967 found 357.1977 (M+H).

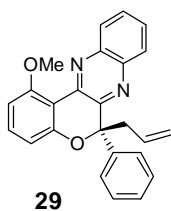

**(S)-6-Allyl-1-methoxy-6-phenyl-6H-chromeno[3,4-b]quinoxaline (29):**

Starting from allyloxyflavone **11** (50 mg, 0.16 mmol, 1.0 equiv), pyrazine **29** was prepared after condensation of the intermediate 3,4-chromanedione with 1,2-phenylene diamine **22c** (43 mg, 0.40 mmol, 2.5 equiv). After purification on silica gel (petroleum ether : ethyl

acetate = 60 : 40), the title compound was obtained as colorless flakes (55 mg, 0.14 mmol, 91 %). M.p. (petroleum ether : Et<sub>2</sub>O) = 184-185 °C.  $[\alpha]_D^{25}$  (*c* 1.0, CHCl<sub>3</sub>) = -75.4°. *er* = 97:3 (ChiralPak AD 1% IPA in hexane, retention time 8.45 : 10.92 min, major : minor). <sup>1</sup>H NMR (400 MHz, CDCl<sub>3</sub>) δ 8.16 (d, *J* = 7.2 Hz, 2H), 7.79-7.70 (m, 2H), 7.35-7.29 (m, 3H), 7.20-7.10 (m, 3H), 6.89 (d, *J* = 8.2 Hz, 1H), 6.62 (d, *J* = 8.4 Hz, 1H), 5.96 (app tdd, *J* = 17.3, 10.2, 7.0 Hz, 1H), 5.17 (d, *J* = 17.2 Hz, 1H), 5.05 (d, *J* = 10.3 Hz, 1H), 3.93 (s, 3H), 3.55 (dd, *J* = 14.6, 6.6 Hz, 1H), 3.27 (dd, *J* = 14.6, 7.3 Hz, 1H). <sup>13</sup>C NMR (100 MHz, CDCl<sub>3</sub>) δ 159.5, 157.7, 151.4, 144.3, 141.8, 141.2, 140.2, 133.3, 132.5, 129.7, 129.5, 129.2, 129.1, 127.9 (2C), 127.3, 126.2 (2C), 118.4, 111.6, 111.4, 106.0, 85.1, 56.3, 45.6. IR  $\nu_{\max}$  (film): 3064, 2973, 2832, 1601, 1586, 1489, 1461, 1472, 1351, 1244, 1102, 1081, 1027, 919, 787, 710 cm<sup>-1</sup>. HRMS (ESI+) *m/z* calculated for C<sub>25</sub>H<sub>21</sub>N<sub>2</sub>O<sub>2</sub> 381.1603 found 381.1621 (M+H).

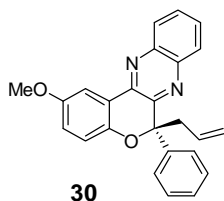

**(S)-6-Allyl-2-methoxy-6-phenyl-6H-chromeno[3,4-b]quinoxaline (30):**

Pyrazine **30** was prepared following the general procedure described above starting from allyloxyflavone **12** (49 mg, 0.16 mmol, 1.0 equiv) and using 1,2-phenylene diamine **22c** (44.0 mg, 0.40 mmol, 2.5 equiv) for the condensation step. After purification on silica gel (petroleum ether : ethyl acetate = 90 : 10), the title compound was obtained as a bright yellow oil (54.8 mg, 0.14 mmol, 90 %).  $[\alpha]_D^{25}$  (*c* 1.1, CHCl<sub>3</sub>) = -153.8°. The *er* value was not determined. <sup>1</sup>H NMR (400 MHz, CDCl<sub>3</sub>) δ 8.18 (d, *J* = 7.1 Hz, 1H), 8.11 (d, *J* = 7.1 Hz, 1H), 7.80-7.71 (m, 3H), 7.35 (d, *J* = 8.0 Hz, 2H), 7.21-7.12 (m, 4H), 7.00 (dd, *J* = 8.9, 3.1 Hz, 1H), 5.95 (app tdd, *J* = 17.0, 10.2, 6.9 Hz, 1H), 5.17 (d, *J* = 17.2 Hz, 1H), 5.04 (d, *J* = 10.3 Hz, 1H), 3.86 (s, 3H), 3.58 (dd, *J* = 14.6, 6.7 Hz, 1H), 3.25 (dd, *J* = 14.6, 7.2 Hz, 1H). <sup>13</sup>C NMR (100 MHz, CDCl<sub>3</sub>) δ 154.9, 151.4, 150.2, 143.5, 142.1, 141.8, 141.5, 133.3, 130.0, 129.4, 129.1 (2C), 128.0 (2C), 127.4, 126.1 (2C), 121.6, 120.9, 119.5, 118.5, 107.5, 85.2, 55.8, 45.5. IR  $\nu_{\max}$  (film): 3067, 2915, 2832, 1495, 1472, 1435, 1273, 1215, 1036, 989, 917, 823, 700 cm<sup>-1</sup>. HRMS (ESI+) *m/z* calculated for C<sub>25</sub>H<sub>21</sub>N<sub>2</sub>O<sub>2</sub> 381.1603 found 381.1612 (M+H).

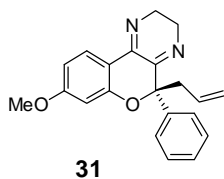

**(S)-5-Allyl-8-methoxy-5-phenyl-3,5-dihydro-2H-chromeno[4,3-b]pyrazine (31):**

Starting from the 7-methoxy-allyloxyflavone **13** (49 mg, 0.16 mmol, 1.0 equiv) and following the general procedure described above using 1,2-ethylene diamine **24** (27 μL, 0.40 mmol, 2.5 equiv) for the condensation step, dihydropyrazine **31** was obtained after purification on silica gel (petroleum ether : ethyl acetate = 50 : 50) as a yellow gum (49 mg, 0.15 mmol, 93 %).  $[\alpha]_D^{25}$  (*c* 1.3, CHCl<sub>3</sub>) = +134.1°. *er* = 90:10 (ChiralPak AD 8% IPA in hexane, retention time 4.82 : 7.68 min, major : minor). <sup>1</sup>H NMR (400 MHz, CDCl<sub>3</sub>) δ 7.74 (d, *J* = 8.8 Hz, 1H), 7.30-7.15 (m, 5H), 6.61 (d, *J* = 2.4 Hz, 1H), 6.54 (dd, *J* = 8.8, 2.5 Hz, 1H), 5.92-5.79 (m, 1H), 5.05 (d, *J* = 16.5 Hz, 1H), 5.05 (d, *J* = 10.9 Hz, 1H), 4.08 (ddd, *J* = 15.7, 5.1, 2.2 Hz, 1H), 3.92 (ddd, *J* = 16.3, 5.2, 2.2 Hz, 1H), 3.85 (s, 3H), 3.40 (ddd, *J* = 17.3, 16.1, 5.2 Hz, 1H), 3.26 (ddd, *J* = 17.3, 16.1, 5.1 Hz, 1H), 3.12 (dd, *J* = 14.7, 6.5 Hz, 1H), 2.90 (dd, *J* = 14.7, 7.4 Hz, 1H). <sup>13</sup>C NMR (100 MHz, CDCl<sub>3</sub>) δ 163.9, 159.0, 157.5, 149.1, 139.6, 132.8, 128.4 (2C), 127.7, 126.2, 125.9 (2C), 118.4, 113.3, 110.2, 101.8, 85.9, 55.5, 46.1, 44.4, 43.7. IR  $\nu_{\max}$  (film): 3074, 2927, 2840, 1615, 1590, 1502, 1432, 1329, 1268, 1162, 1116, 1034, 996, 836 cm<sup>-1</sup>. HRMS (ESI+) *m/z* calculated for C<sub>21</sub>H<sub>21</sub>N<sub>2</sub>O<sub>2</sub> 333.1603 found 333.1610 (M+H).

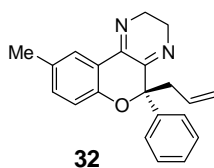

**(S)-5-Allyl-9-methyl-5-phenyl-3,5-dihydro-2H-chromeno[4,3-b]pyrazine (32):**

Starting from the 6-methyl-allyloxyflavone **14** (47 mg, 0.16 mmol) and following the general procedure described above using 1,2-ethylene diamine **24** (27  $\mu$ L, 0.40 mmol, 2.5 equiv) for the condensation step, dihydropyrazine **32** was obtained after purification on silica gel (petroleum ether : ethyl acetate = 80 : 20) as a yellow gum (45 mg, 0.14 mmol, 88 %).  $[\alpha]_D^{25}$  (*c* 1.2,  $\text{CHCl}_3$ ) = + 53.5°. *er* = 96:4 (ChiralPak AD 1% IPA in Hexane, retention time 7.82 : 9.32 min, minor : major).  $^1\text{H}$  NMR (400 MHz,  $\text{CDCl}_3$ )  $\delta$  7.64 (br s, 1H), 7.29-7.15 (m, 6H), 7.03 (d, *J* = 8.4 Hz, 1H), 5.92-5.80 (m, 1H), 5.05 (d, *J* = 15.7 Hz, 1H), 5.05 (d, *J* = 11.8 Hz, 1H), 4.13-4.06 (m, 1H), 4.01-3.93 (m, 1H), 3.47-3.25 (m, 2H), 3.11 (dd, *J* = 14.7, 6.5 Hz, 1H), 2.90 (dd, *J* = 14.7, 7.3 Hz, 1H), 2.24 (s, 3H).  $^{13}\text{C}$  NMR (100 MHz,  $\text{CDCl}_3$ )  $\delta$  159.2, 154.0, 149.8, 139.4, 134.1, 132.7, 131.4, 128.2 (2C), 127.6, 126.0 (2C), 124.6, 119.5, 118.3, 118.1, 85.4, 45.8, 44.5, 43.6, 20.5. IR  $\nu_{\text{max}}$  (film): 3074, 3025, 2944, 2841, 1591, 1487, 1447, 1221, 1131, 990, 915, 818  $\text{cm}^{-1}$ . HRMS (ESI+) *m/z* calculated for  $\text{C}_{21}\text{H}_{21}\text{N}_2\text{O}$  317.1654 found 317.1640 (M+H).

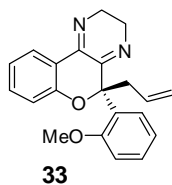

**(S)-5-Allyl-5-(2-methoxyphenyl)-3,5-dihydro-2H-chromeno[4,3-b]pyrazine (33):**

Starting from the *o*-methoxy-allyloxyflavone **15** (49.3 mg, 0.16 mmol) and following the general procedure described above using 1,2-ethylene diamine **24** (27  $\mu$ L, 0.40 mmol, 2.5 equiv) for the condensation step, the title compound **33** was obtained after purification on silica gel (petroleum ether : ethyl acetate = 50 : 50) as a bright yellow oil (51 mg, 0.15 mmol, 96 %).  $[\alpha]_D^{25}$  (*c* 1.0,  $\text{CHCl}_3$ ) = + 29.4°. *er* = 96:4 (ChiralPak AD 8% IPA in hexane, retention time 4.60 : 5.59 min, minor : major).  $^1\text{H}$  NMR (400 MHz,  $\text{CDCl}_3$ )  $\delta$  7.87 (br d, *J* = 7.5 Hz, 1H), 7.42 (d, *J* = 7.8 Hz, 1H), 7.34 (t, *J* = 7.8 Hz, 1H), 7.23 (t, *J* = 7.8 Hz, 1H), 7.00-6.93 (m, 2H), 6.89 (t, *J* = 7.6 Hz, 1H), 6.82 (d, *J* = 8.2 Hz, 1H), 5.85 (app tdd, *J* = 13.9, 10.1, 7.0 Hz, 1H), 5.07 (d, *J* = 17.2 Hz, 1H), 5.00 (d, *J* = 10.2 Hz, 1H), 3.79 (app d, *J* = 10.8 Hz, 2H), 3.60 (s, 3H), 3.41 (app d, *J* = 10.3 Hz, 2H), 3.22 (dd, *J* = 14.1, 6.7 Hz, 1H), 3.15 (dd, *J* = 14.0, 7.3 Hz, 1H).  $^{13}\text{C}$  NMR (100 MHz,  $\text{CDCl}_3$ )  $\delta$  161.0, 157.1, 156.5, 150.2, 132.7, 132.4, 129.5, 128.8, 127.7, 124.7, 121.5, 120.4, 119.9, 118.7, 117.8, 111.6, 84.1, 55.0, 45.7, 44.6, 42.0. IR  $\nu_{\text{max}}$  (film): 3074, 2940, 2836, 1595, 1576, 1490, 1460, 1435, 1330, 1248, 1116, 1028, 991, 917  $\text{cm}^{-1}$ . HRMS (ESI+) *m/z* calculated for  $\text{C}_{21}\text{H}_{21}\text{N}_2\text{O}_2$  333.1603 found 333.1625 (M+H).

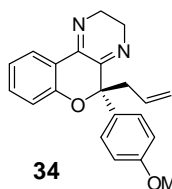

**(S)-5-Allyl-5-(4-methoxyphenyl)-3,5-dihydro-2H-chromeno[4,3-b]pyrazine (34):**

Starting from the *p*-methoxy-allyloxyflavone **16** (49 mg, 0.16 mmol) and following the general procedure described above using 1,2-ethylene diamine **24** (27  $\mu$ L, 0.40 mmol, 2.5 equiv) for the condensation step, the title compound **34** was obtained as a yellow oil (50 mg, 0.15 mmol, 94 %) after purification on silica gel (petroleum ether : ethyl acetate = 20 : 80).  $[\alpha]_D^{25}$  (*c* 1.0,  $\text{CHCl}_3$ ) = + 9.0°. *er* = 98:2 (ChiralCel OD 1% IPA in hexane, retention time 6.21 : 7.75 min, major : minor).  $^1\text{H}$  NMR (400 MHz,  $\text{CDCl}_3$ )  $\delta$  7.83 (dd, *J* = 7.9, 1.6 Hz, 1H), 7.37 (ddd, *J* = 8.6, 7.4, 1.6 Hz, 1H), 7.18 (d, *J* = 8.6 Hz, 2H), 7.10 (d, *J* = 8.3 Hz, 1H), 6.95 (app t, *J* = 7.5 Hz, 1H), 6.76 (d, *J* = 8.7 Hz, 2H), 5.94-5.81 (m, 1H), 5.05 (d, *J* = 15.9 Hz, 1H), 5.05 (d, *J* = 11.5 Hz, 1H), 4.10-3.93 (m, 2H), 3.72 (s, 3H), 3.47-3.25 (m, 2H), 3.10 (dd, *J* = 14.7, 6.5 Hz, 1H), 2.90 (dd, *J* = 14.7, 7.4 Hz, 1H).  $^{13}\text{C}$  NMR (100 MHz,  $\text{CDCl}_3$ )  $\delta$  159.0 (2C), 156.0, 149.8, 133.0, 132.8, 131.2, 127.3 (2C), 124.8, 121.9, 120.1,

118.3 (2C), 113.8 (2C), 85.3, 55.1, 45.9, 44.6, 43.7. IR  $\nu_{\max}$  (film): 3074, 2948, 2836, 1608, 1594, 1510, 1461, 1331, 1251, 1177, 1033, 993, 829  $\text{cm}^{-1}$ . HRMS (ESI+)  $m/z$  calculated for  $\text{C}_{21}\text{H}_{21}\text{N}_2\text{O}_2$  333.1603 found 333.1570 (M+H).

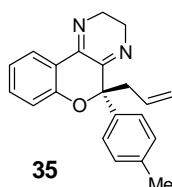

**(S)-5-Allyl-5-*p*-tolyl-3,5-dihydro-2H-chromeno[4,3-*b*]pyrazine (35):**

Starting from the *p*-tolyl-allyloxyflavone **17** (47 mg, 0.16 mmol) and following the general procedure described above using 1,2-ethylene diamine **24** (27  $\mu\text{L}$ , 0.40 mmol, 2.5 equiv) for the condensation step, the title compound **35** was obtained after purification on silica gel (petroleum ether : ethyl acetate = 75 : 15) as a yellow oil (48 mg, 0.15 mmol, 94 %).  $[\alpha]_{\text{D}}^{25}$  ( $c$  1.0,  $\text{CHCl}_3$ ) = + 14.4°.  $er = 96:4$  (ChiralCel OD 1% IPA in Hexane, retention time 3.88 : 4.55 min, major : minor).  $^1\text{H}$  NMR (400 MHz,  $\text{CDCl}_3$ )  $\delta$  7.83 (br d,  $J = 6.1$  Hz, 1H), 7.37 (app t,  $J = 7.7$  Hz, 1H), 7.15 (dd,  $J = 8.2, 2.3$  Hz, 2H), 7.11 (d,  $J = 8.4$  Hz, 1H), 7.03 (d,  $J = 8.2$  Hz, 2H), 6.95 (app t,  $J = 7.5$  Hz, 1H), 5.87 (dddd,  $J = 17.2, 10.5, 7.2, 6.6$  Hz, 1H), 5.06 (d,  $J = 17.5$  Hz, 1H), 5.05 (d,  $J = 10.2$  Hz, 1H), 4.08 (br d,  $J = 14.6$  Hz, 1H), 3.98 (br d,  $J = 14.0$  Hz, 1H), 3.50-3.22 (m, 2H), 3.10 (dd,  $J = 14.7, 6.5$  Hz, 1H), 2.89 (dd,  $J = 14.7, 7.3$  Hz, 1H), 2.24 (s, 3H).  $^{13}\text{C}$  NMR (100 MHz,  $\text{CDCl}_3$ )  $\delta$  159.0, 156.0, 149.7, 137.4, 136.3, 133.0, 132.8, 129.1 (2C), 128.3, 125.9 (2C), 124.8, 121.9, 120.0, 118.3, 85.5, 45.9, 44.5, 43.6, 20.9. IR  $\nu_{\max}$  (film): 3073, 2939, 2839, 1608, 1594, 1576, 1462, 1330, 1220, 1117, 992, 917, 813  $\text{cm}^{-1}$ . HRMS (ESI+)  $m/z$  calculated for  $\text{C}_{21}\text{H}_{21}\text{N}_2\text{O}$  317.1654 found 317.1645 (M+H).

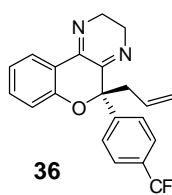

**(S)-5-Allyl-5-(4-(trifluoromethyl)phenyl)-3,5-dihydro-2H-chromeno[4,3-*b*]pyrazine (36):**

Dihydropyrazine **36** was obtained from the rearrangement of the *p*-trifluoromethylphenyl-allyloxyflavone **18** (55 mg, 0.16 mmol, 1.0 equiv), after condensation of the intermediate 3,4-chromanedione with 1,2-ethylene diamine **24** (27  $\mu\text{L}$ , 0.40 mmol, 2.5 equiv). Purification on silica gel (petroleum ether : ethyl acetate = 80 : 20) afforded the title compound **36** as a bright yellow oil (51 mg, 0.14 mmol, 86 %).  $[\alpha]_{\text{D}}^{25}$  ( $c$  1.0,  $\text{CHCl}_3$ ) = + 24.0°.  $er = 95:5$  (ChiralPak AD 1% IPA in hexane, retention time 4.79 : 5.42 min, major : minor).  $^1\text{H}$  NMR (400 MHz,  $\text{CDCl}_3$ )  $\delta$  7.84 (d,  $J = 7.9$  Hz, 1H), 7.51 (d,  $J = 8.8$  Hz, 2H), 7.42 (d,  $J = 8.9$  Hz, 2H), 7.39 (d,  $J = 8.9$  Hz, 1H), 7.14 (d,  $J = 8.3$  Hz, 1H), 6.99 (app t,  $J = 7.6$  Hz, 1H), 5.83 (app tdd,  $J = 17.2, 10.1, 6.8$  Hz, 1H), 5.05 (d,  $J = 9.5$  Hz, 1H), 5.04 (d,  $J = 17.0$  Hz, 1H), 4.12-3.94 (m, 2H), 3.45 (app dt,  $J = 16.5, 5.6$  Hz, 1H), 3.32 (app dt,  $J = 16.5, 5.3$  Hz, 1H), 3.13 (dd,  $J = 14.7, 6.5$  Hz, 1H), 2.91 (dd,  $J = 14.7, 7.5$  Hz, 1H).  $^{13}\text{C}$  NMR (100 MHz,  $\text{CDCl}_3$ )  $\delta$  158.6, 155.6, 149.2, 143.6, 133.3, 132.0, 130.5-129.5 (q,  $J = 32.6$  Hz, 1C), 126.5 (2C), 125.4-125.3 (q,  $J = 3.7$  Hz, 2C), 125.0, 127.9-119.8 (q,  $J = 272.2$  Hz, 1C), 122.4, 120.0, 119.1, 118.2, 85.4, 45.8, 44.6, 43.6. IR  $\nu_{\max}$  (film): 3076, 2948, 2839, 1608, 1594, 1461, 1410, 1327, 1219, 1167, 1125, 1068, 1017, 994, 834  $\text{cm}^{-1}$ . HRMS (ESI+)  $m/z$  calculated for  $\text{C}_{21}\text{H}_{18}\text{F}_3\text{N}_2\text{O}$  371.1371 found 371.1380 (M+H).

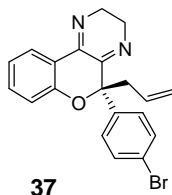

**(S)-5-Allyl-5-(4-bromophenyl)-3,5-dihydro-2H-chromeno[4,3-*b*]pyrazine (37):**

Dihydropyrazine **37** was obtained from the rearrangement of *p*-bromophenyl-allyloxyflavone **19** (57 mg, 0.16 mmol, 1.0 equiv), after condensation of

the intermediate 3,4-chromanedione with 1,2-ethylene diamine **24** (27  $\mu\text{L}$ , 0.40 mmol, 2.5 equiv). Purification on silica gel (petroleum ether : ethyl acetate = 80 : 20) afforded the title compound **37** as a bright yellow oil (57 mg, 0.15 mmol, 93 %).  $[\alpha]_{\text{D}}^{25}$  ( $c$  1.0,  $\text{CHCl}_3$ ) =  $-13.9^\circ$ ; er = 91:9 (ChiralCel OD 1% IPA in hexane, retention time 4.51 : 5.45 min, major : minor).  $^1\text{H NMR}$  (400 MHz,  $\text{CDCl}_3$ )  $\delta$  7.84 (d,  $J$  = 7.6 Hz, 1H), 7.39 (app t,  $J$  = 7.8 Hz, 1H), 7.37 (d,  $J$  = 8.8 Hz, 2H), 7.15 (d,  $J$  = 8.8 Hz, 2H), 7.11 (d,  $J$  = 8.3 Hz, 1H), 6.98 (app t,  $J$  = 7.6 Hz, 1H), 5.84 (dddd,  $J$  = 16.9, 10.5, 7.4, 6.5 Hz, 1H), 5.05 (d,  $J$  = 10.4 Hz, 1H), 5.04 (d,  $J$  = 17.2 Hz, 1H), 4.12-4.03 (m, 1H), 4.02-3.94 (m, 1H), 3.42 (app dt,  $J$  = 16.9, 5.4 Hz, 1H), 3.31 (app dt,  $J$  = 16.2, 5.0 Hz, 1H), 3.09 (dd,  $J$  = 14.7, 6.4 Hz, 1H), 2.88 (dd,  $J$  = 14.7, 7.5 Hz, 1H).  $^{13}\text{C NMR}$  (100 MHz,  $\text{CDCl}_3$ )  $\delta$  158.6, 155.6, 149.3, 138.5, 133.1, 132.2, 131.5 (2C), 127.8 (2C), 124.9, 122.2, 121.9, 120.0, 118.9, 118.2, 85.2, 45.8, 44.5, 43.5. IR  $\nu_{\text{max}}$  (film): 3073, 2942, 2836, 1608, 1593, 1577, 1479, 1461, 1330, 1217, 1118, 1009, 993, 918, 820, 777  $\text{cm}^{-1}$ . HRMS (ESI+)  $m/z$  calculated for  $\text{C}_{20}\text{H}_{18}\text{BrN}_2\text{O}$  381.0602 found 381.0605 (M+H).

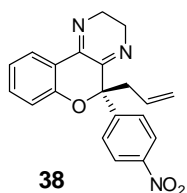

**(S)-5-Allyl-5-(4-nitrophenyl)-3,5-dihydro-2H-chromeno[4,3-b]pyrazine (38):**

Starting from the *p*-nitrophenyl-allyloxyflavone **20** (52 mg, 0.16 mmol) and following the general procedure described above using 1,2-ethylene diamine **24** (27  $\mu\text{L}$ , 0.40 mmol, 2.5 equiv) for the condensation step, dihydropyrazine **38** was obtained after purification on silica gel (petroleum ether : ethyl acetate = 70 : 30) as a bright yellow oil (51 mg, 0.15 mmol, 92 %).  $[\alpha]_{\text{D}}^{25}$  ( $c$  1.0,  $\text{CHCl}_3$ ) =  $+4.1^\circ$ . er = 96:4 (ChiralPak AD 10% IPA in Hexane, retention time 6.29 : 8.01 min, major : minor).  $^1\text{H NMR}$  (400 MHz,  $\text{CDCl}_3$ )  $\delta$  8.11 (d,  $J$  = 8.9 Hz, 2H), 7.86 (d,  $J$  = 7.8 Hz, 1H), 7.49 (d,  $J$  = 9.0 Hz, 2H), 7.43 (app t,  $J$  = 7.8 Hz, 1H), 7.15 (d,  $J$  = 8.1 Hz, 1H), 7.01 (app t,  $J$  = 7.5 Hz, 1H), 5.83 (dddd,  $J$  = 16.9, 10.3, 7.7, 6.4 Hz, 1H), 5.05 (d,  $J$  = 10.4 Hz, 1H), 5.02 (d,  $J$  = 17.1 Hz, 1H), 4.08 (ddd,  $J$  = 15.7, 5.1, 3.4 Hz, 1H), 3.99 (ddd,  $J$  = 16.7, 5.2, 3.3 Hz, 1H), 3.48 (app dt,  $J$  = 16.6, 5.6 Hz, 1H), 3.35 (app dt,  $J$  = 16.6, 5.3 Hz, 1H), 3.14 (dd,  $J$  = 14.6, 6.3 Hz, 1H), 2.92 (dd,  $J$  = 14.6, 7.7 Hz, 1H).  $^{13}\text{C NMR}$  (100 MHz,  $\text{CDCl}_3$ )  $\delta$  158.3, 155.3, 148.9, 147.3, 146.8, 133.4, 131.5, 127.2 (2C), 125.0, 123.5 (2C), 122.6, 119.8, 119.5, 118.2, 85.3, 45.8, 44.5, 43.4. IR  $\nu_{\text{max}}$  (film): 3076, 2948, 2845, 1609, 1593, 1521, 1461, 1347, 1218, 1118, 995, 853  $\text{cm}^{-1}$ . HRMS (ESI+)  $m/z$  calculated for  $\text{C}_{20}\text{H}_{18}\text{N}_3\text{O}_3$  348.1348 found 348.1361 (M+H).

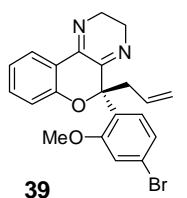

**(S)-5-Allyl-5-(4-bromo-2-methoxyphenyl)-3,5-dihydro-2H-chromeno[4,3-b]pyrazine (39):**

Starting from allyloxyflavone **21** (62 mg, 0.16 mmol, 1.0 equiv) and using 1,2-ethylene diamine **24** (27  $\mu\text{L}$ , 0.40 mmol, 2.5 equiv) for the condensation of the 3,4-chromanedione intermediate, the title dihydropyrazine **39** was obtained as a bright yellow oil (53 mg, 0.13 mmol, 80 %), after purification on silica gel (petroleum ether : ethyl acetate = 60 : 40).  $[\alpha]_{\text{D}}^{25}$  ( $c$  1.0,  $\text{CHCl}_3$ ) =  $-8.6^\circ$ ; er = 96:4 (ChiralPak AD 8% IPA in hexane, retention time 4.29 : 7.71 min, minor : major).  $^1\text{H NMR}$  (400 MHz,  $\text{CDCl}_3$ )  $\delta$  7.87 (d,  $J$  = 7.8 Hz, 1H), 7.35 (app t,  $J$  = 7.8 Hz, 1H), 7.28 (d,  $J$  = 8.7 Hz, 1H), 7.03 (d,  $J$  = 8.4 Hz, 1H), 7.01-6.93 (m, 2H), 6.94 (s, 1H), 5.89-5.76 (m, 1H), 5.05 (d,  $J$  = 17.2 Hz, 1H), 5.01 (d,  $J$  = 12.5 Hz, 1H), 3.79 (app d,  $J$  = 12.2 Hz, 2H), 3.61 (s, 3H), 3.46-3.36 (m, 2H), 3.17 (dd,  $J$  = 14.1, 6.9 Hz, 1H), 3.09 (dd,  $J$  = 14.1, 7.2 Hz, 1H).  $^{13}\text{C NMR}$  (100 MHz,  $\text{CDCl}_3$ )  $\delta$  160.4, 157.8, 156.2, 150.0, 132.9, 132.1, 129.1, 127.9, 124.8, 123.5, 123.0, 121.8, 119.9, 119.0, 117.8, 115.3,

83.9, 55.4, 45.8, 44.6, 41.6. IR  $\nu_{\max}$  (film): 3075, 2940, 2841, 1593, 1487, 1460, 1393, 1330, 1247, 1116, 1028, 991, 917, 850  $\text{cm}^{-1}$ . HRMS (ESI+)  $m/z$  calculated for  $\text{C}_{21}\text{H}_{20}\text{BrN}_2\text{O}_2$  411.0708 found 411.0725 (M+H).

## VIII. Mechanistic Studies

### Experimental Procedures and Characterization Data for Rearrangement of Deuterium-labeled Substrates and Crossover Experiment.

$^1\text{H}$  NMR (400 MHz,  $\text{CDCl}_3$ ,  $\delta$  7.27)

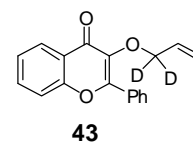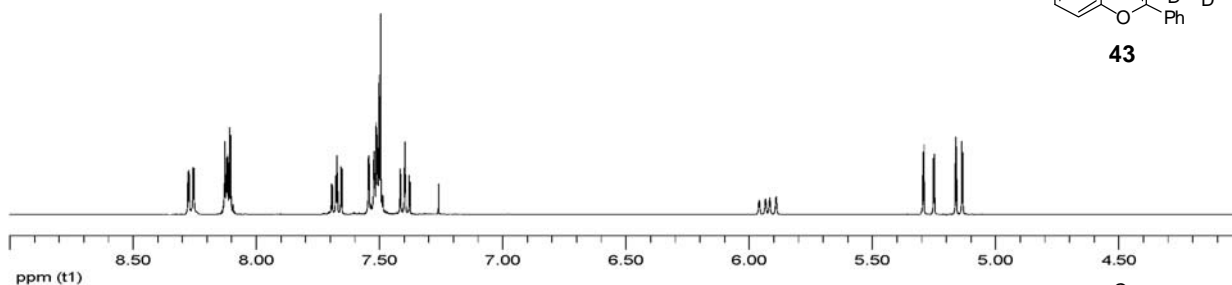

$^1\text{H}$  NMR (400 MHz,  $\text{CDCl}_3$ ,  $\delta$  7.27)

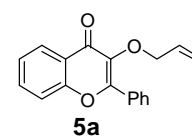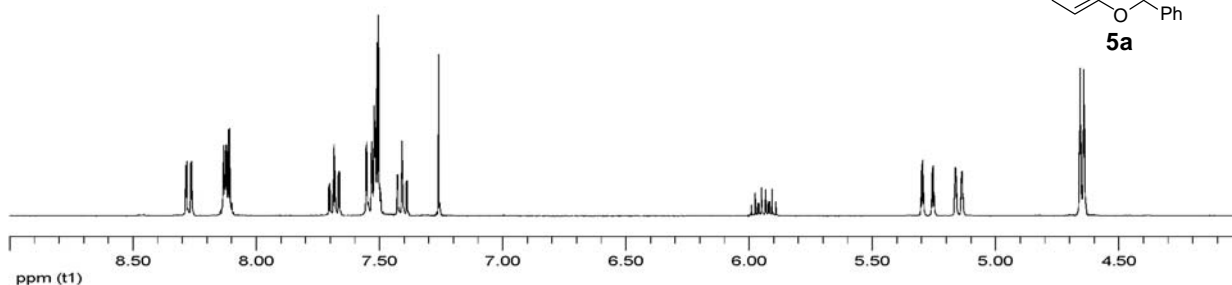

$^1\text{H}$  NMR (400 MHz,  $\text{CDCl}_3$ ,  $\delta$  7.27)

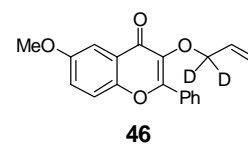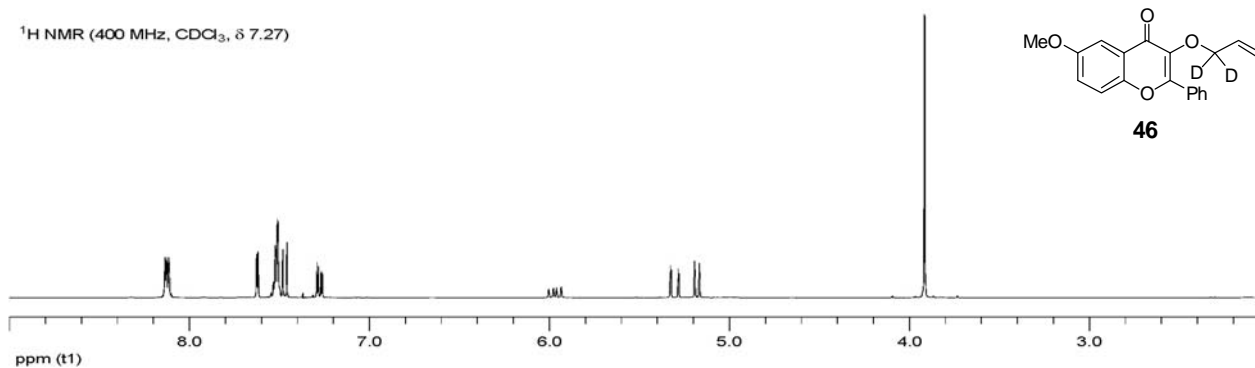

$^1\text{H}$  NMR (400 MHz,  $\text{CDCl}_3$ ,  $\delta$  7.27)

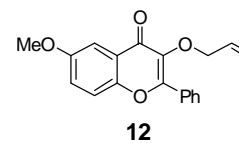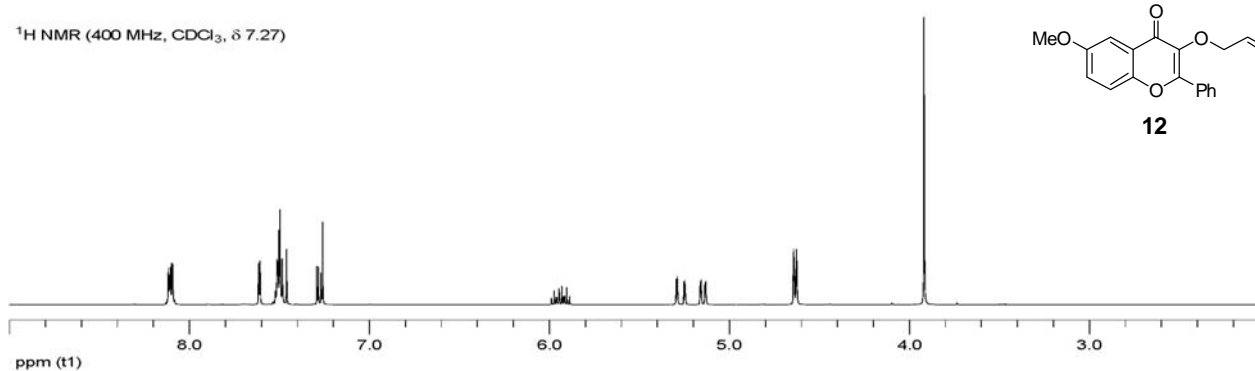



**Equation (1) – Rearrangement of Allyloxy Flavone **43**:** Starting from d<sub>2</sub>-allyloxyflavone **43** (40 mg, 0.14 mmoles, 1.0 equiv) and following the same procedure as described for the preparation of **25**, the bis-deuterated dichloropyrazine **45** was isolated after purification on silica gel (petroleum ether : dichloromethane = 98 : 2) as a yellow solid (59 mg, 0.14 mmol, 98 %). <sup>1</sup>H NMR spectrum shown on page S25 clearly shows complete transfer of the deuterium atoms to the terminal position of the double bond during the rearrangement process.

<sup>1</sup>H NMR (400 MHz, CDCl<sub>3</sub>, δ 7.27)

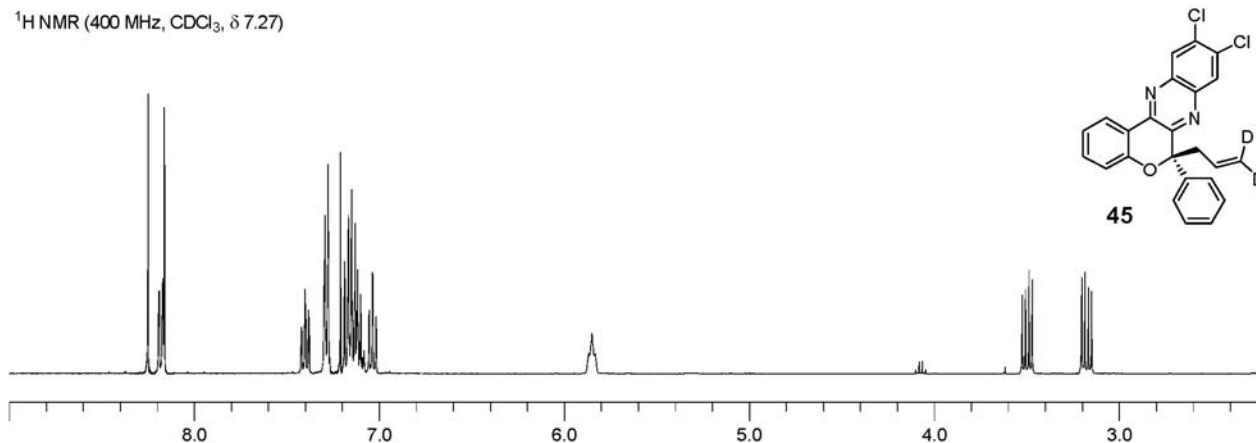

<sup>1</sup>H NMR (400 MHz, CDCl<sub>3</sub>, δ 7.27)

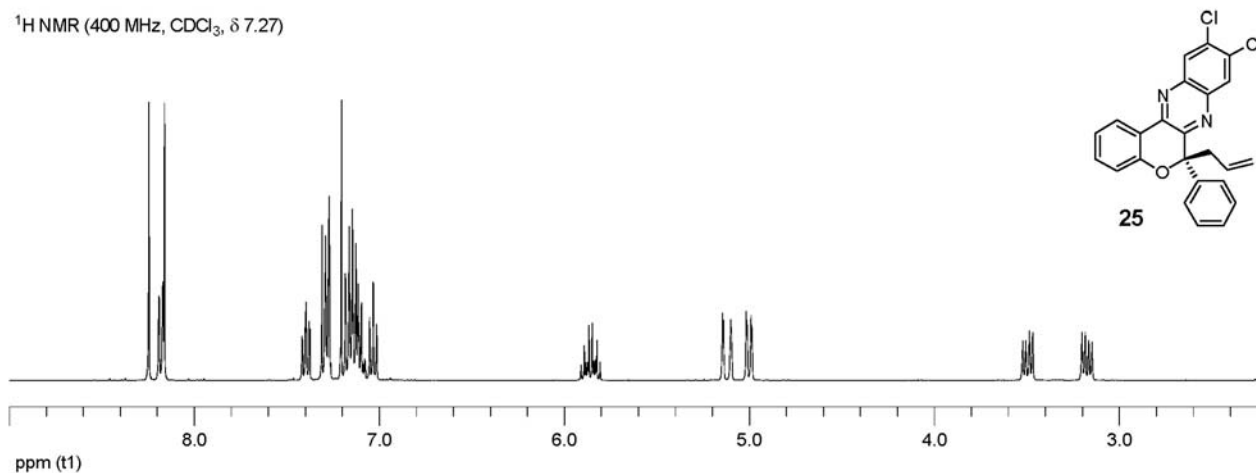

### Equation (2) – Crossover Experiment

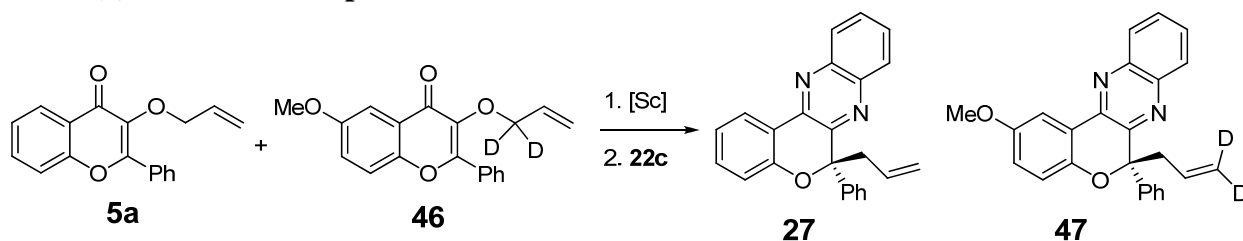

A mixture of non-labeled allyloxyflavone **5a** (22 mg, 0.08 mmol, 1.0 equiv) and deuterated methoxyallyloxyflavone **46** (25 mg, 0.08 mmol, 1.0 equiv) was subjected to the rearrangement conditions as described above (see **General Procedure § VII** (page S17)). After quenching the intermediate

3,4-chromanediones with diamine **22c** (43 mg, 0.40 mmol, 2.5 equiv), the sieves were removed by filtration and the crude was concentrated. UPLC analysis performed on the crude mixture. LC separation was performed on a Waters Acquity UPLC using a BEH C18 column (2.1 x 100 mm/1.7  $\mu$ M) and an isocratic method with 70:30 acetonitrile/water (0.01% formic acid).

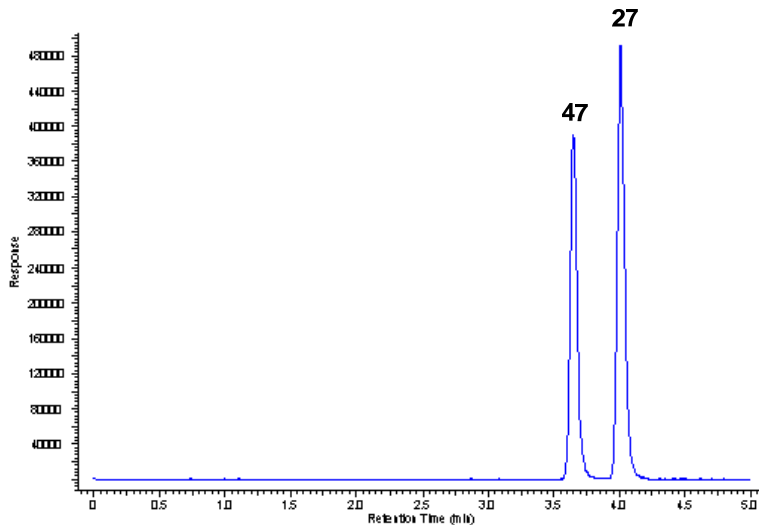

Peak 1 (3.7 min)

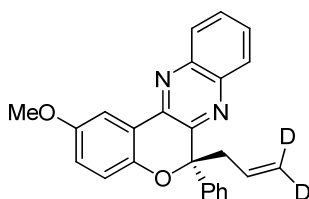

Exact Mass: 382.17

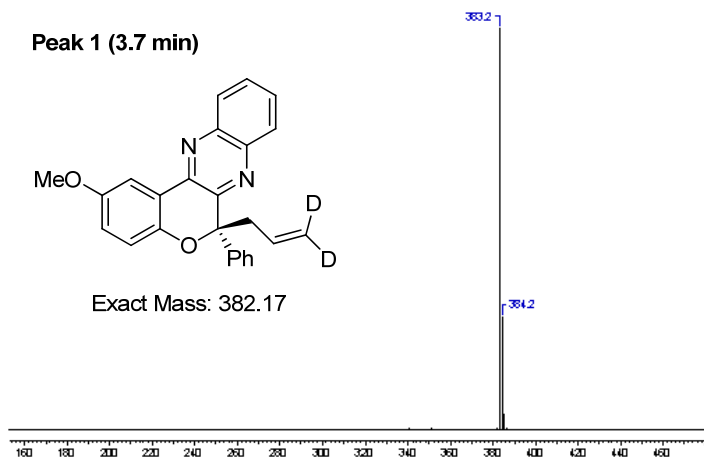

Peak 2 (4.0 min)

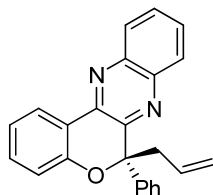

Exact Mass: 350.14

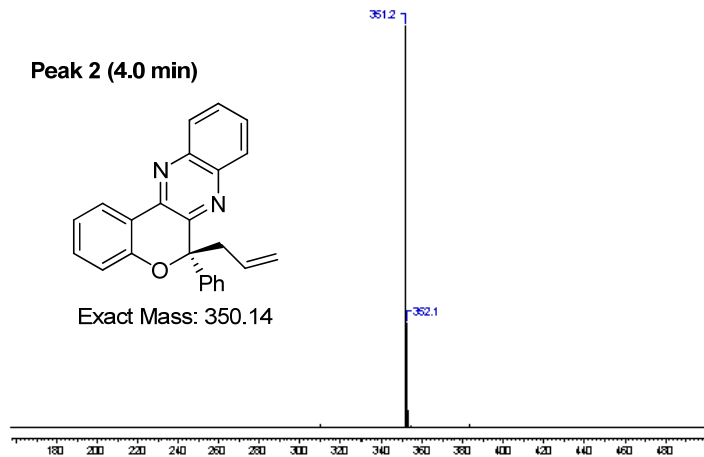

## UV/Fluorescence Studies

### Compound Synthesis

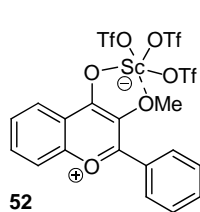

#### 3-Methoxy-2-phenyl-4H-chromen-4-one, scandium triflate complex (**52**):

To a suspension of molecular sieves (4Å, 10.0 mg, flame-dried under high vacuum) was subsequently added CD<sub>2</sub>Cl<sub>2</sub> (1.0 mL), 3-methoxy-2-phenyl-4H-chromen-4-one **53** (10.0 mg, 0.04 mmol) and scandium triflate (9.8 mg, 0.02 mmol). The mixture was stirred at room temperature for 0.5 h, and filtered through a pad of Celite to remove undissolved solid. The clear solution was used for NMR and UV/fluorescence studies without further purification. <sup>1</sup>H NMR (400 MHz, CD<sub>2</sub>Cl<sub>2</sub>) δ 8.58 (br, 1H), 8.19 (d, *J* = 6.4 Hz, 2H), 7.99 (dd, *J* = 7.7 Hz, 1H), 7.86 (d, *J* = 8.1 Hz, 1H), 7.69 (dd, *J* = 6.8 Hz, 1H), 7.61 (dd, *J* = 7.6 Hz, 3H), 3.79 (s, 3H). <sup>13</sup>C NMR (400 MHz, CD<sub>2</sub>Cl<sub>2</sub>) δ 177.6, 165.0, 157.2, 142.2, 137.9, 134.3, 130.0, 129.3, 128.1, 124.0, 120.3, 119.2, 62.5, -4.5. IR<sub>max</sub> (film): 3284(br), 1601, 1245, 1166, 1035, 757, 643 cm<sup>-1</sup>.

#### 6-Allyl-6-(2-methoxyphenyl)-6H-chromeno[3,4-b]quinoxaline (**81**):

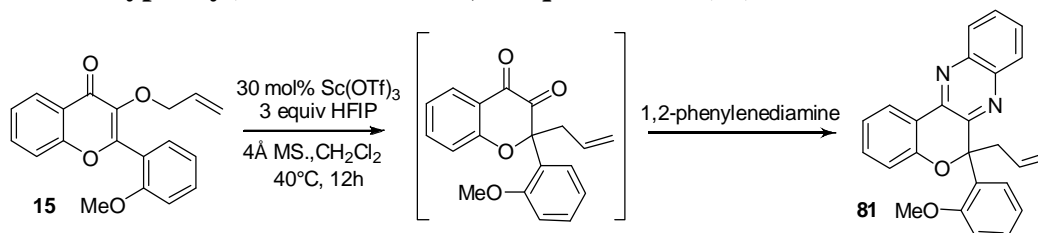

To a suspension of molecular sieves (4Å, 20.0 mg, flame-dried under high vacuum) was subsequently added a solution of 3-(allyloxy)-2-(2-methoxyphenyl)-4H-chromen-4-one **15** (10.0 mg, 0.03 mmol) in CH<sub>2</sub>Cl<sub>2</sub> (1 mL), 1,1,1,3,3,3-Hexafluoro-2-propanol (10 μL, 0.09 mmol) and scandium triflate (4.8 mg, 0.01 mmol). The mixture was stirred overnight at 40 °C. 1,2-Phenylene diamine (8.1 mg, 0.07 mmol) was added in one portion and the mixture was allowed to stir for 2 h at room temperature. After removal of molecular sieves by filtration through a pad of Celite, the solvent was evaporated *in vacuo* and the product **81** was isolated by flash column chromatography on silica gel.<sup>S7</sup> <sup>1</sup>H NMR (400 MHz, CDCl<sub>3</sub>) δ 8.40 (dd, *J* = 7.8, 1.7 Hz, 1H), 8.07 (dd, *J* = 8.4, 1.5 Hz, 1H), 7.91 (dd, *J* = 8.3, 1.6 Hz, 1H), 7.68 (ddd, *J* = 8.3, 6.9, 1.5 Hz, 1H), 7.60 (ddd, *J* = 8.4, 6.9, 1.6 Hz, 1H), 7.46 (dd, *J* = 7.8, 1.6 Hz, 1H), 7.35 (ddd, *J* = 8.7, 7.2, 1.7 Hz, 1H), 7.29-7.25 (m, 1H), 7.09-7.04 (m, 1H), 6.97-6.93 (m, 2H), 6.80 (dd, *J* = 8.1, 0.9 Hz, 1H), 5.90 (dddd, *J* = 17.1, 10.2, 7.0, 7.0 Hz, 1H), 5.03 (dd, *J* = 17.1, 1.9 Hz, 1H), 4.93 (dd, *J* = 10.2, 1.9 Hz, 1H), 3.48 (m, 2H), 3.32 (m, 3H). <sup>13</sup>C NMR (400 MHz, CDCl<sub>3</sub>) δ 157.8, 156.6, 153.1, 143.8, 141.7, 141.7, 132.5, 132.5, 131.6, 129.7, 129.4, 129.1, 128.9, 128.5, 127.4, 125.1, 121.4, 120.0, 119.1, 117.2, 112.4, 84.4, 55.5, 43.9. IR<sub>max</sub> (film): 3061, 2921, 2357, 1603, 1587, 1491, 1459, 1247, 1029, 752

<sup>S7</sup> For use of HFIP with Sc(OTf)<sub>3</sub>-chiral ligand complexes, see: Kitajima, H.; Ito, K.; Katsuki, T. *Tetrahedron*, **1997**, 33, 17015-17028.

cm<sup>-1</sup>. HRMS (ESI+) m/z calculated for C<sub>25</sub>H<sub>21</sub>N<sub>2</sub>O<sub>2</sub> 381.1603 found 381.1618 (M+H).

### Fluorescence Experiments

Fluorescence spectra were recorded on a Fluorimeter. The spectra in CH<sub>2</sub>Cl<sub>2</sub> solution were obtained at 25 °C using a quartz cuvette with a path length of 1 cm (excitation wavelength = 400 nm).

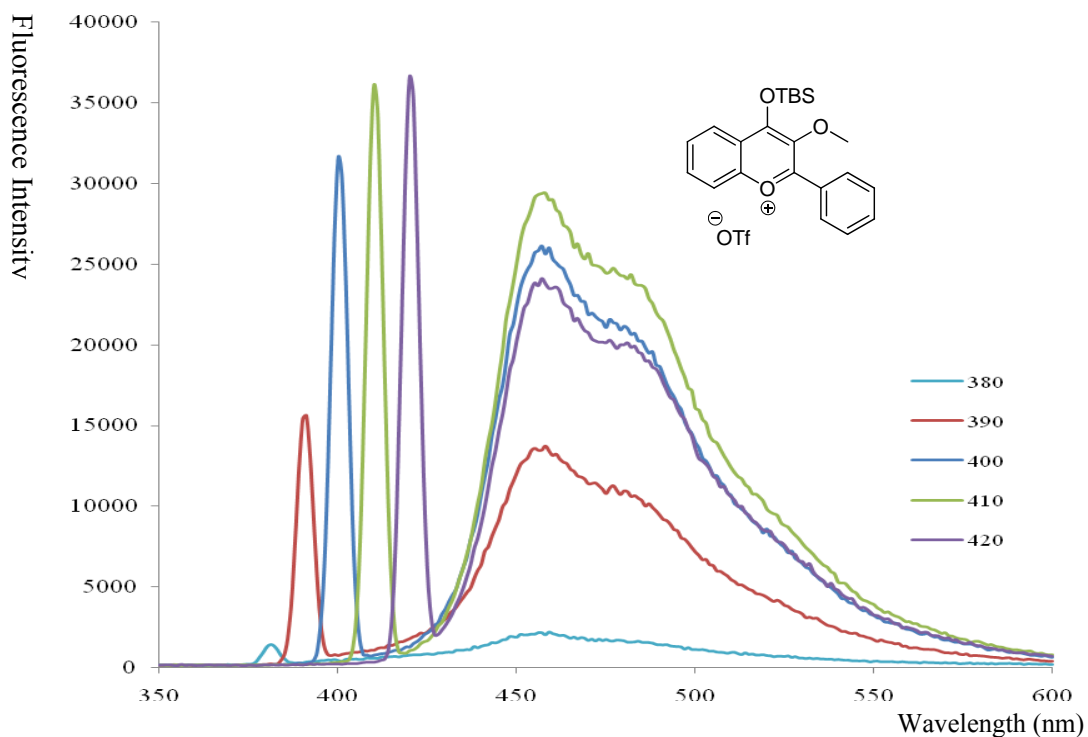

**Figure 1.** Fluorescence spectra of 4-(Tert-butyldimethylsilyloxy)-3-methoxy-2-phenylchromenylium triflate salt **51**, concentration of  $3.0 \times 10^{-4}$  M in CH<sub>2</sub>Cl<sub>2</sub>. (excitation wavelength stepwise scan)

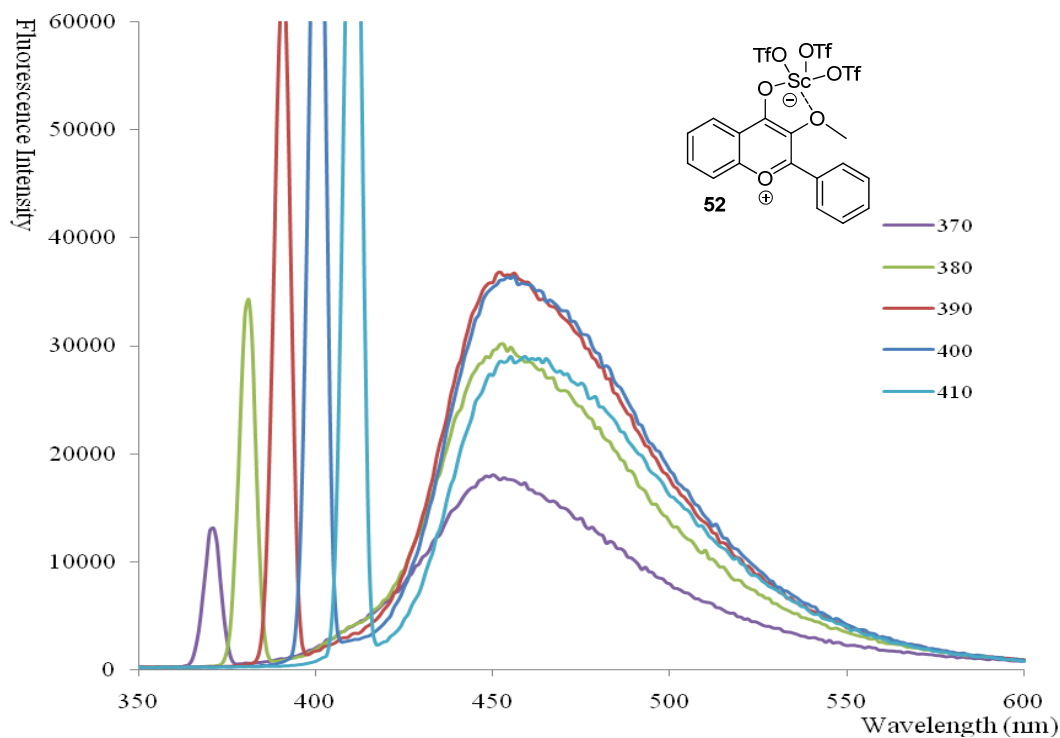

**Figure 2.** Fluorescence spectra of Sc(OTf)<sub>3</sub>/3-methoxyflavone complex **52**, concentration of  $3.0 \times 10^{-4}$  M in CH<sub>2</sub>Cl<sub>2</sub>. (excitation wavelength stepwise scan)

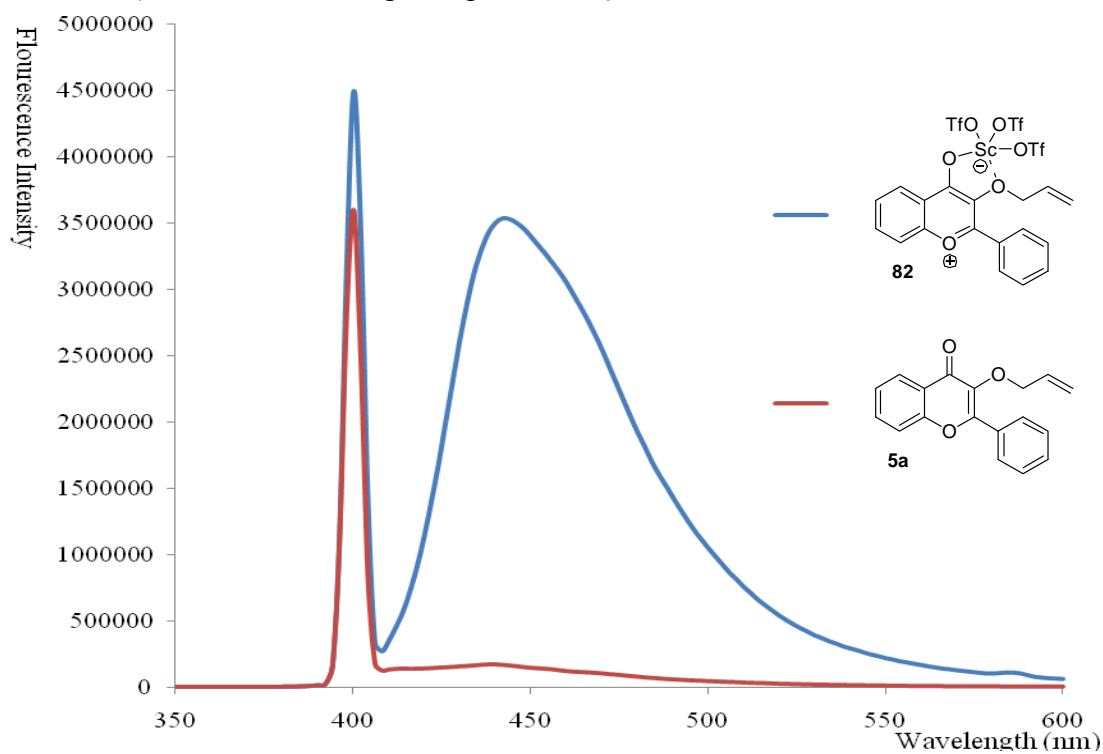

**Figure 3.** Overlay of fluorescence spectra of Sc(OTf)<sub>3</sub>/3-allyloxyflavone complex **82** and 3-allyloxyflavone **5a**, concentration of  $3.0 \times 10^{-4}$  M in CH<sub>2</sub>Cl<sub>2</sub>.

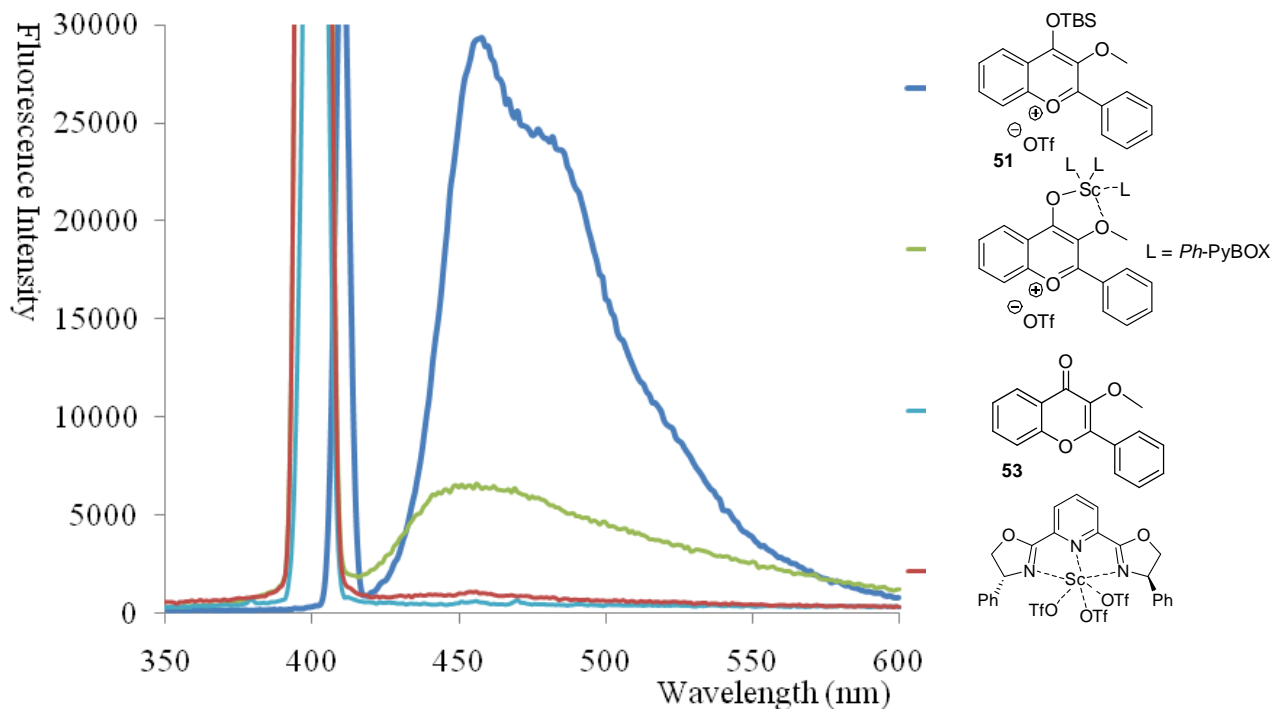

**Figure 4.** Overlay of fluorescence spectra of **51**, Sc(OTf)<sub>3</sub>-PyBox-3-methoxyflavone complex, **53** and Sc(OTf)<sub>3</sub>-PyBox complex, concentration of  $3.0 \times 10^{-4}$  M in CH<sub>2</sub>Cl<sub>2</sub>.

## IX. X-ray Crystal Structure Data.

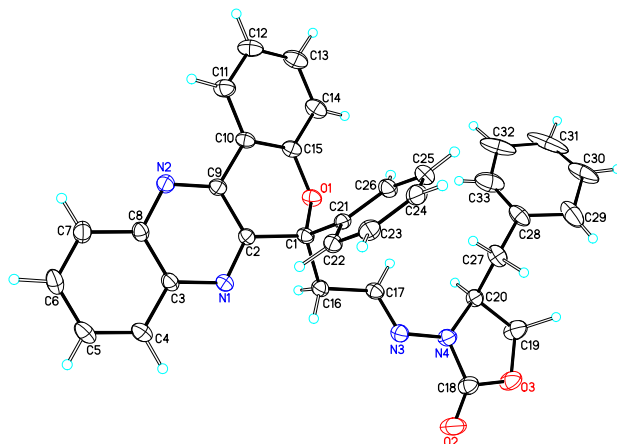

Crystals of compound **42** suitable for x-ray analysis were obtained by slow evaporation from  $\text{CDCl}_3$ . Crystallographic data have been deposited with the Cambridge Crystallographic Data Centre (CCDC 728510). Copies of the data can be obtained free of charge on application to the CCDC, 12 Union Road, Cambridge CB21EZ, UK (fax: (+44)-1223-336-033; e-mail: [deposit@ccdc.cam.ac.uk](mailto:deposit@ccdc.cam.ac.uk)).

Crystal Data and Structure Refinement for Pyrazine-hydrazone **42**.

|                                   |                                                               |          |
|-----------------------------------|---------------------------------------------------------------|----------|
| Identification code               | Pyrazine-hydrazone <b>42</b>                                  |          |
| Empirical formula                 | C <sub>33</sub> H <sub>26</sub> N <sub>4</sub> O <sub>3</sub> |          |
| Formula weight                    | 526.58                                                        |          |
| Temperature                       | 173(2) K                                                      |          |
| Wavelength                        | 0.71073 Å                                                     |          |
| Crystal system                    | Orthorhombic                                                  |          |
| Space group                       | P2(1)2(1)2(1)                                                 |          |
| Unit cell dimensions              | a = 10.009(4) Å                                               | α = 90°. |
|                                   | b = 15.153(6) Å                                               | β = 90°. |
|                                   | c = 17.540(6) Å                                               | γ = 90°. |
| Volume                            | 2660.2(17) Å <sup>3</sup>                                     |          |
| Z                                 | 4                                                             |          |
| Density (calculated)              | 1.315 Mg/m <sup>3</sup>                                       |          |
| Absorption coefficient            | 0.086 mm <sup>-1</sup>                                        |          |
| F(000)                            | 1104                                                          |          |
| Crystal size                      | 0.60 x 0.40 x 0.40 mm <sup>3</sup>                            |          |
| Theta range for data collection   | 1.78 to 31.50°.                                               |          |
| Index ranges                      | -14 ≤ h ≤ 10, -21 ≤ k ≤ 22, -25 ≤ l ≤ 25                      |          |
| Reflections collected             | 33418                                                         |          |
| Independent reflections           | 4912 [R(int) = 0.0386]                                        |          |
| Completeness to theta = 31.50°    | 100.0 %                                                       |          |
| Absorption correction             | Semi-empirical from equivalents                               |          |
| Max. and min. transmission        | 0.9664 and 0.9502                                             |          |
| Refinement method                 | Full-matrix least-squares on F <sup>2</sup>                   |          |
| Data / restraints / parameters    | 4912 / 0 / 481                                                |          |
| Goodness-of-fit on F <sup>2</sup> | 1.018                                                         |          |
| Final R indices [I > 2σ(I)]       | R1 = 0.0456, wR2 = 0.1160                                     |          |
| R indices (all data)              | R1 = 0.0567, wR2 = 0.1232                                     |          |
| Absolute structure parameter      | 2.2(12)                                                       |          |
| Largest diff. peak and hole       | 0.344 and -0.198 e.Å <sup>-3</sup>                            |          |



Atomic coordinates ( $\times 10^4$ ) and equivalent isotropic displacement parameters ( $\text{\AA}^2 \times 10^3$ ) for Pyrazine-hydrazone **42**.  $U(\text{eq})$  is defined as one third of the trace of the orthogonalized  $U^{ij}$  tensor.

|       | x        | y       | z        | U(eq) |
|-------|----------|---------|----------|-------|
| O(1)  | 8260(1)  | 975(1)  | 7113(1)  | 26(1) |
| O(2)  | 2103(1)  | 904(1)  | 8896(1)  | 49(1) |
| O(3)  | 3184(1)  | 829(1)  | 10012(1) | 42(1) |
| N(1)  | 6048(1)  | 1175(1) | 5541(1)  | 26(1) |
| N(2)  | 8554(1)  | 1301(1) | 4804(1)  | 27(1) |
| N(3)  | 4577(1)  | 1021(1) | 8201(1)  | 27(1) |
| N(4)  | 4396(1)  | 1006(1) | 8973(1)  | 30(1) |
| C(1)  | 7098(1)  | 1384(1) | 6778(1)  | 23(1) |
| C(2)  | 7158(1)  | 1284(1) | 5918(1)  | 21(1) |
| C(3)  | 6152(1)  | 1110(1) | 4767(1)  | 26(1) |
| C(4)  | 4992(2)  | 953(1)  | 4328(1)  | 38(1) |
| C(5)  | 5088(2)  | 871(1)  | 3557(1)  | 42(1) |
| C(6)  | 6328(2)  | 957(1)  | 3189(1)  | 39(1) |
| C(7)  | 7465(2)  | 1116(1) | 3596(1)  | 33(1) |
| C(8)  | 7404(1)  | 1186(1) | 4399(1)  | 25(1) |
| C(9)  | 8430(1)  | 1343(1) | 5554(1)  | 24(1) |
| C(10) | 9617(1)  | 1411(1) | 6037(1)  | 26(1) |
| C(11) | 10887(2) | 1606(1) | 5751(1)  | 33(1) |
| C(12) | 11984(2) | 1592(1) | 6229(1)  | 40(1) |
| C(13) | 11826(2) | 1379(1) | 6992(1)  | 39(1) |
| C(14) | 10580(2) | 1191(1) | 7289(1)  | 33(1) |
| C(15) | 9474(1)  | 1210(1) | 6808(1)  | 25(1) |
| C(16) | 5908(1)  | 867(1)  | 7094(1)  | 27(1) |
| C(17) | 5750(1)  | 921(1)  | 7938(1)  | 26(1) |
| C(18) | 3123(2)  | 917(1)  | 9245(1)  | 33(1) |
| C(19) | 4544(2)  | 782(2)  | 10261(1) | 45(1) |
| C(20) | 5420(2)  | 957(1)  | 9561(1)  | 26(1) |
| C(21) | 7043(1)  | 2357(1) | 7000(1)  | 22(1) |
| C(22) | 6271(1)  | 2944(1) | 6578(1)  | 26(1) |
| C(23) | 6213(2)  | 3827(1) | 6777(1)  | 31(1) |
| C(24) | 6899(2)  | 4135(1) | 7402(1)  | 33(1) |

|        |         |         |          |       |
|--------|---------|---------|----------|-------|
| C(25)  | 7644(2) | 3552(1) | 7834(1)  | 34(1) |
| C(26)  | 7726(2) | 2671(1) | 7634(1)  | 29(1) |
| C(27)  | 6230(2) | 1810(1) | 9635(1)  | 33(1) |
| C(28)  | 7347(2) | 1686(1) | 10190(1) | 35(1) |
| C(29)  | 7210(3) | 2012(2) | 10933(1) | 57(1) |
| C(30)  | 8455(6) | 1766(4) | 11407(3) | 63(2) |
| C(31)  | 9552(6) | 1302(4) | 11118(4) | 83(2) |
| C(32)  | 9580(5) | 1053(4) | 10344(4) | 64(2) |
| C(30') | 8009(5) | 1973(3) | 11494(3) | 50(1) |
| C(31') | 9195(5) | 1517(3) | 11346(3) | 50(1) |
| C(32') | 9438(5) | 1137(4) | 10663(3) | 52(1) |
| C(33)  | 8484(2) | 1237(1) | 9996(2)  | 55(1) |

---

## X. Circular Dichroism (CD) Data and Calculations.

The conformational distribution of **7b** and **25** was calculated using MMFF94 systematic conformational searches using the Spartan02 program. For (*S*)-**7b**, two starting geometries that differ in the orientation of dihydropyrazine ring were submitted to MMFF94 search. The lower energy conformers differing from the most stable one by less than 10 kcal/mol were further fully optimized at the DFT/B3LYP/6-31G(d,p) level as implemented in Gaussian03 software. Conformers within 1.5 kcal/mol from the most stable one were taken into account for CD calculations since contributions from conformers with more than 1.5 kcal/mol were found to be significantly smaller. The energies of conformers of (*S*)-**7b** that differ in the orientation of dihydropyrazine ring were all higher than 1.5 kcal/mol. CD spectra were calculated using Gaussian03 software by means of the TDDFT approach, the B3LYP functional, and the 6-31G(d) or aug-cc-pVDZ basis sets. The calculated CD spectra in  $\Delta\epsilon$  units were obtained based on velocity-representation rotational strengths by using Gaussian band shapes and 0.15 eV half-width at 1/e of peak height.

**Figure 5.** The three conformers of (*S*)-**25** taken into account for the CD calculation

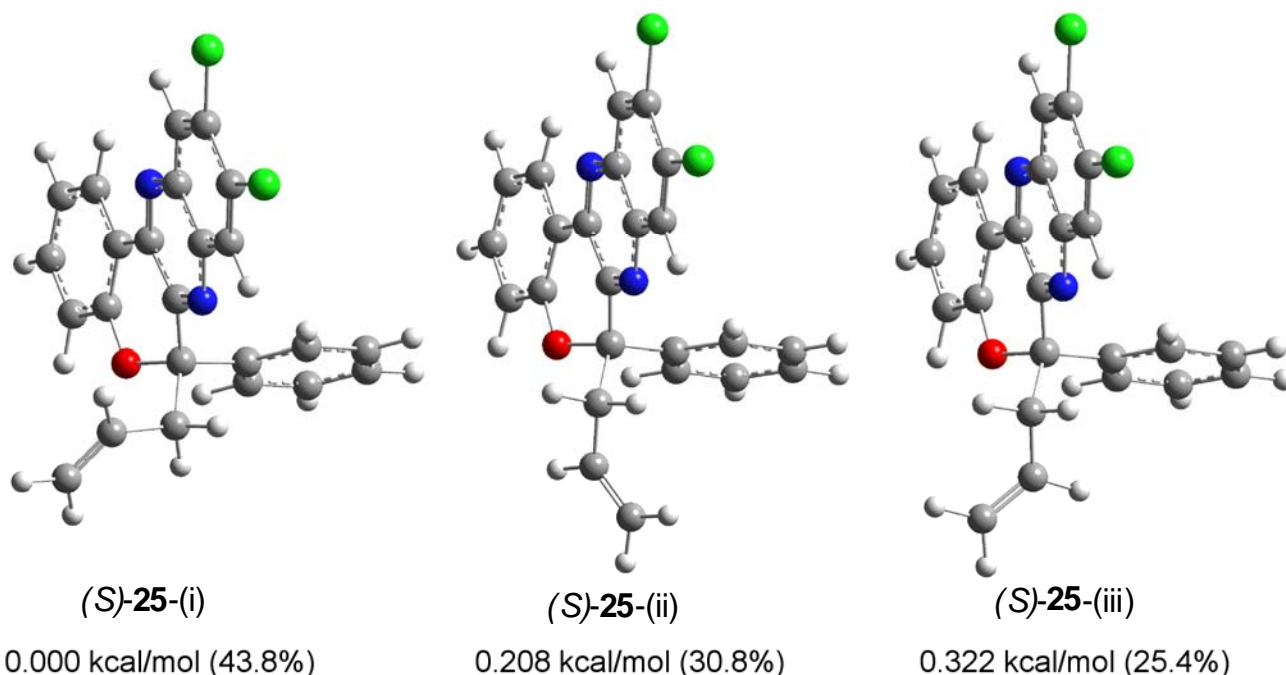

The stable conformers of (*S*)-**25** within 1.5 kcal/mol from the most stable were optimized using DFT/B3LYP/6-31G(d,p) level of theory. These conformers mainly differ in the direction of the propenyl group. Their relative energy  $\Delta E$  and Boltzmann population at 298.15K are shown under each structure. The fourth most stable conformer (not shown), whose relative energy is 1.561 kcal/mol, was not considered in the CD calculation.

**Figure 6.** The five conformers of (*S*)-**7b** taken into account for the CD calculation

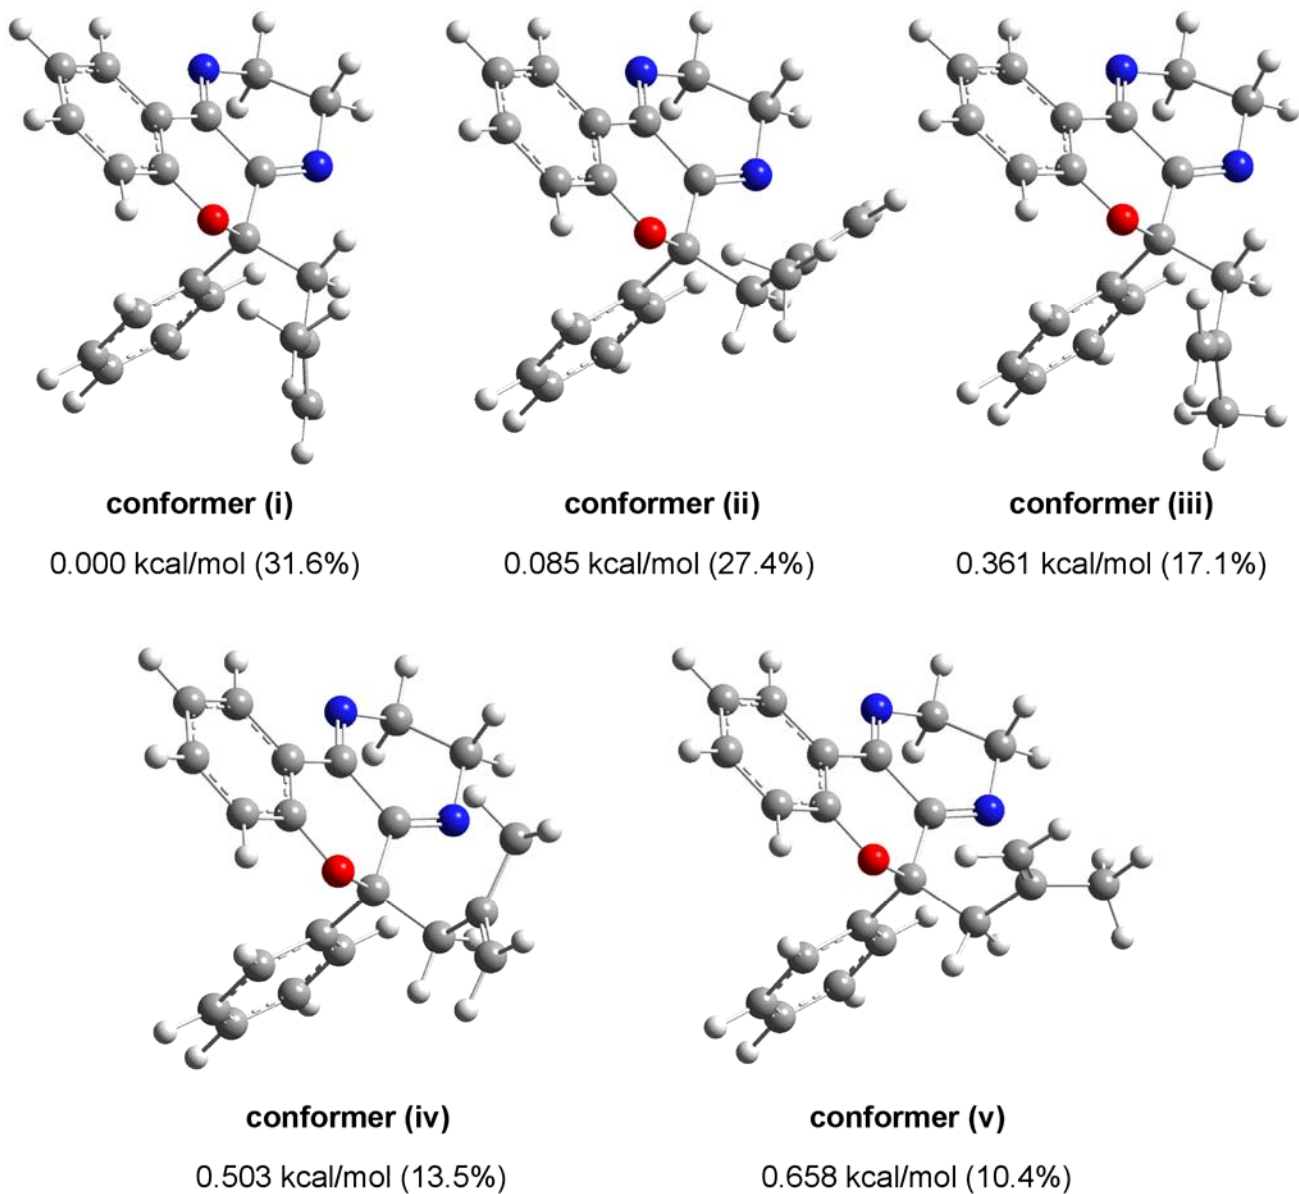

The stable conformers of (*S*)-**7b** within 1.5 kcal/mol from the most stable one after optimization using DFT/B3LYP/6-31G(d,p) level of theory. Their relative energy  $\Delta E$  and Boltzmann population at 298.15K are shown under each structure.

**Figure 7.** Comparison of the calculated CD spectra and the observed spectrum of **7b**.

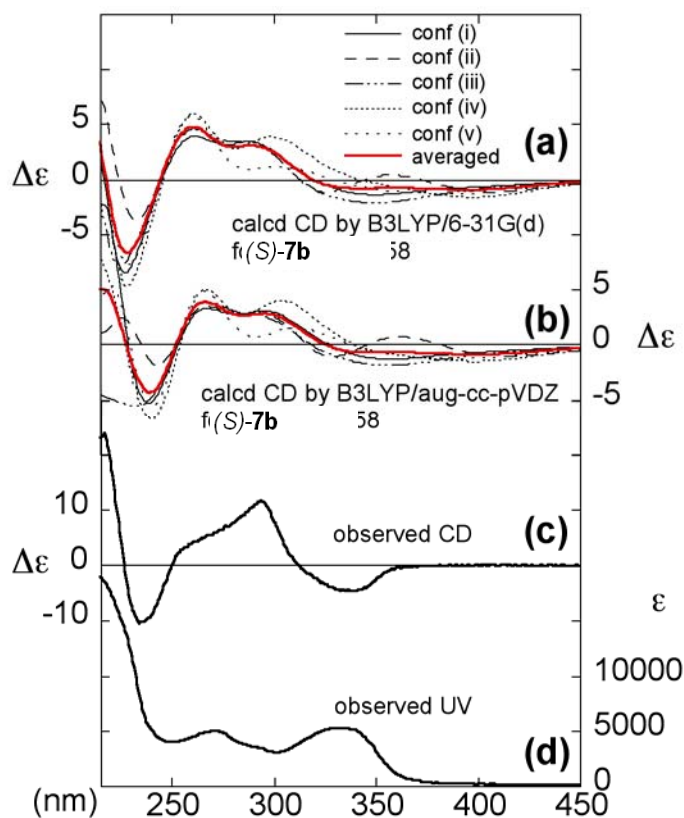

(a) Calculated CD spectra at the TDDFT/B3LYP/6-31G(d) for (*S*)-**7b**. The averaged spectrum is a Boltzmann population weighted-average of the five conformers' spectra. (b) Calculated CD spectra at the TDDFT/B3LYP/aug-cc-pVDZ for (*S*)-**7b**. (c) The observed CD and (d) UV spectrum obtained as an acetonitrile solution (0.50 mM). The observed CD spectrum showed a good agreement with the calculated spectra: a negative band in the longer wavelength region, a positive peak at 294 nm, a positive shoulder at around 260 nm, and a negative sharp peak at 234 nm. The observed CD spectrum is normalized to 100 % ee. UV  $\lambda_{\text{max}}$  ( $\epsilon$ ): 218 (18200), 271 (5000), 334 (5300); CD  $\lambda_{\text{ext}}$  ( $\Delta\epsilon$ ): 217 (+24.0), 234 (-10.6), 294 (+11.6), 333 (-4.7).

## Optimized Cartesian Coordinates

(S)-25-(i)

B3LYP/6-31G(d,p) optimized geometry [E = -2029.32410499 hartrees]

Cartesian coordinates (Angstroms)

| Center<br>Number | Atomic<br>Number | Coordinates (Angstroms) |           |           |
|------------------|------------------|-------------------------|-----------|-----------|
|                  |                  | X                       | Y         | Z         |
| 1                | 1                | -0.794277               | -3.625645 | 1.140359  |
| 2                | 6                | -1.699721               | -3.235119 | 0.689043  |
| 3                | 6                | -3.988725               | -2.183786 | -0.528169 |
| 4                | 6                | -1.652698               | -1.953391 | 0.115729  |
| 5                | 6                | -2.87087                | -3.979348 | 0.66111   |
| 6                | 6                | -4.012903               | -3.452052 | 0.042345  |
| 7                | 6                | -2.812759               | -1.429034 | -0.480902 |
| 8                | 1                | -2.900067               | -4.967051 | 1.109503  |
| 9                | 1                | -4.929816               | -4.033126 | 0.009924  |
| 10               | 1                | -4.861629               | -1.761226 | -1.014158 |
| 11               | 6                | -0.423323               | -1.168111 | 0.036432  |
| 12               | 7                | 0.55357                 | 0.934733  | -0.619682 |
| 13               | 7                | 0.737109                | -1.712612 | 0.359733  |
| 14               | 6                | -0.510868               | 0.18921   | -0.440368 |
| 15               | 8                | -2.828801               | -0.2068   | -1.088172 |
| 16               | 6                | -1.889756               | 0.807756  | -0.665011 |
| 17               | 6                | -2.392262               | 1.471878  | 0.634637  |
| 18               | 6                | -3.343916               | 2.78185   | 2.932654  |
| 19               | 6                | -3.726833               | 1.33045   | 1.03344   |
| 20               | 6                | -1.542207               | 2.286558  | 1.394934  |
| 21               | 6                | -2.015724               | 2.936817  | 2.534372  |
| 22               | 6                | -4.196952               | 1.978487  | 2.176451  |
| 23               | 1                | -4.398276               | 0.714903  | 0.447242  |
| 24               | 1                | -0.507856               | 2.416357  | 1.094356  |

|       |       |           |           |           |
|-------|-------|-----------|-----------|-----------|
| 25    | 1     | -1.342271 | 3.563062  | 3.112282  |
| 26    | 1     | -5.234023 | 1.853016  | 2.474067  |
| 27    | 1     | -3.710536 | 3.284043  | 3.823004  |
| 28    | 6     | -1.894458 | 1.851523  | -1.810381 |
| 29    | 1     | -1.223512 | 2.660086  | -1.503489 |
| 30    | 1     | -2.907677 | 2.261795  | -1.86205  |
| 31    | 6     | -1.478507 | 1.315956  | -3.152852 |
| 32    | 6     | -2.276423 | 1.254781  | -4.217931 |
| 33    | 1     | -1.924158 | 0.877838  | -5.173463 |
| 34    | 1     | -3.312328 | 1.582349  | -4.174824 |
| 35    | 1     | -0.446359 | 0.980589  | -3.237027 |
| 36    | 6     | 1.763922  | 0.382487  | -0.306062 |
| 37    | 6     | 1.848428  | -0.944007 | 0.207018  |
| 38    | 6     | 2.941864  | 1.141388  | -0.479626 |
| 39    | 1     | 2.862641  | 2.147815  | -0.873426 |
| 40    | 6     | 3.115963  | -1.473506 | 0.546619  |
| 41    | 1     | 3.170882  | -2.482304 | 0.937735  |
| 42    | 6     | 4.254803  | -0.717145 | 0.374961  |
| 43    | 6     | 4.168284  | 0.606076  | -0.147208 |
| 44    | 17    | 5.603754  | 1.572746  | -0.373559 |
| 45    | 17    | 5.800291  | -1.40635  | 0.803416  |
| ----- | ----- | -----     | -----     | -----     |

(S)-25-(ii)

B3LYP/6-31G(d,p) optimized geometry [E = -2029.32377347 hartrees]

Cartesian coordinates (Angstroms)

| Center<br>Number | Atomic<br>Number | Coordinates (Angstroms) |           |           |
|------------------|------------------|-------------------------|-----------|-----------|
| -----            | -----            | X                       | Y         | Z         |
| -----            | -----            | -----                   | -----     | -----     |
| 1                | 1                | 0.45048                 | -3.838253 | -0.81574  |
| 2                | 6                | 1.378228                | -3.484539 | -0.379611 |

|    |   |           |           |           |
|----|---|-----------|-----------|-----------|
| 3  | 6 | 3.728254  | -2.523001 | 0.795462  |
| 4  | 6 | 1.415767  | -2.172616 | 0.120685  |
| 5  | 6 | 2.496584  | -4.303142 | -0.300483 |
| 6  | 6 | 3.668892  | -3.820573 | 0.297144  |
| 7  | 6 | 2.606308  | -1.695432 | 0.695262  |
| 8  | 1 | 2.46075   | -5.314153 | -0.692969 |
| 9  | 1 | 4.544185  | -4.459344 | 0.36918   |
| 10 | 1 | 4.626341  | -2.133189 | 1.262757  |
| 11 | 6 | 0.242192  | -1.302101 | 0.148322  |
| 12 | 7 | -0.590658 | 0.897807  | 0.668365  |
| 13 | 7 | -0.952514 | -1.787927 | -0.140666 |
| 14 | 6 | 0.42141   | 0.074035  | 0.538072  |
| 15 | 8 | 2.699332  | -0.4425   | 1.233001  |
| 16 | 6 | 1.840089  | 0.611355  | 0.733866  |
| 17 | 6 | 2.384832  | 1.154507  | -0.601    |
| 18 | 6 | 3.388552  | 2.236139  | -2.993706 |
| 19 | 6 | 1.612016  | 2.041712  | -1.363153 |
| 20 | 6 | 3.668807  | 0.823783  | -1.047319 |
| 21 | 6 | 4.164245  | 1.358488  | -2.237742 |
| 22 | 6 | 2.111194  | 2.57953   | -2.548622 |
| 23 | 1 | 0.616116  | 2.312722  | -1.027937 |
| 24 | 1 | 4.284977  | 0.151757  | -0.463226 |
| 25 | 1 | 5.161856  | 1.087281  | -2.570988 |
| 26 | 1 | 1.497767  | 3.265031  | -3.126177 |
| 27 | 1 | 3.775389  | 2.650632  | -3.919958 |
| 28 | 6 | 1.872226  | 1.695504  | 1.841024  |
| 29 | 1 | 1.44074   | 1.237545  | 2.740727  |
| 30 | 1 | 1.204212  | 2.505016  | 1.540798  |
| 31 | 6 | 3.247558  | 2.220291  | 2.145842  |
| 32 | 6 | 3.593022  | 3.505629  | 2.083272  |
| 33 | 1 | 4.59489   | 3.839187  | 2.336678  |
| 34 | 1 | 2.886961  | 4.273827  | 1.777232  |
| 35 | 1 | 3.982723  | 1.47992   | 2.454616  |
| 36 | 6 | -1.83556  | 0.408808  | 0.388579  |



|       |       |           |           |           |
|-------|-------|-----------|-----------|-----------|
| 37    | 6     | -2.010169 | -0.939213 | -0.038397 |
| 38    | 6     | -2.959625 | 1.254555  | 0.510147  |
| 39    | 1     | -2.812329 | 2.276424  | 0.839038  |
| 40    | 6     | -3.310987 | -1.403519 | -0.345863 |
| 41    | 1     | -3.434448 | -2.429309 | -0.671827 |
| 42    | 6     | -4.396078 | -0.562792 | -0.226027 |
| 43    | 6     | -4.219768 | 0.782607  | 0.209858  |
| 44    | 17    | -5.586549 | 1.856232  | 0.369753  |
| 45    | 17    | -5.985274 | -1.17237  | -0.613504 |
| ----- | ----- | -----     | -----     | -----     |

(S)-25-(iii)

B3LYP/6-31G(d,p) optimized geometry [E = -2029.32359229 hartrees]

Cartesian coordinates (Angstroms)

| Center<br>Number | Atomic<br>Number | Coordinates (Angstroms) |           |           |
|------------------|------------------|-------------------------|-----------|-----------|
| -----            | -----            | X                       | Y         | Z         |
| -----            | -----            | -----                   | -----     | -----     |
| 1                | 1                | 0.488001                | -3.789636 | -0.864332 |
| 2                | 6                | 1.418417                | -3.41899  | -0.448379 |
| 3                | 6                | 3.775711                | -2.41435  | 0.675825  |
| 4                | 6                | 1.443749                | -2.105571 | 0.049289  |
| 5                | 6                | 2.5523                  | -4.21758  | -0.391924 |
| 6                | 6                | 3.728394                | -3.71333  | 0.180499  |
| 7                | 6                | 2.637509                | -1.606131 | 0.597932  |
| 8                | 1                | 2.526042                | -5.229742 | -0.782228 |
| 9                | 1                | 4.615919                | -4.336822 | 0.235152  |
| 10               | 1                | 4.675387                | -2.00728  | 1.124879  |
| 11               | 6                | 0.256686                | -1.255382 | 0.10052   |
| 12               | 7                | -0.602802               | 0.931854  | 0.630349  |
| 13               | 7                | -0.935333               | -1.761161 | -0.165006 |
| 14               | 6                | 0.420378                | 0.124344  | 0.485519  |

|       |       |           |           |           |
|-------|-------|-----------|-----------|-----------|
| 15    | 8     | 2.722595  | -0.352204 | 1.131939  |
| 16    | 6     | 1.833814  | 0.684935  | 0.658292  |
| 17    | 6     | 2.341757  | 1.245022  | -0.686124 |
| 18    | 6     | 3.284465  | 2.354098  | -3.091756 |
| 19    | 6     | 3.624244  | 0.939292  | -1.156283 |
| 20    | 6     | 1.539955  | 2.121683  | -1.431184 |
| 21    | 6     | 2.008884  | 2.672357  | -2.623306 |
| 22    | 6     | 4.089323  | 1.488051  | -2.352784 |
| 23    | 1     | 4.26177   | 0.277634  | -0.58341  |
| 24    | 1     | 0.545251  | 2.373066  | -1.077732 |
| 25    | 1     | 1.373271  | 3.348723  | -3.187422 |
| 26    | 1     | 5.085738  | 1.23634   | -2.70435  |
| 27    | 1     | 3.647428  | 2.77916   | -4.022832 |
| 28    | 6     | 1.862189  | 1.764281  | 1.770521  |
| 29    | 1     | 1.482234  | 1.304502  | 2.688736  |
| 30    | 1     | 1.144286  | 2.537048  | 1.477566  |
| 31    | 6     | 3.21563   | 2.369673  | 2.015664  |
| 32    | 6     | 3.860637  | 2.318179  | 3.18041   |
| 33    | 1     | 4.826207  | 2.795461  | 3.318448  |
| 34    | 1     | 3.445642  | 1.799019  | 4.040912  |
| 35    | 1     | 3.668098  | 2.896838  | 1.177502  |
| 36    | 6     | -1.844619 | 0.422105  | 0.374962  |
| 37    | 6     | -2.004865 | -0.930135 | -0.044058 |
| 38    | 6     | -2.97991  | 1.249783  | 0.514884  |
| 39    | 1     | -2.843448 | 2.275178  | 0.837508  |
| 40    | 6     | -3.303487 | -1.417084 | -0.324594 |
| 41    | 1     | -3.416094 | -2.44598  | -0.644607 |
| 42    | 6     | -4.399929 | -0.594038 | -0.186588 |
| 43    | 6     | -4.237644 | 0.7558    | 0.240841  |
| 44    | 17    | -5.618815 | 1.807193  | 0.423504  |
| 45    | 17    | -5.985955 | -1.231476 | -0.540904 |
| ----- | ----- | -----     | -----     | -----     |

(S)-7b-(i)

B3LYP/6-31G(d,p) optimized geometry [E = -996.99313848 hartrees]

Cartesian coordinates (Angstroms)

| Center<br>Number | Atomic<br>Number | Coordinates (Angstroms) |           |           |
|------------------|------------------|-------------------------|-----------|-----------|
|                  |                  | X                       | Y         | Z         |
| 1                | 1                | 4.067204                | 0.087703  | -0.944673 |
| 2                | 6                | 3.381247                | 0.86169   | -0.61761  |
| 3                | 6                | 1.570802                | 2.795474  | 0.269898  |
| 4                | 6                | 2.152795                | 0.456182  | -0.068635 |
| 5                | 6                | 3.704095                | 2.206743  | -0.721284 |
| 6                | 6                | 2.795758                | 3.173523  | -0.266903 |
| 7                | 6                | 1.244724                | 1.437002  | 0.363033  |
| 8                | 1                | 4.656283                | 2.508856  | -1.145379 |
| 9                | 1                | 3.043537                | 4.22858   | -0.338303 |
| 10               | 1                | 0.853837                | 3.530222  | 0.620853  |
| 11               | 6                | 1.811961                | -0.959482 | 0.117566  |
| 12               | 7                | 0.219071                | -2.366779 | 1.309968  |
| 13               | 6                | 2.158587                | -3.260447 | 0.033495  |
| 14               | 6                | 1.304006                | -3.356369 | 1.293602  |
| 15               | 7                | 2.621778                | -1.897207 | -0.225263 |
| 16               | 6                | 0.48434                 | -1.24931  | 0.751454  |
| 17               | 1                | 1.583741                | -3.599717 | -0.842769 |
| 18               | 1                | 1.922968                | -3.187188 | 2.187396  |
| 19               | 1                | 3.031212                | -3.917577 | 0.107334  |
| 20               | 1                | 0.865025                | -4.353622 | 1.397396  |
| 21               | 8                | 0.033101                | 1.133634  | 0.920066  |
| 22               | 6                | -0.581269               | -0.153857 | 0.657     |
| 23               | 6                | -1.199372               | -0.171384 | -0.752025 |
| 24               | 6                | -2.41666                | -0.237379 | -3.284626 |
| 25               | 6                | -1.634399               | -1.384291 | -1.304317 |
| 26               | 6                | -1.387635               | 1.007611  | -1.480777 |

|       |       |           |           |           |
|-------|-------|-----------|-----------|-----------|
| 27    | 6     | -1.988746 | 0.972804  | -2.739744 |
| 28    | 6     | -2.240962 | -1.416644 | -2.559545 |
| 29    | 1     | -1.497939 | -2.30653  | -0.748153 |
| 30    | 1     | -1.066903 | 1.953925  | -1.062971 |
| 31    | 1     | -2.123918 | 1.897427  | -3.293506 |
| 32    | 1     | -2.571669 | -2.365627 | -2.97182  |
| 33    | 1     | -2.883072 | -0.262036 | -4.265093 |
| 34    | 6     | -1.656915 | -0.339584 | 1.759316  |
| 35    | 1     | -1.125872 | -0.34296  | 2.718178  |
| 36    | 1     | -2.063549 | -1.343214 | 1.626231  |
| 37    | 6     | -2.779564 | 0.679758  | 1.789978  |
| 38    | 6     | -3.975831 | 0.395097  | 1.264585  |
| 39    | 1     | -4.794431 | 1.109013  | 1.295129  |
| 40    | 1     | -4.176036 | -0.555069 | 0.778269  |
| 41    | 6     | -2.510147 | 1.993433  | 2.482059  |
| 42    | 1     | -1.697037 | 2.538502  | 1.993784  |
| 43    | 1     | -3.401195 | 2.627116  | 2.495375  |
| 44    | 1     | -2.193817 | 1.827616  | 3.520142  |
| ----- | ----- | -----     | -----     | -----     |

(S)-7b-(ii)

B3LYP/6-31G(d,p) optimized geometry [E = -996.99300345 hartrees]

Cartesian coordinates (Angstroms)

| Center<br>Number | Atomic<br>Number | Coordinates (Angstroms) |           |           |
|------------------|------------------|-------------------------|-----------|-----------|
|                  |                  | X                       | Y         | Z         |
| -----            | -----            | -----                   | -----     | -----     |
| 1                | 1                | -3.406609               | -0.522527 | -2.088717 |
| 2                | 6                | -3.190996               | -0.668746 | -1.03582  |
| 3                | 6                | -2.567139               | -0.994638 | 1.667114  |
| 4                | 6                | -1.948198               | -0.22019  | -0.55632  |
| 5                | 6                | -4.108982               | -1.265393 | -0.184374 |

|    |   |           |           |           |
|----|---|-----------|-----------|-----------|
| 6  | 6 | -3.794112 | -1.420716 | 1.17337   |
| 7  | 6 | -1.6407   | -0.39922  | 0.80181   |
| 8  | 1 | -5.066701 | -1.605264 | -0.565221 |
| 9  | 1 | -4.509156 | -1.882175 | 1.848216  |
| 10 | 1 | -2.303588 | -1.111777 | 2.713056  |
| 11 | 6 | -0.979725 | 0.460594  | -1.424042 |
| 12 | 7 | 1.047831  | 1.808447  | -1.316617 |
| 13 | 6 | -0.163328 | 1.314598  | -3.433942 |
| 14 | 6 | 0.586624  | 2.348814  | -2.601269 |
| 15 | 7 | -1.212005 | 0.633399  | -2.676637 |
| 16 | 6 | 0.286523  | 0.93677   | -0.776258 |
| 17 | 1 | 0.533633  | 0.54918   | -3.810645 |
| 18 | 1 | -0.064899 | 3.208001  | -2.383104 |
| 19 | 1 | -0.616002 | 1.782357  | -4.314476 |
| 20 | 1 | 1.452877  | 2.738679  | -3.145015 |
| 21 | 8 | -0.464891 | 0.01475   | 1.360977  |
| 22 | 6 | 0.697124  | 0.263609  | 0.533646  |
| 23 | 6 | 1.398913  | -1.073377 | 0.215648  |
| 24 | 6 | 2.778284  | -3.471024 | -0.284018 |
| 25 | 6 | 2.415456  | -1.124382 | -0.748133 |
| 26 | 6 | 1.087116  | -2.235494 | 0.93086   |
| 27 | 6 | 1.770191  | -3.426075 | 0.678801  |
| 28 | 6 | 3.101112  | -2.313786 | -0.993731 |
| 29 | 1 | 2.670205  | -0.229075 | -1.306013 |
| 30 | 1 | 0.311043  | -2.207376 | 1.68617   |
| 31 | 1 | 1.511624  | -4.320039 | 1.239077  |
| 32 | 1 | 3.886137  | -2.335064 | -1.74418  |
| 33 | 1 | 3.307939  | -4.398757 | -0.479435 |
| 34 | 6 | 1.641948  | 1.142212  | 1.398875  |
| 35 | 1 | 2.486686  | 1.40654   | 0.760674  |
| 36 | 1 | 2.022135  | 0.49099   | 2.194063  |
| 37 | 6 | 1.041675  | 2.395618  | 2.016891  |
| 38 | 6 | 1.183102  | 3.592206  | 1.437023  |
| 39 | 1 | 0.779755  | 4.491648  | 1.895043  |

|       |       |           |          |          |
|-------|-------|-----------|----------|----------|
| 40    | 1     | 1.69492   | 3.704978 | 0.48741  |
| 41    | 6     | 0.347895  | 2.236955 | 3.348012 |
| 42    | 1     | 1.034453  | 1.818388 | 4.096081 |
| 43    | 1     | -0.01784  | 3.19643  | 3.72404  |
| 44    | 1     | -0.494969 | 1.543918 | 3.273083 |
| ----- | ----- | -----     | -----    | -----    |

(S)-7b-(iii)

B3LYP/6-31G(d,p) optimized geometry [E = -996.99256304 hartrees]

Cartesian coordinates (Angstroms)

| Center<br>Number | Atomic<br>Number | Coordinates (Angstroms) |           |           |
|------------------|------------------|-------------------------|-----------|-----------|
| -----            | -----            | X                       | Y         | Z         |
| -----            | -----            | -----                   | -----     | -----     |
| 1                | 1                | 4.068223                | 0.1601    | -0.992166 |
| 2                | 6                | 3.393139                | 0.906594  | -0.587652 |
| 3                | 6                | 1.611393                | 2.767595  | 0.495211  |
| 4                | 6                | 2.176813                | 0.46118   | -0.042443 |
| 5                | 6                | 3.717991                | 2.255203  | -0.591679 |
| 6                | 6                | 2.824421                | 3.18456   | -0.039579 |
| 7                | 6                | 1.282813                | 1.40662   | 0.48742   |
| 8                | 1                | 4.66048                 | 2.588679  | -1.014007 |
| 9                | 1                | 3.074636                | 4.241489  | -0.033366 |
| 10               | 1                | 0.904172                | 3.471091  | 0.921686  |
| 11               | 6                | 1.833624                | -0.963741 | 0.039998  |
| 12               | 7                | 0.250163                | -2.455548 | 1.140994  |
| 13               | 6                | 2.166536                | -3.252886 | -0.230828 |
| 14               | 6                | 1.329903                | -3.444805 | 1.03046   |
| 15               | 7                | 2.632159                | -1.875265 | -0.389647 |
| 16               | 6                | 0.514305                | -1.297801 | 0.671182  |
| 17               | 1                | 1.577498                | -3.520672 | -1.122403 |
| 18               | 1                | 1.962903                | -3.348537 | 1.925236  |

|       |       |           |           |           |
|-------|-------|-----------|-----------|-----------|
| 19    | 1     | 3.037144  | -3.916805 | -0.222114 |
| 20    | 1     | 0.887963  | -4.445642 | 1.062147  |
| 21    | 8     | 0.085643  | 1.062145  | 1.048847  |
| 22    | 6     | -0.543168 | -0.191356 | 0.683165  |
| 23    | 6     | -1.178795 | -0.074233 | -0.713146 |
| 24    | 6     | -2.453343 | 0.120611  | -3.210574 |
| 25    | 6     | -1.435674 | 1.177798  | -1.283906 |
| 26    | 6     | -1.571691 | -1.227834 | -1.406193 |
| 27    | 6     | -2.205843 | -1.130857 | -2.644796 |
| 28    | 6     | -2.066933 | 1.272424  | -2.524875 |
| 29    | 1     | -1.150521 | 2.075906  | -0.750402 |
| 30    | 1     | -1.387049 | -2.204731 | -0.97068  |
| 31    | 1     | -2.503687 | -2.03507  | -3.167791 |
| 32    | 1     | -2.258051 | 2.251602  | -2.954475 |
| 33    | 1     | -2.942989 | 0.197077  | -4.176924 |
| 34    | 6     | -1.597604 | -0.444066 | 1.791849  |
| 35    | 1     | -1.049096 | -0.449651 | 2.738422  |
| 36    | 1     | -1.977129 | -1.458119 | 1.645603  |
| 37    | 6     | -2.740759 | 0.554379  | 1.855098  |
| 38    | 6     | -2.618605 | 1.704744  | 2.525211  |
| 39    | 1     | -3.439055 | 2.414639  | 2.586828  |
| 40    | 1     | -1.6954   | 1.975651  | 3.027406  |
| 41    | 6     | -4.028314 | 0.161948  | 1.172925  |
| 42    | 1     | -4.791218 | 0.938028  | 1.279691  |
| 43    | 1     | -3.875644 | -0.025271 | 0.104608  |
| 44    | 1     | -4.425821 | -0.767703 | 1.601403  |
| ----- | ----- | -----     | -----     | -----     |

(S)-**7b**-(iv)

B3LYP/6-31G(d,p) optimized geometry [E = -996.99233700 hartrees]

Cartesian coordinates (Angstroms)

-----

| Center<br>Number | Atomic<br>Number | Coordinates (Angstroms) |           |           |
|------------------|------------------|-------------------------|-----------|-----------|
|                  |                  | X                       | Y         | Z         |
| 1                | 1                | 3.408017                | 1.183989  | -1.753494 |
| 2                | 6                | 3.10482                 | 1.188968  | -0.712072 |
| 3                | 6                | 2.265885                | 1.14198   | 1.952553  |
| 4                | 6                | 1.912061                | 0.524958  | -0.376432 |
| 5                | 6                | 3.868133                | 1.815623  | 0.261631  |
| 6                | 6                | 3.446901                | 1.782801  | 1.599187  |
| 7                | 6                | 1.493354                | 0.518571  | 0.964569  |
| 8                | 1                | 4.788478                | 2.323252  | -0.008699 |
| 9                | 1                | 4.042481                | 2.265374  | 2.36866   |
| 10               | 1                | 1.921022                | 1.106962  | 2.980514  |
| 11               | 6                | 1.114886                | -0.195249 | -1.376811 |
| 12               | 7                | -0.684774               | -1.832618 | -1.540629 |
| 13               | 7                | 0.569793                | -0.966404 | -3.50786  |
| 14               | 6                | -0.062953               | -2.175139 | -2.825756 |
| 15               | 8                | 1.45317                 | -0.215164 | -2.617093 |
| 16               | 6                | -0.105298               | -0.909292 | -0.8743   |
| 17               | 6                | -0.212262               | -0.280198 | -3.869449 |
| 18               | 6                | 0.69941                 | -2.94429  | -2.630829 |
| 19               | 6                | 1.142534                | -1.276298 | -4.388113 |
| 20               | 6                | -0.821048               | -2.636774 | -3.466155 |
| 21               | 6                | 0.356538                | -0.108381 | 1.388394  |
| 22               | 6                | -0.697443               | -0.419349 | 0.448386  |
| 23               | 1                | -1.540584               | 0.842655  | 0.169495  |
| 24               | 1                | -3.176083               | 3.084562  | -0.275379 |
| 25               | 1                | -1.439786               | 1.970391  | 0.992591  |
| 26               | 1                | -2.476807               | 0.847083  | -0.873607 |
| 27               | 1                | -3.289887               | 1.959191  | -1.092135 |
| 28               | 6                | -2.249344               | 3.084387  | 0.767217  |
| 29               | 1                | -0.730293               | 1.97483   | 1.811093  |
| 30               | 1                | -2.569094               | -0.023264 | -1.515149 |
| 31               | 6                | -4.010161               | 1.94548   | -1.905103 |



|       |       |           |           |           |
|-------|-------|-----------|-----------|-----------|
| 32    | 6     | -2.154157 | 3.953656  | 1.411588  |
| 33    | 1     | -3.804447 | 3.953075  | -0.449288 |
| 34    | 1     | -1.581985 | -1.477271 | 1.162492  |
| 35    | 1     | -2.209721 | -1.926228 | 0.385202  |
| 36    | 6     | -2.239798 | -0.94011  | 1.85006   |
| 37    | 6     | -0.852708 | -2.560977 | 1.933525  |
| 38    | 6     | -1.111817 | -2.740907 | 3.232793  |
| 39    | 1     | -0.639264 | -3.536805 | 3.801749  |
| 40    | 6     | -1.805086 | -2.102089 | 3.772678  |
| 41    | 1     | 0.116054  | -3.451042 | 1.197089  |
| 42    | 6     | -0.346702 | -3.892546 | 0.307833  |
| 43    | 6     | 0.987397  | -2.884716 | 0.84737   |
| 44    | 17    | 0.478467  | -4.255015 | 1.843381  |
| ----- | ----- | -----     | -----     | -----     |

(S)-7b-(v)

B3LYP/6-31G(d,p) optimized geometry [E = -996.99208920 hartrees]

Cartesian coordinates (Angstroms)

| Center<br>Number | Atomic<br>Number | Coordinates (Angstroms) |          |           |
|------------------|------------------|-------------------------|----------|-----------|
| -----            | -----            | X                       | Y        | Z         |
| -----            | -----            | -----                   | -----    | -----     |
| 1                | 1                | -3.327356               | 1.089304 | -1.99104  |
| 2                | 6                | -3.203033               | 0.820402 | -0.94759  |
| 3                | 6                | -2.79929                | 0.147326 | 1.73334   |
| 4                | 6                | -1.891881               | 0.661498 | -0.466732 |
| 5                | 6                | -4.294076               | 0.650473 | -0.108366 |
| 6                | 6                | -4.086204               | 0.320124 | 1.238708  |
| 7                | 6                | -1.701023               | 0.31057  | 0.879793  |
| 8                | 1                | -5.301951               | 0.778032 | -0.490081 |
| 9                | 1                | -4.934857               | 0.191283 | 1.904178  |
| 10               | 1                | -2.618858               | -0.11449 | 2.770665  |
| 11               | 6                | -0.718163               | 0.892502 | -1.317134 |

|       |       |           |           |           |
|-------|-------|-----------|-----------|-----------|
| 12    | 7     | 1.689647  | 1.237693  | -1.158829 |
| 13    | 6     | 0.41153   | 1.415955  | -3.286242 |
| 14    | 6     | 1.517261  | 1.991392  | -2.407539 |
| 15    | 7     | -0.839387 | 1.215292  | -2.555743 |
| 16    | 6     | 0.622504  | 0.74179   | -0.662132 |
| 17    | 1     | 0.722611  | 0.444855  | -3.703018 |
| 18    | 1     | 1.286152  | 3.032608  | -2.137677 |
| 19    | 1     | 0.216106  | 2.072647  | -4.140301 |
| 20    | 1     | 2.474343  | 2.006635  | -2.938333 |
| 21    | 8     | -0.466267 | 0.138363  | 1.438154  |
| 22    | 6     | 0.685525  | -0.116698 | 0.59844   |
| 23    | 6     | 0.703223  | -1.607992 | 0.19827   |
| 24    | 6     | 0.841837  | -4.337676 | -0.459535 |
| 25    | 6     | -0.07794  | -2.545351 | 0.883761  |
| 26    | 6     | 1.561213  | -2.055711 | -0.815875 |
| 27    | 6     | 1.630682  | -3.41002  | -1.140957 |
| 28    | 6     | -0.010135 | -3.899862 | 0.554116  |
| 29    | 1     | -0.737713 | -2.215125 | 1.676929  |
| 30    | 1     | 2.178912  | -1.340865 | -1.350206 |
| 31    | 1     | 2.300571  | -3.738603 | -1.93036  |
| 32    | 1     | -0.626456 | -4.613123 | 1.093835  |
| 33    | 1     | 0.89172   | -5.391816 | -0.715854 |
| 34    | 6     | 1.914026  | 0.1816    | 1.492773  |
| 35    | 1     | 2.793908  | -0.165711 | 0.947077  |
| 36    | 1     | 1.806215  | -0.474036 | 2.364352  |
| 37    | 6     | 2.129512  | 1.622367  | 1.943861  |
| 38    | 6     | 1.253964  | 2.278076  | 2.712678  |
| 39    | 1     | 1.4486    | 3.298396  | 3.032502  |
| 40    | 1     | 0.324451  | 1.827707  | 3.040423  |
| 41    | 6     | 3.434977  | 2.246939  | 1.518123  |
| 42    | 1     | 4.286842  | 1.669704  | 1.902818  |
| 43    | 1     | 3.516889  | 2.245613  | 0.426211  |
| 44    | 1     | 3.531139  | 3.272975  | 1.884094  |
| ----- | ----- | -----     | -----     | -----     |

XI. Representative Spectral Data:  $^1\text{H}$  and  $^{13}\text{C}$  NMR of Select Compounds.

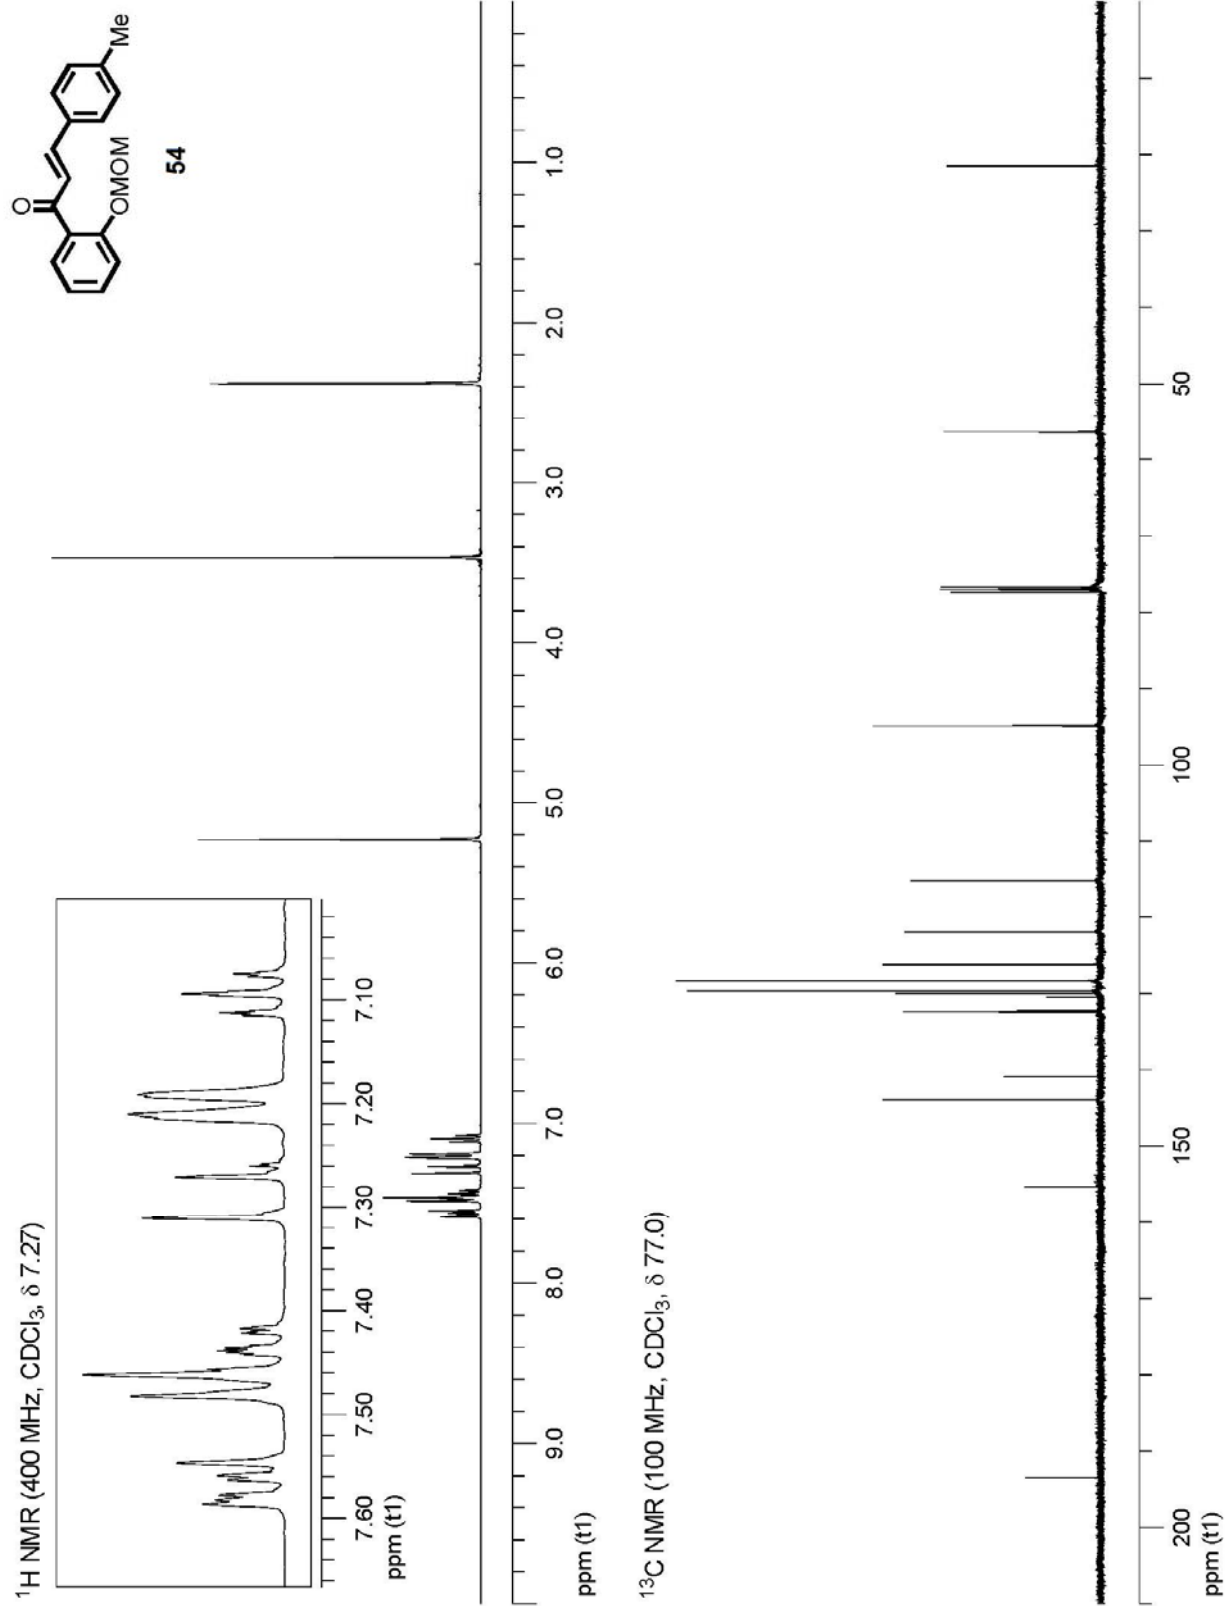

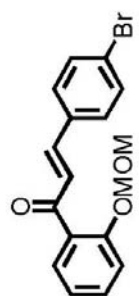

56

<sup>1</sup>H NMR (400 MHz, CDCl<sub>3</sub>, δ 7.27)

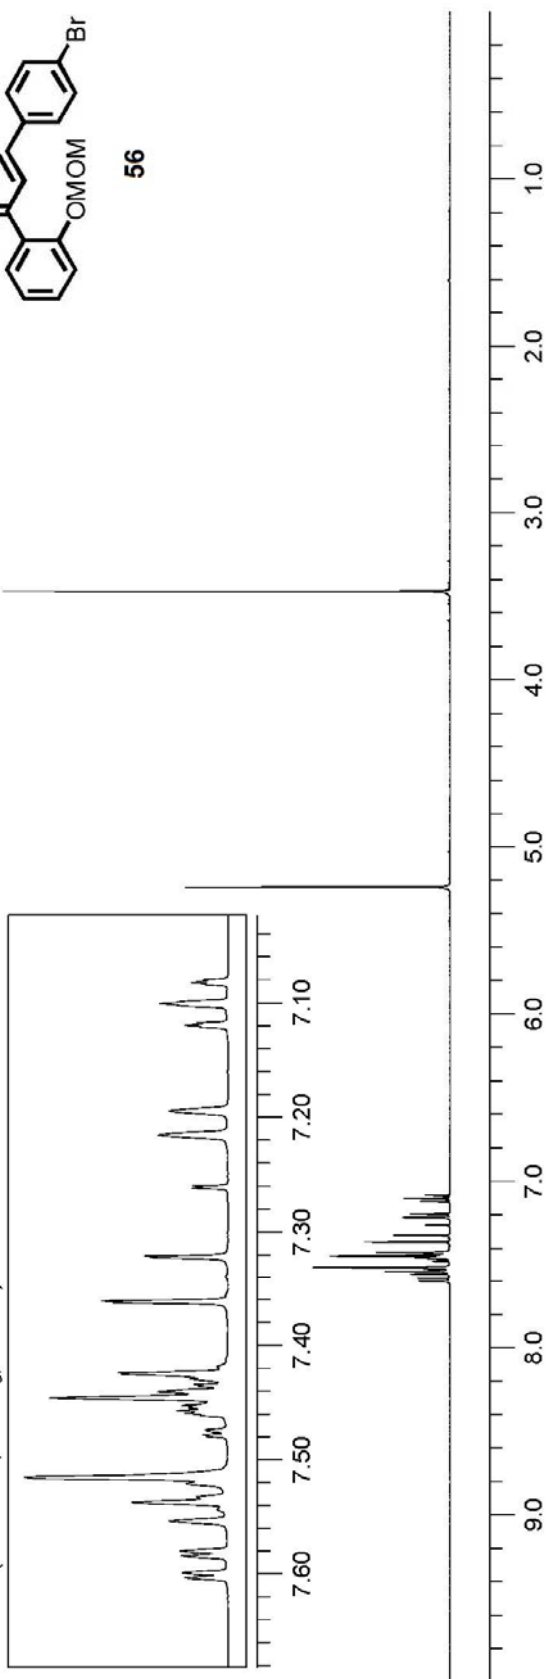

<sup>13</sup>C NMR (100 MHz, CDCl<sub>3</sub>, δ 77.0)

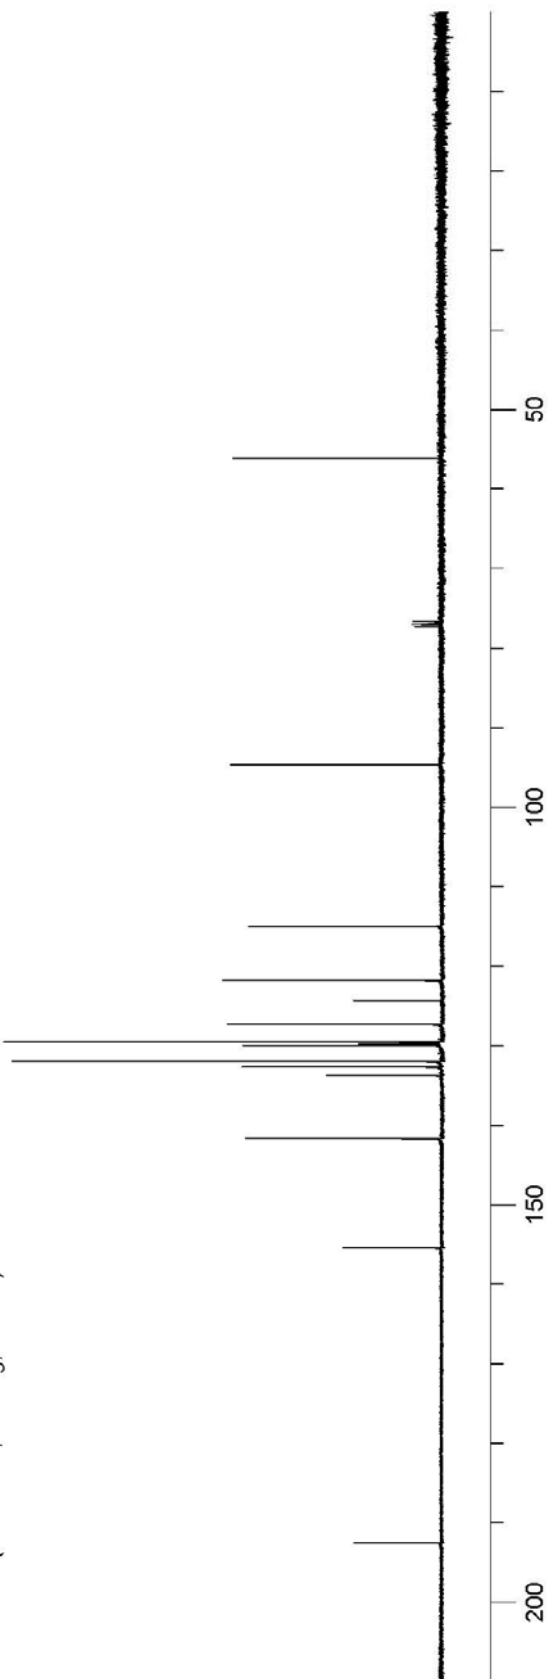

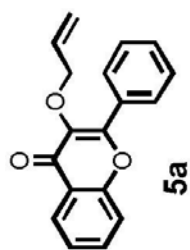

$^1\text{H}$  NMR (400 MHz,  $\text{CDCl}_3$ ,  $\delta$  7.27)

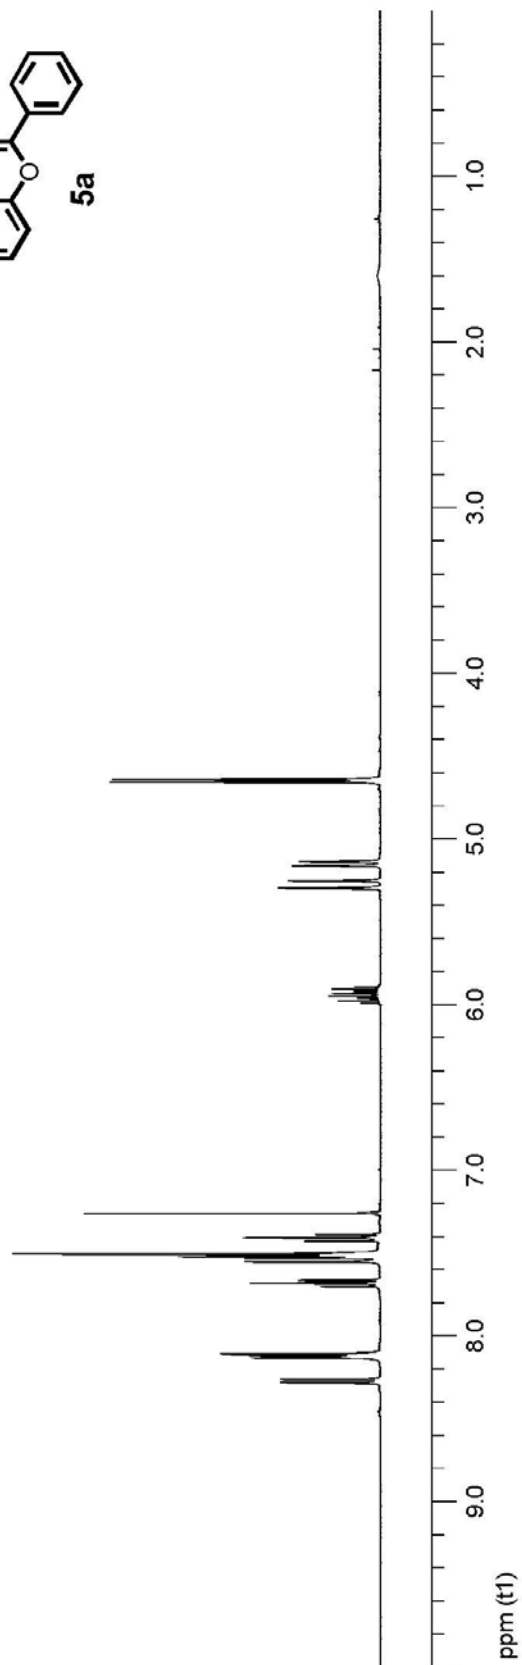

$^{13}\text{C}$  NMR (100 MHz,  $\text{CDCl}_3$ ,  $\delta$  77.0)

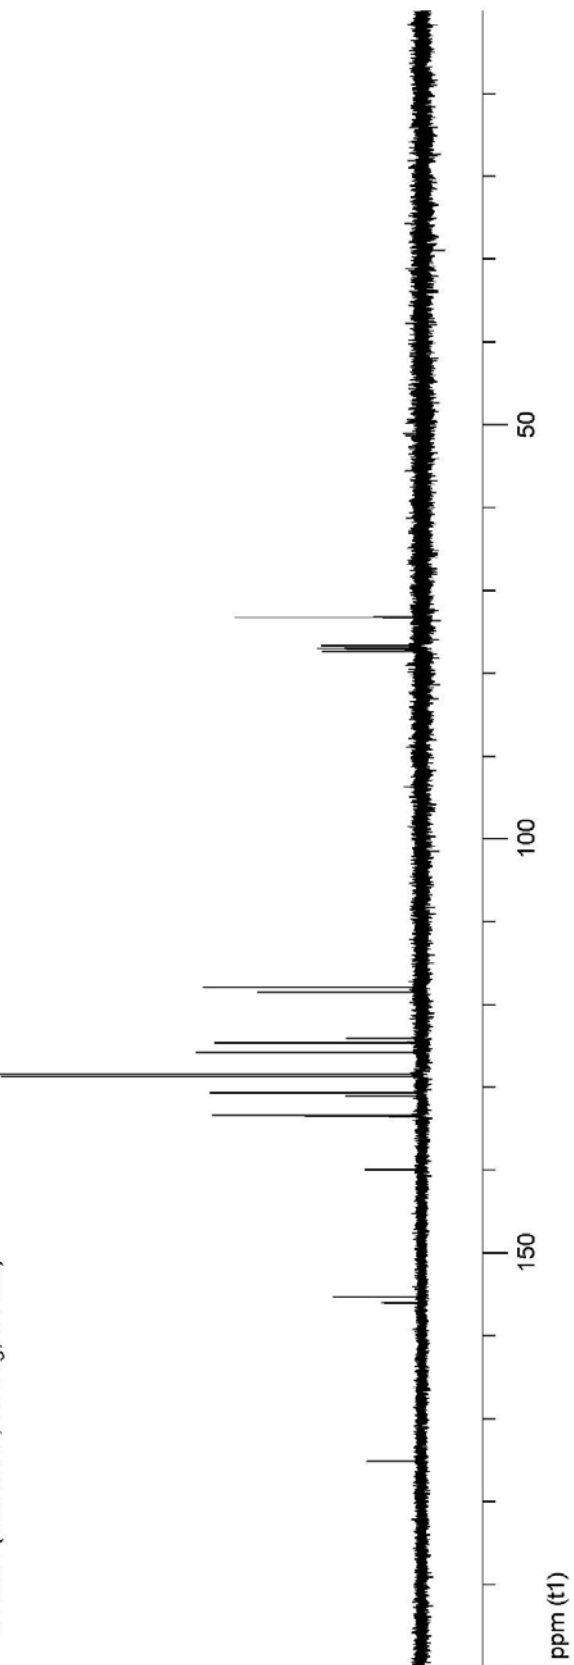

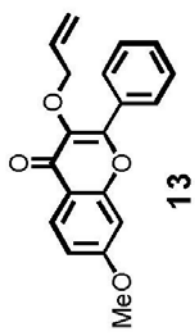

$^1\text{H}$  NMR (400 MHz,  $\text{CDCl}_3$ ,  $\delta$  7.27)

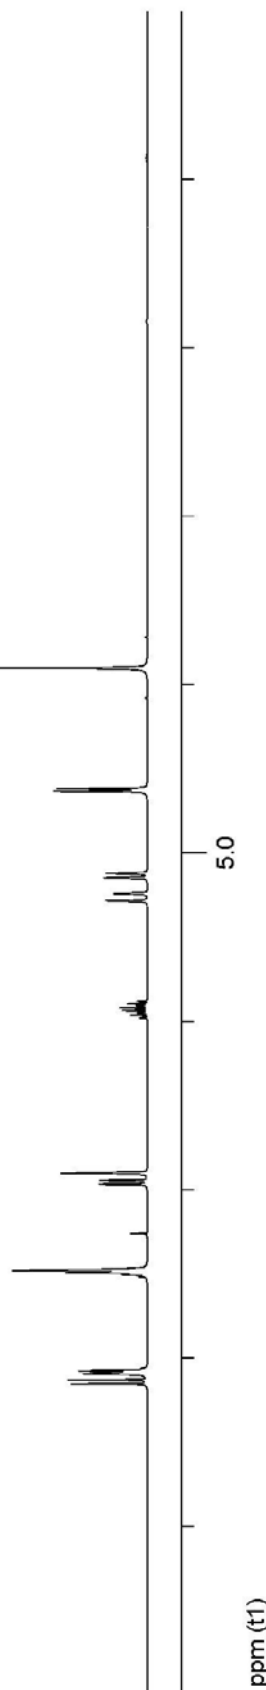

$^{13}\text{C}$  NMR (100 MHz,  $\text{CDCl}_3$ ,  $\delta$  77.0)

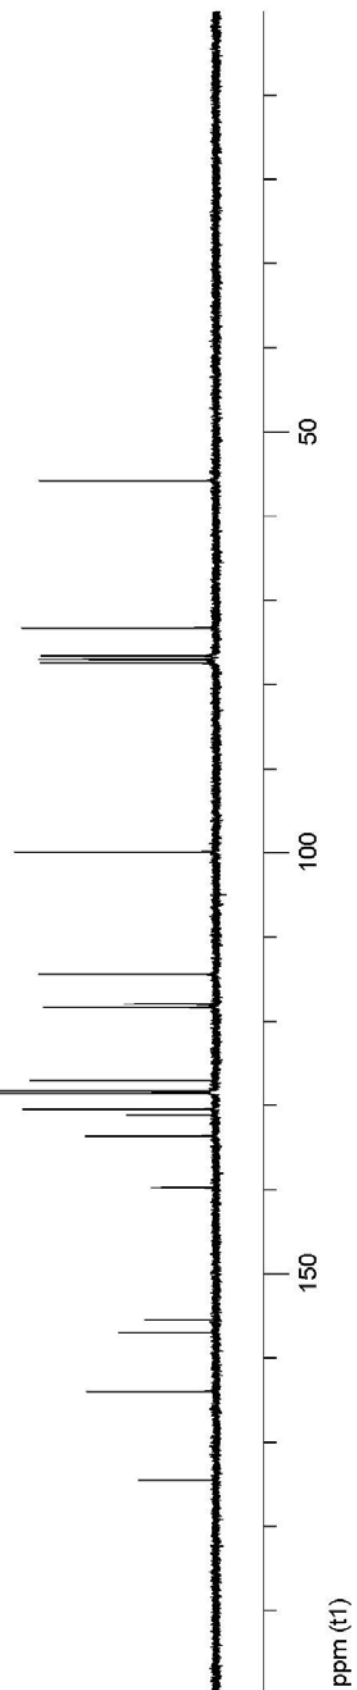

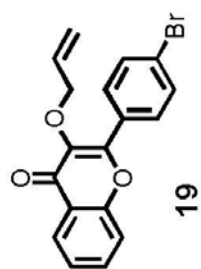

$^1\text{H}$  NMR (400 MHz,  $\text{CDCl}_3$ ,  $\delta$  7.27)

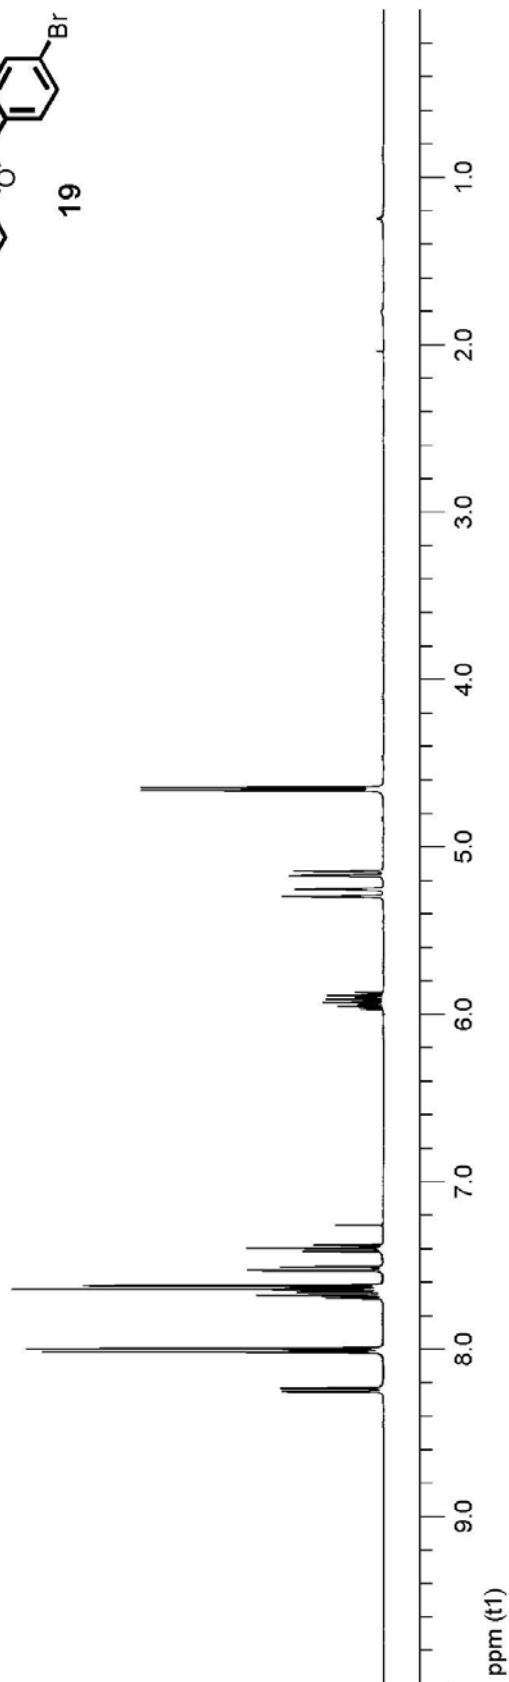

$^{13}\text{C}$  NMR (100 MHz,  $\text{CDCl}_3$ ,  $\delta$  77.0)

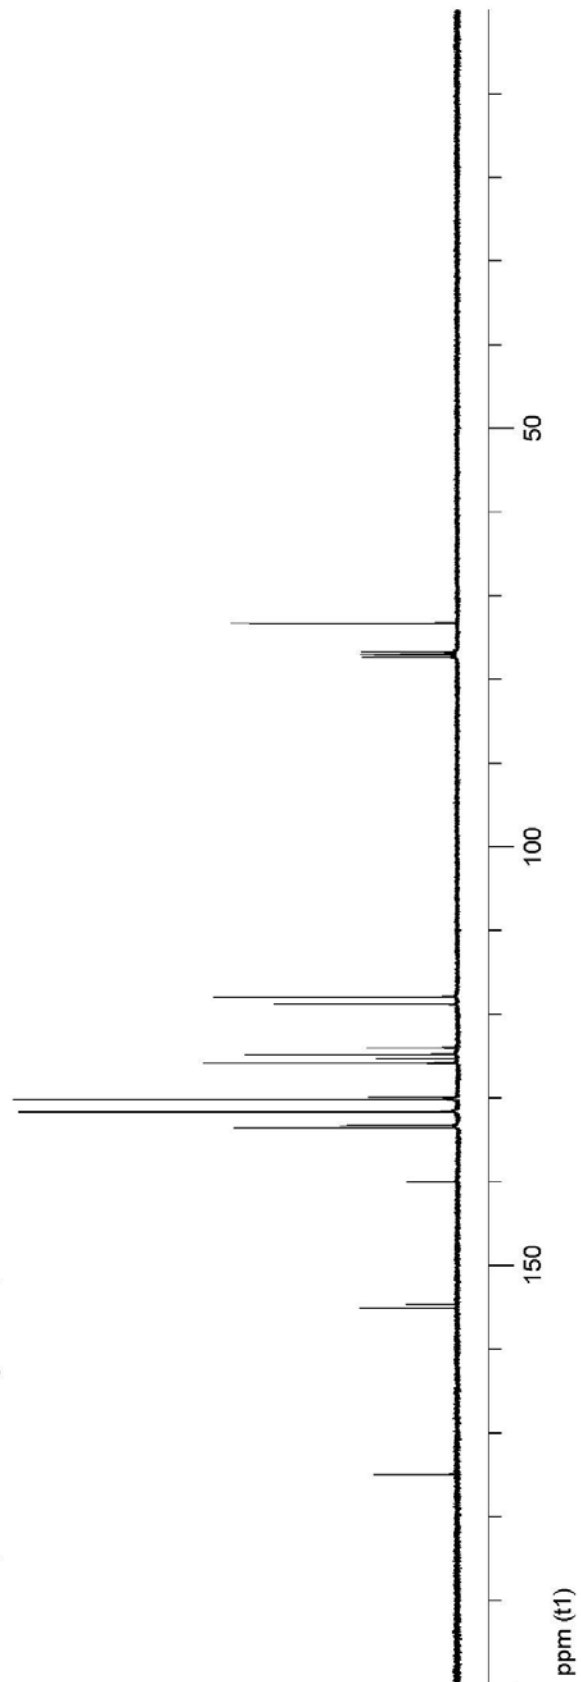

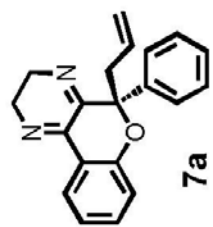

<sup>1</sup>H NMR (400 MHz, CDCl<sub>3</sub>, δ 7.27)

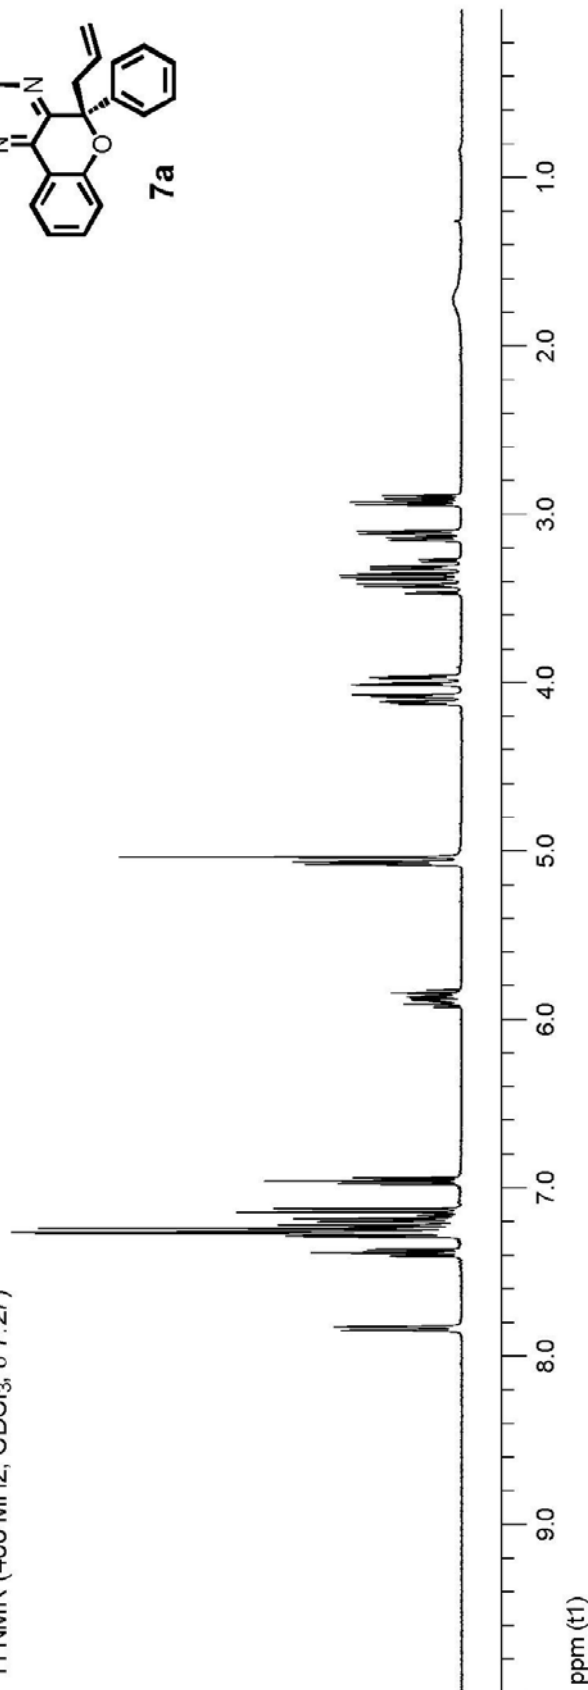

<sup>13</sup>C NMR (100 MHz, CDCl<sub>3</sub>, δ 77.0)

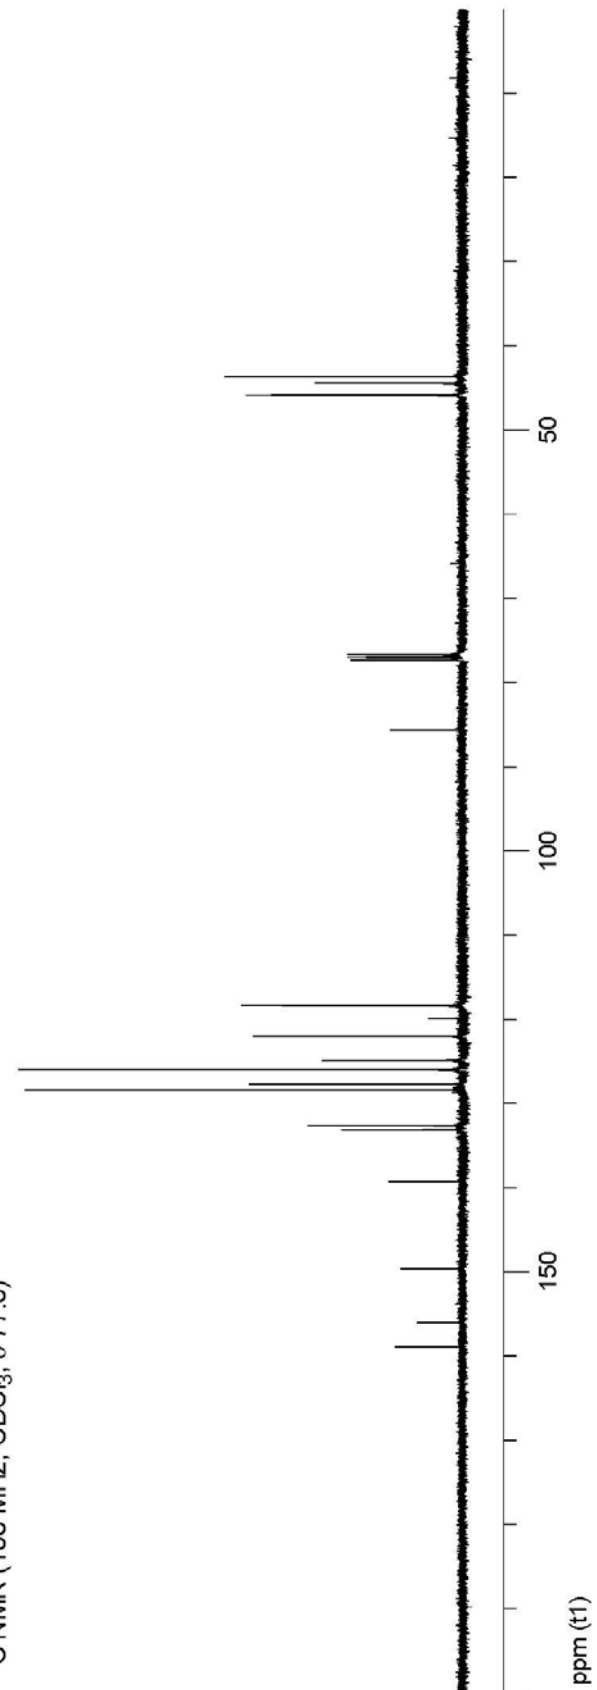



$^1\text{H}$  NMR (400 MHz,  $\text{CDCl}_3$ ,  $\delta$  7.27)

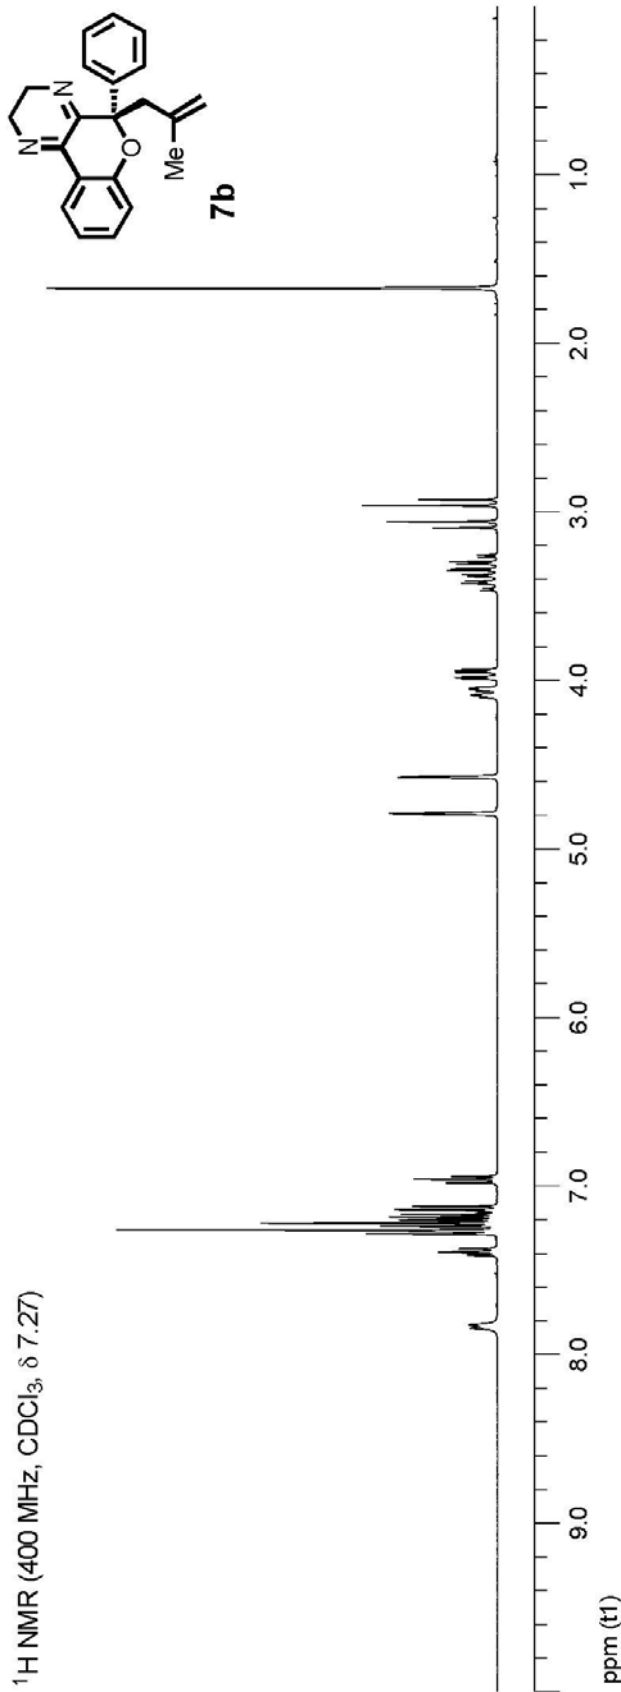

$^{13}\text{C}$  NMR (100 MHz,  $\text{CDCl}_3$ ,  $\delta$  77.0)

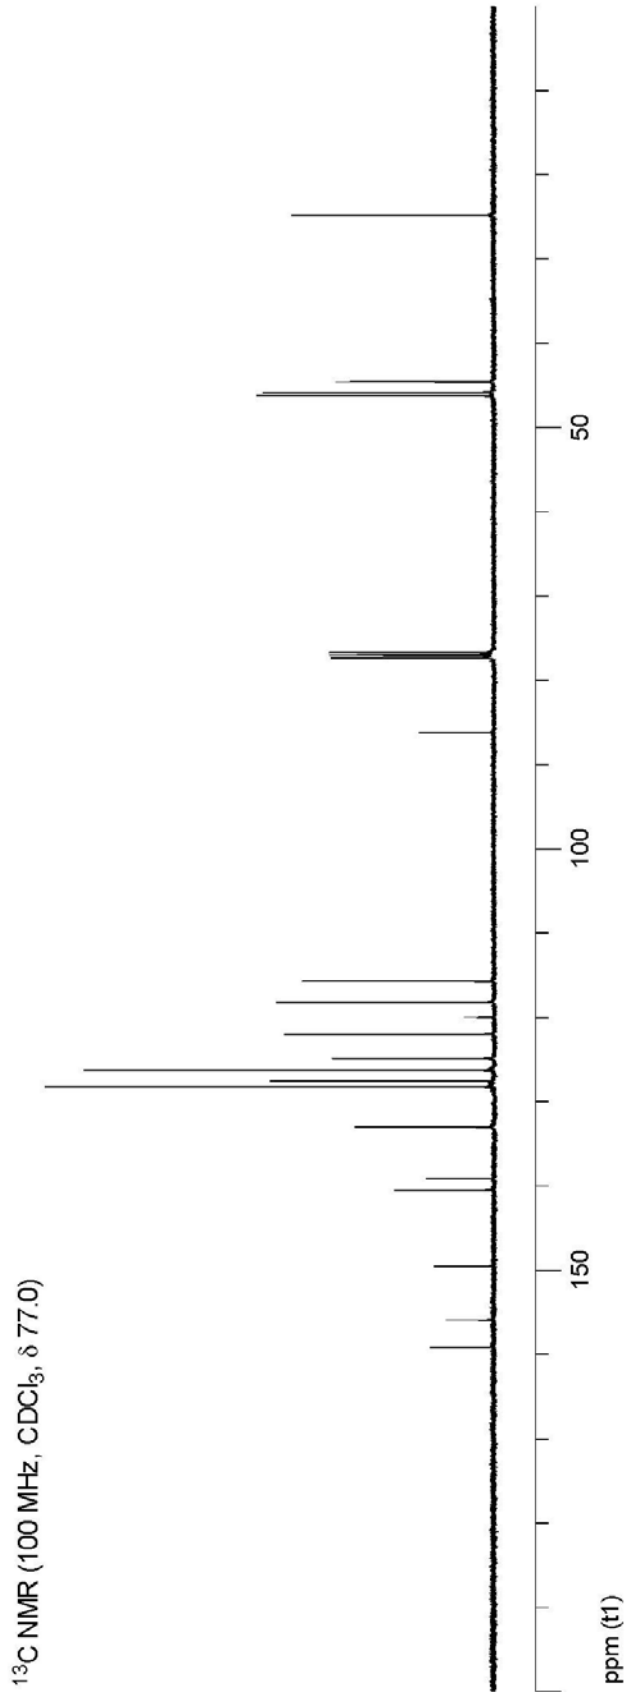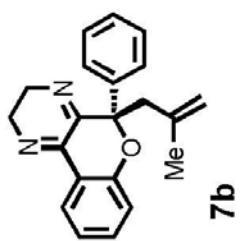

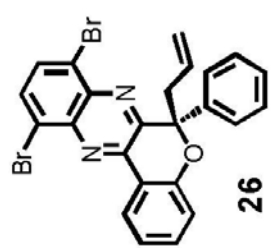

$^1\text{H}$  NMR (400 MHz,  $\text{CDCl}_3$ ,  $\delta$  7.27)

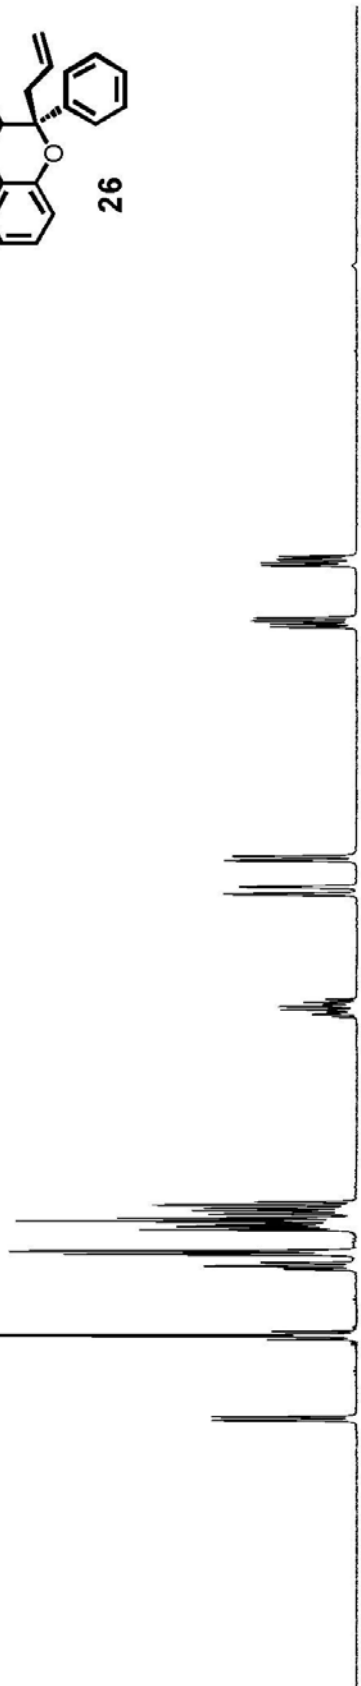

$^{13}\text{C}$  NMR (100 MHz,  $\text{CDCl}_3$ ,  $\delta$  77.0)

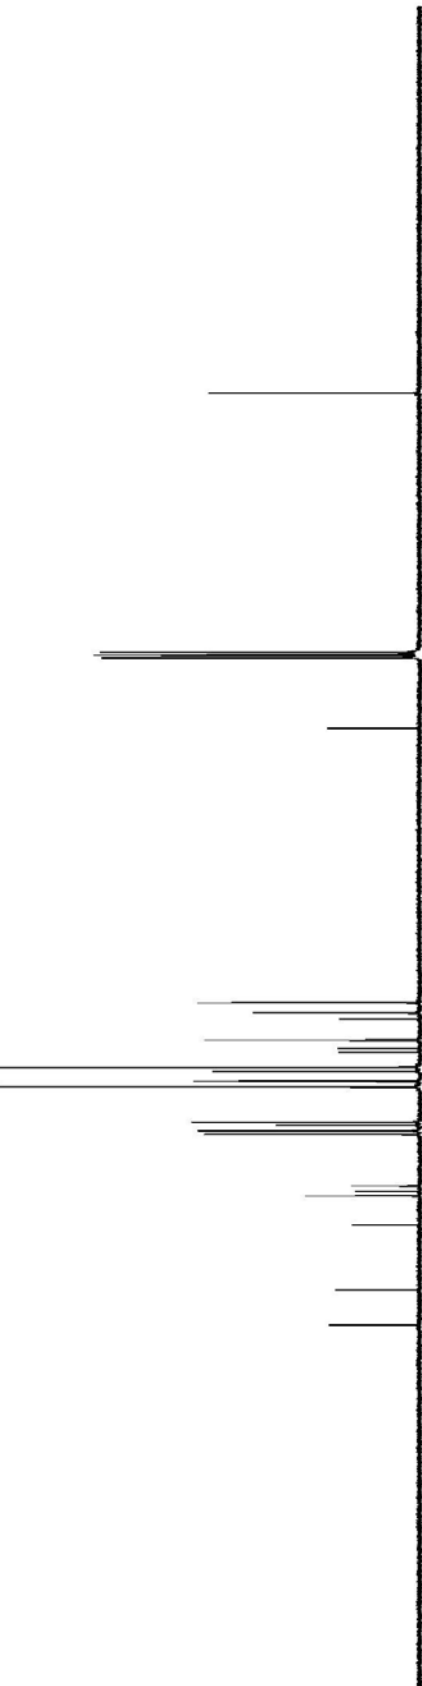

<sup>1</sup>H NMR (400 MHz, CDCl<sub>3</sub>, δ 7.27)

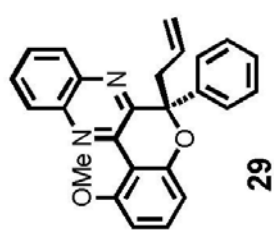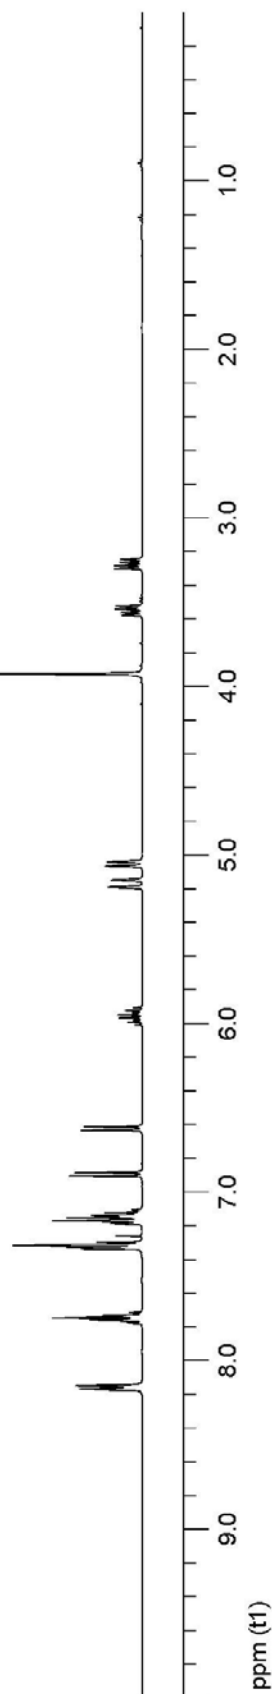

<sup>13</sup>C NMR (100 MHz, CDCl<sub>3</sub>, δ 77.0)

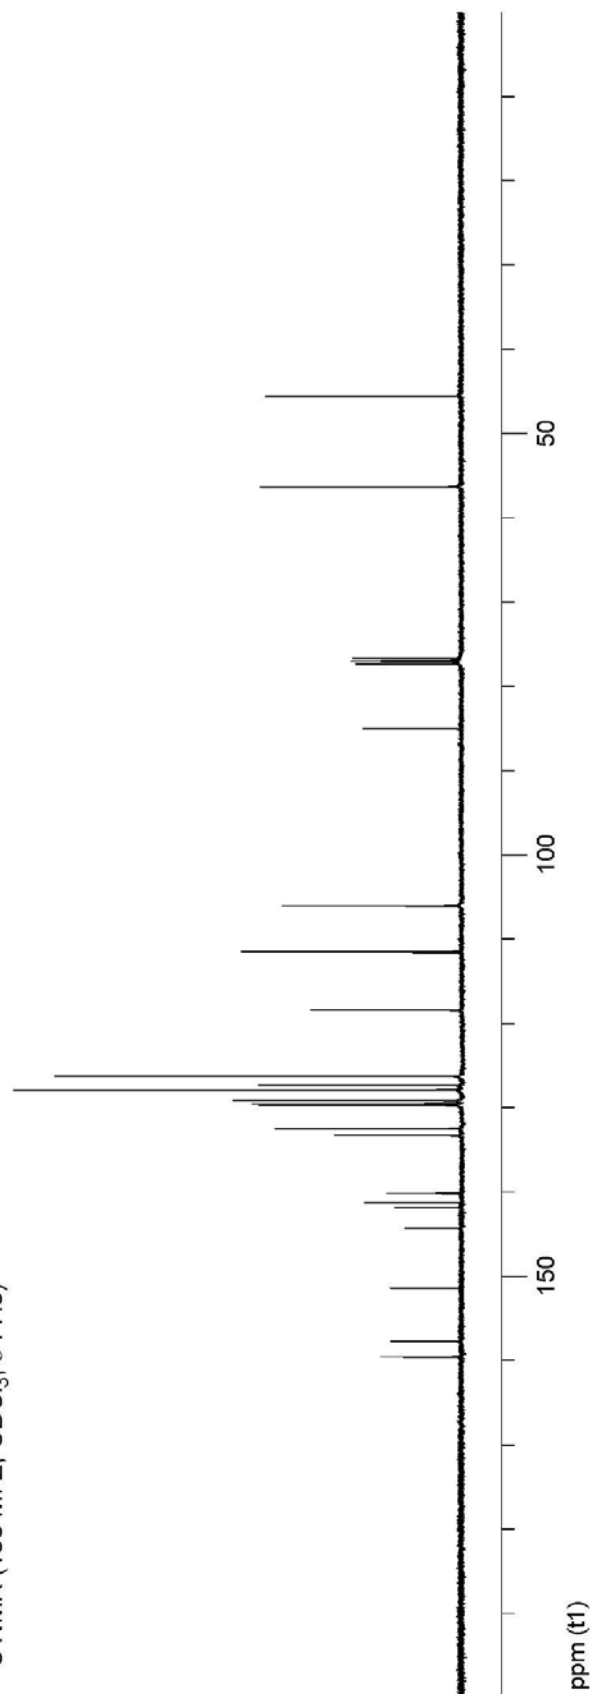

**Figure 8.** Proton NMR spectrum for **53** (400 MHz, CD<sub>2</sub>Cl<sub>2</sub>)

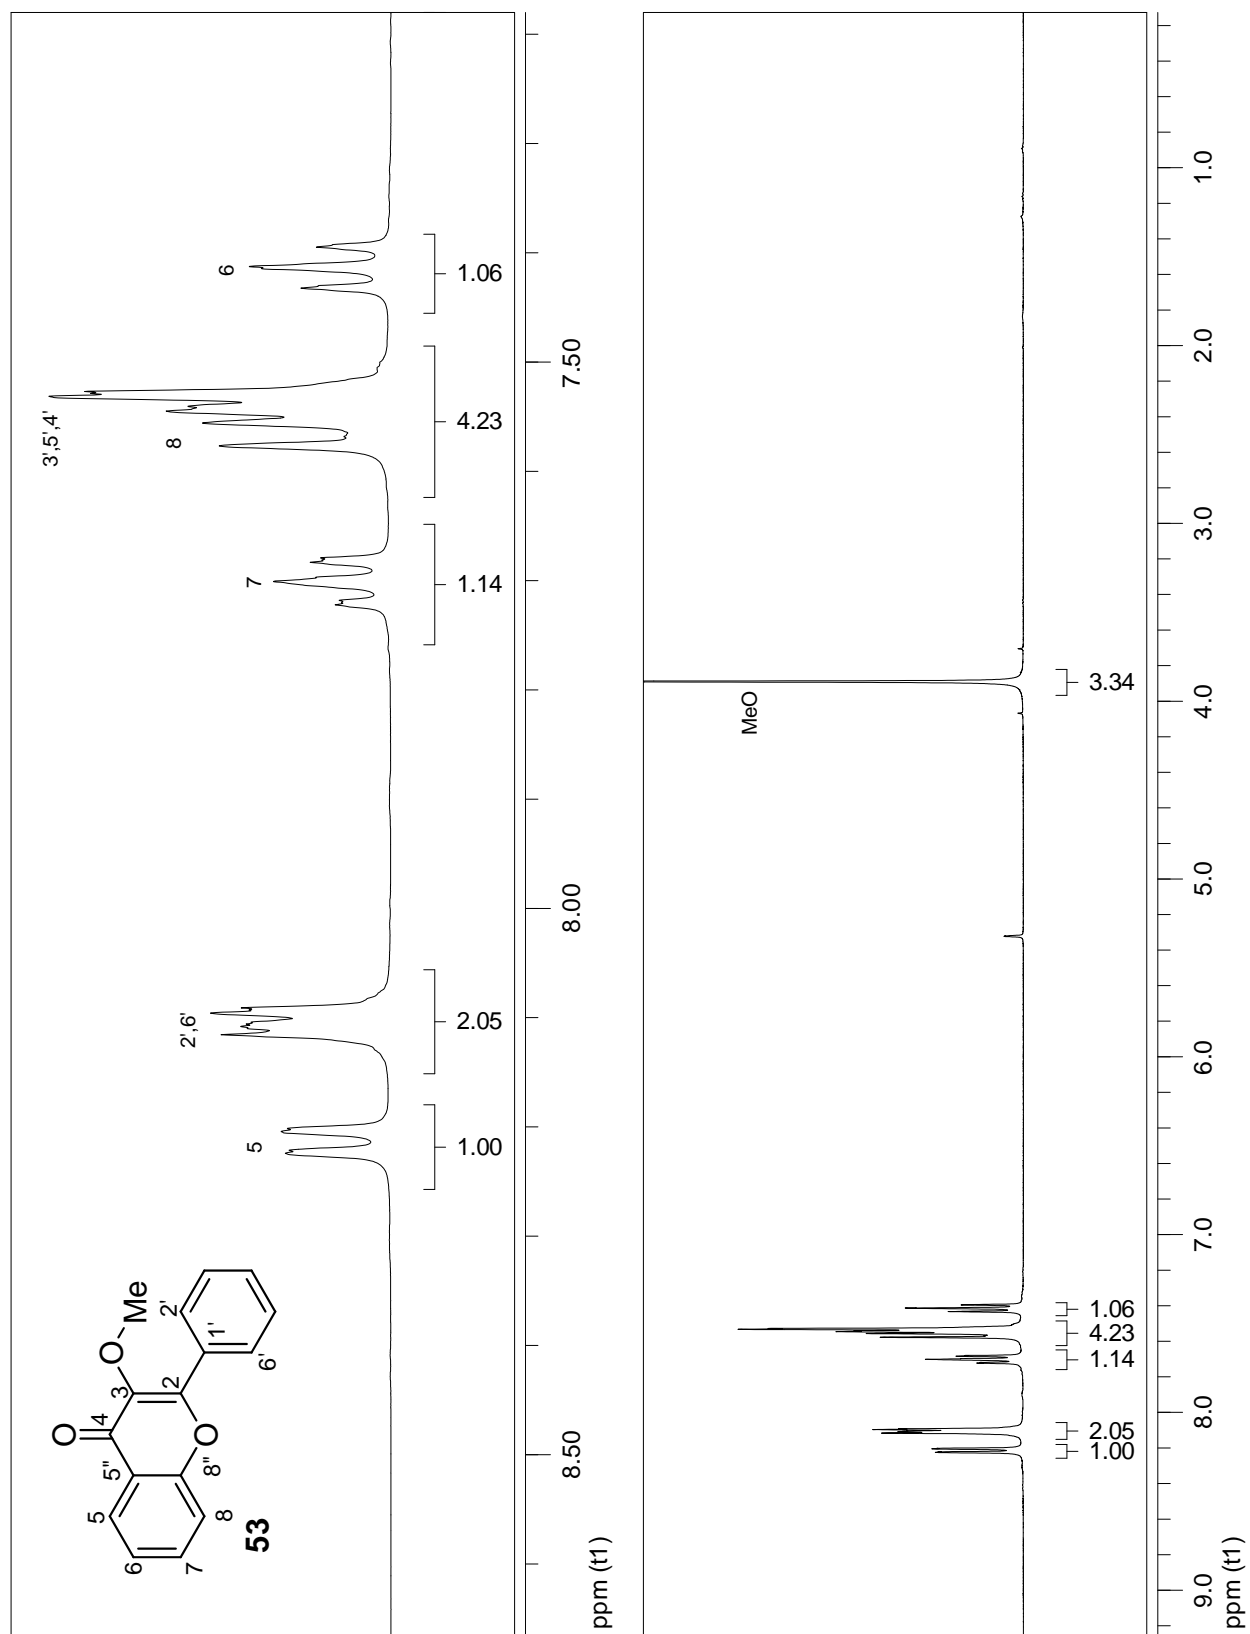

**Figure 9.** Carbon NMR spectrum for **53** (400 MHz, CD<sub>2</sub>Cl<sub>2</sub>)

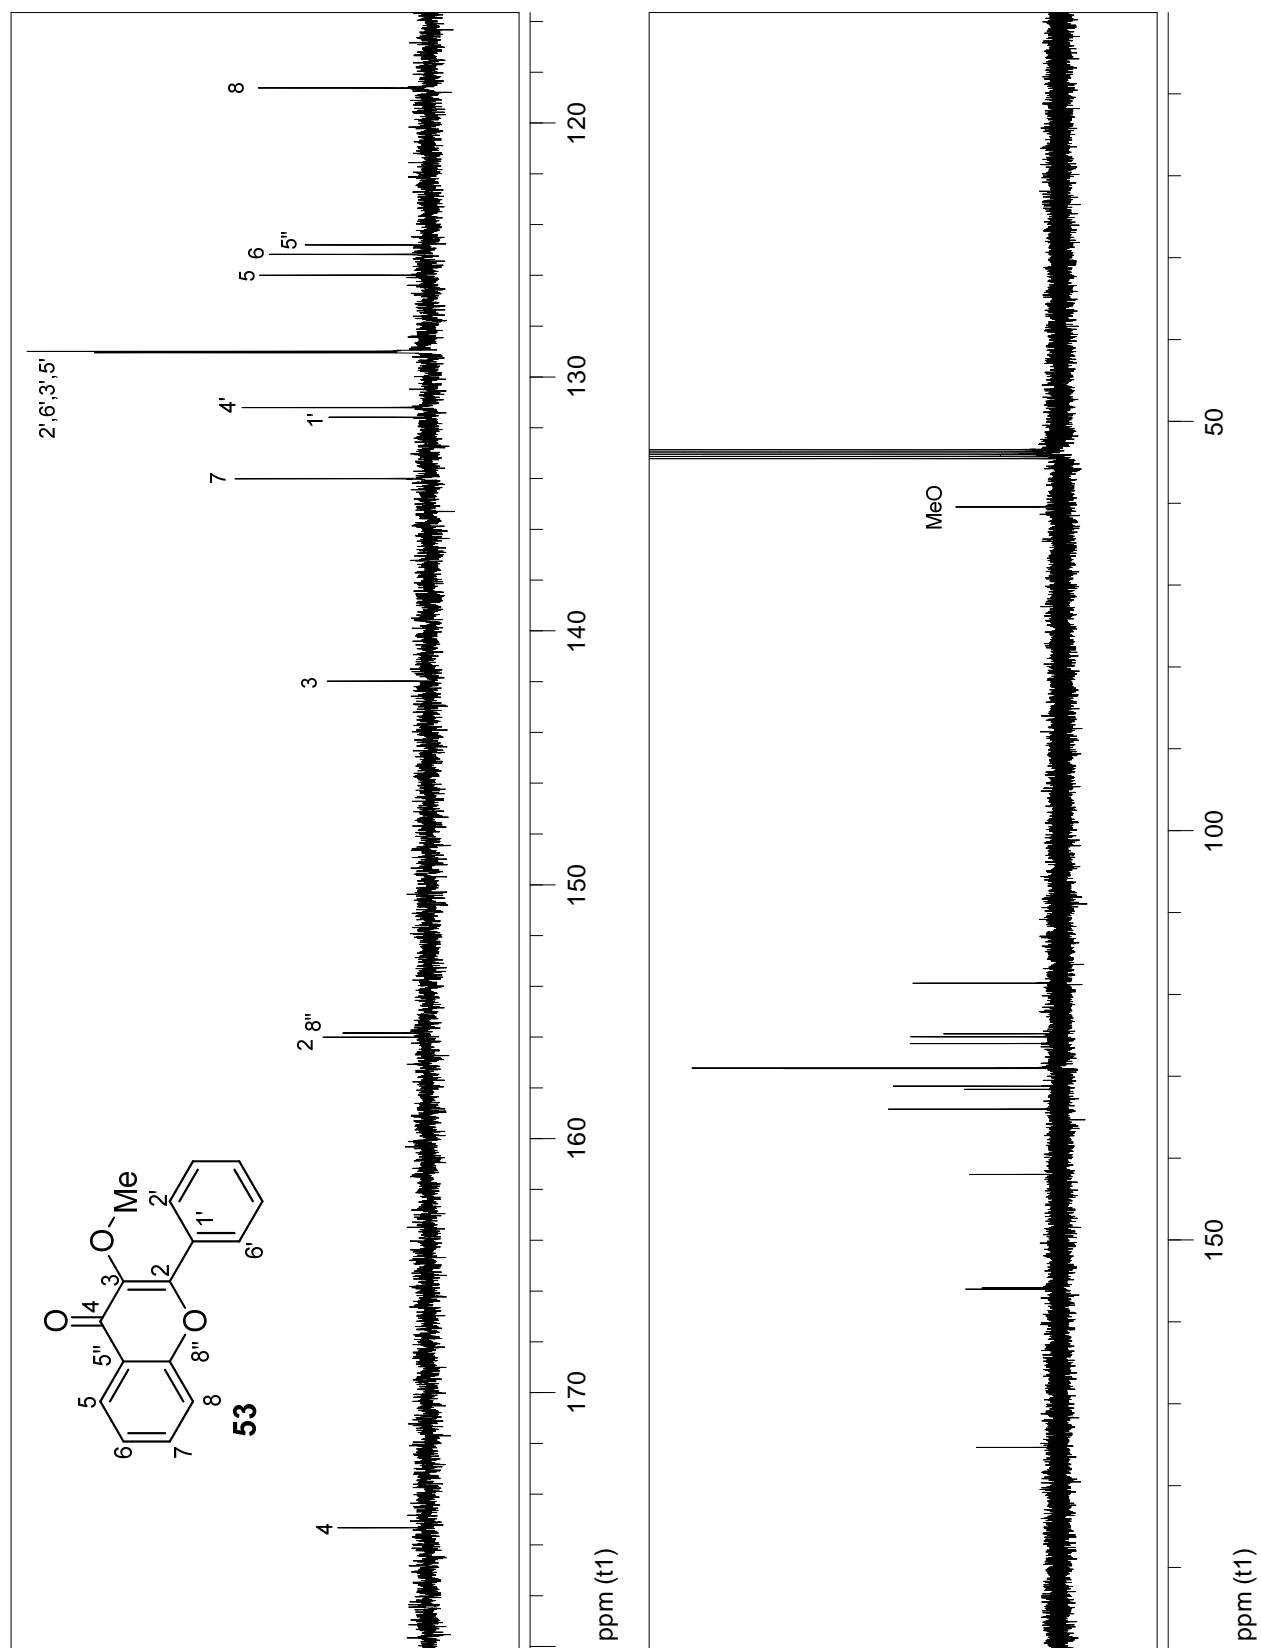

**Figure 10.** gCOSY NMR spectrum for **53** (400 MHz, CD<sub>2</sub>Cl<sub>2</sub>)

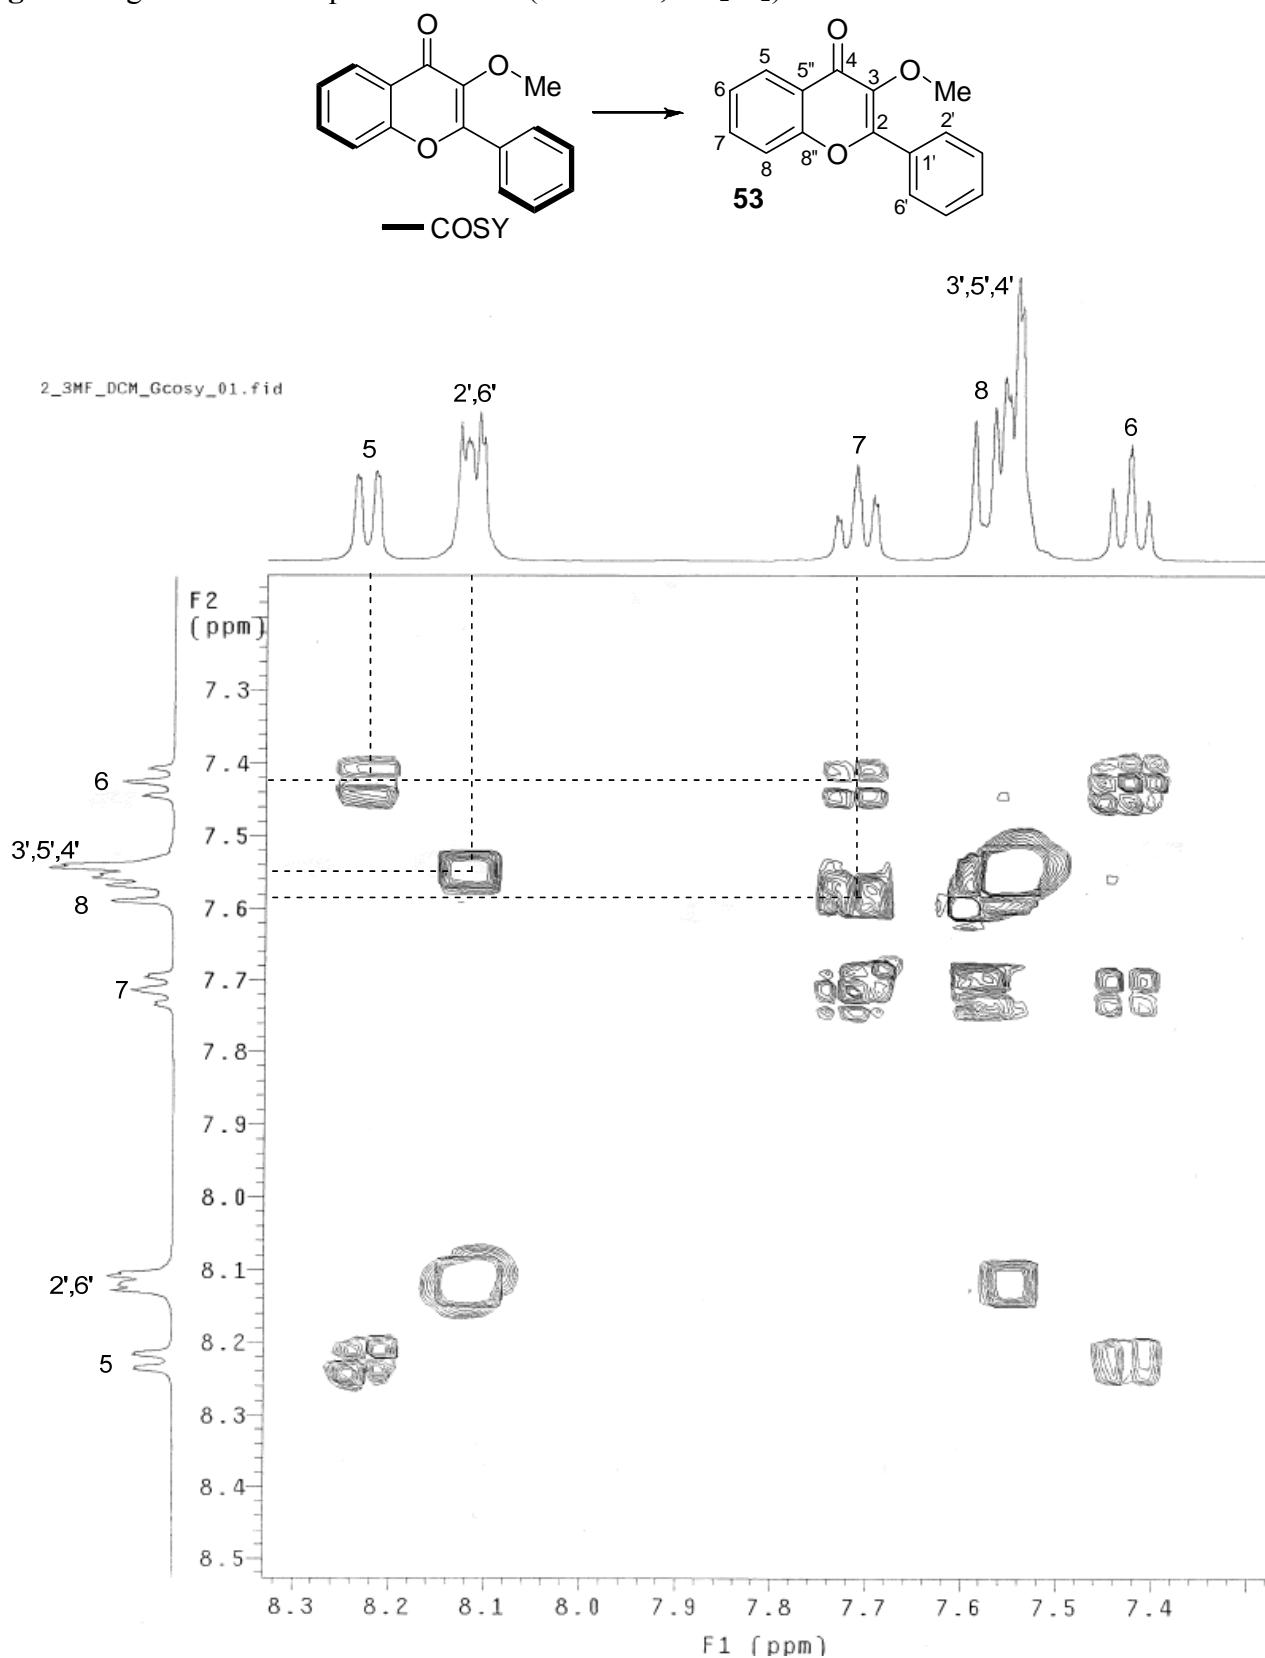

**Figure 11.** gHSQC NMR spectrum for **53** (400 MHz, CD<sub>2</sub>Cl<sub>2</sub>)

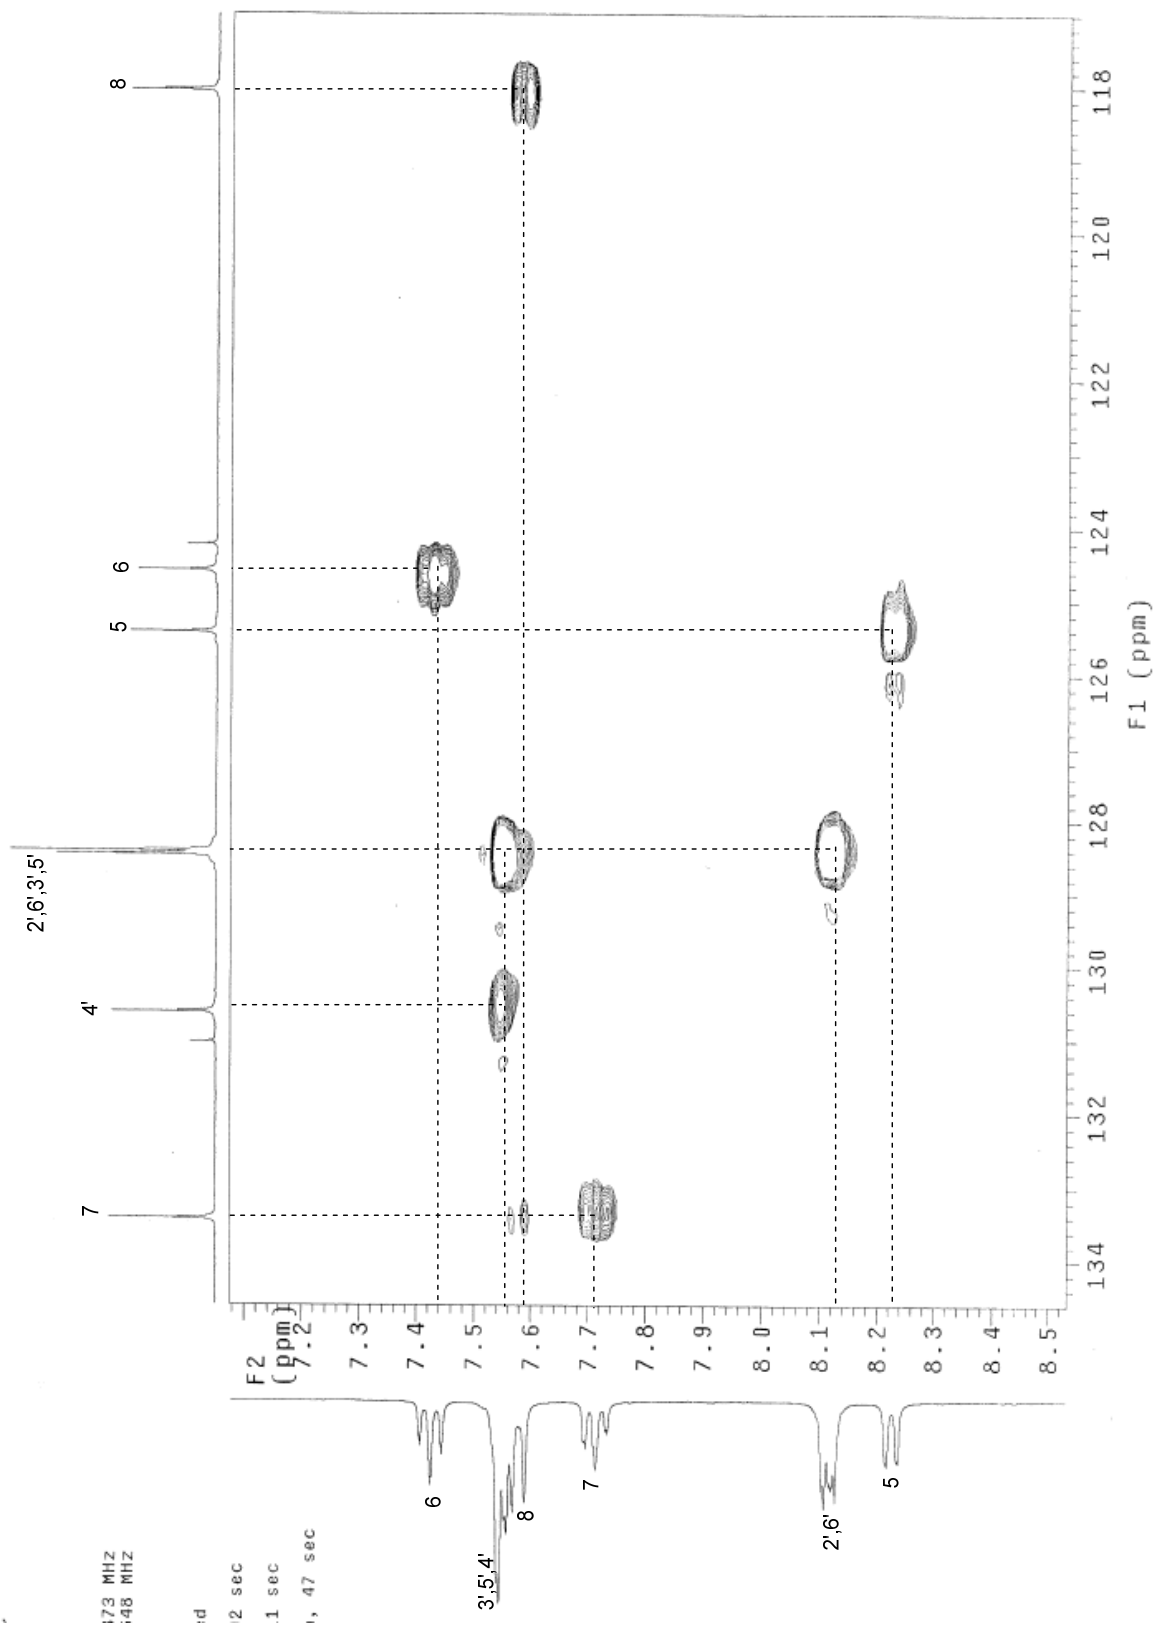

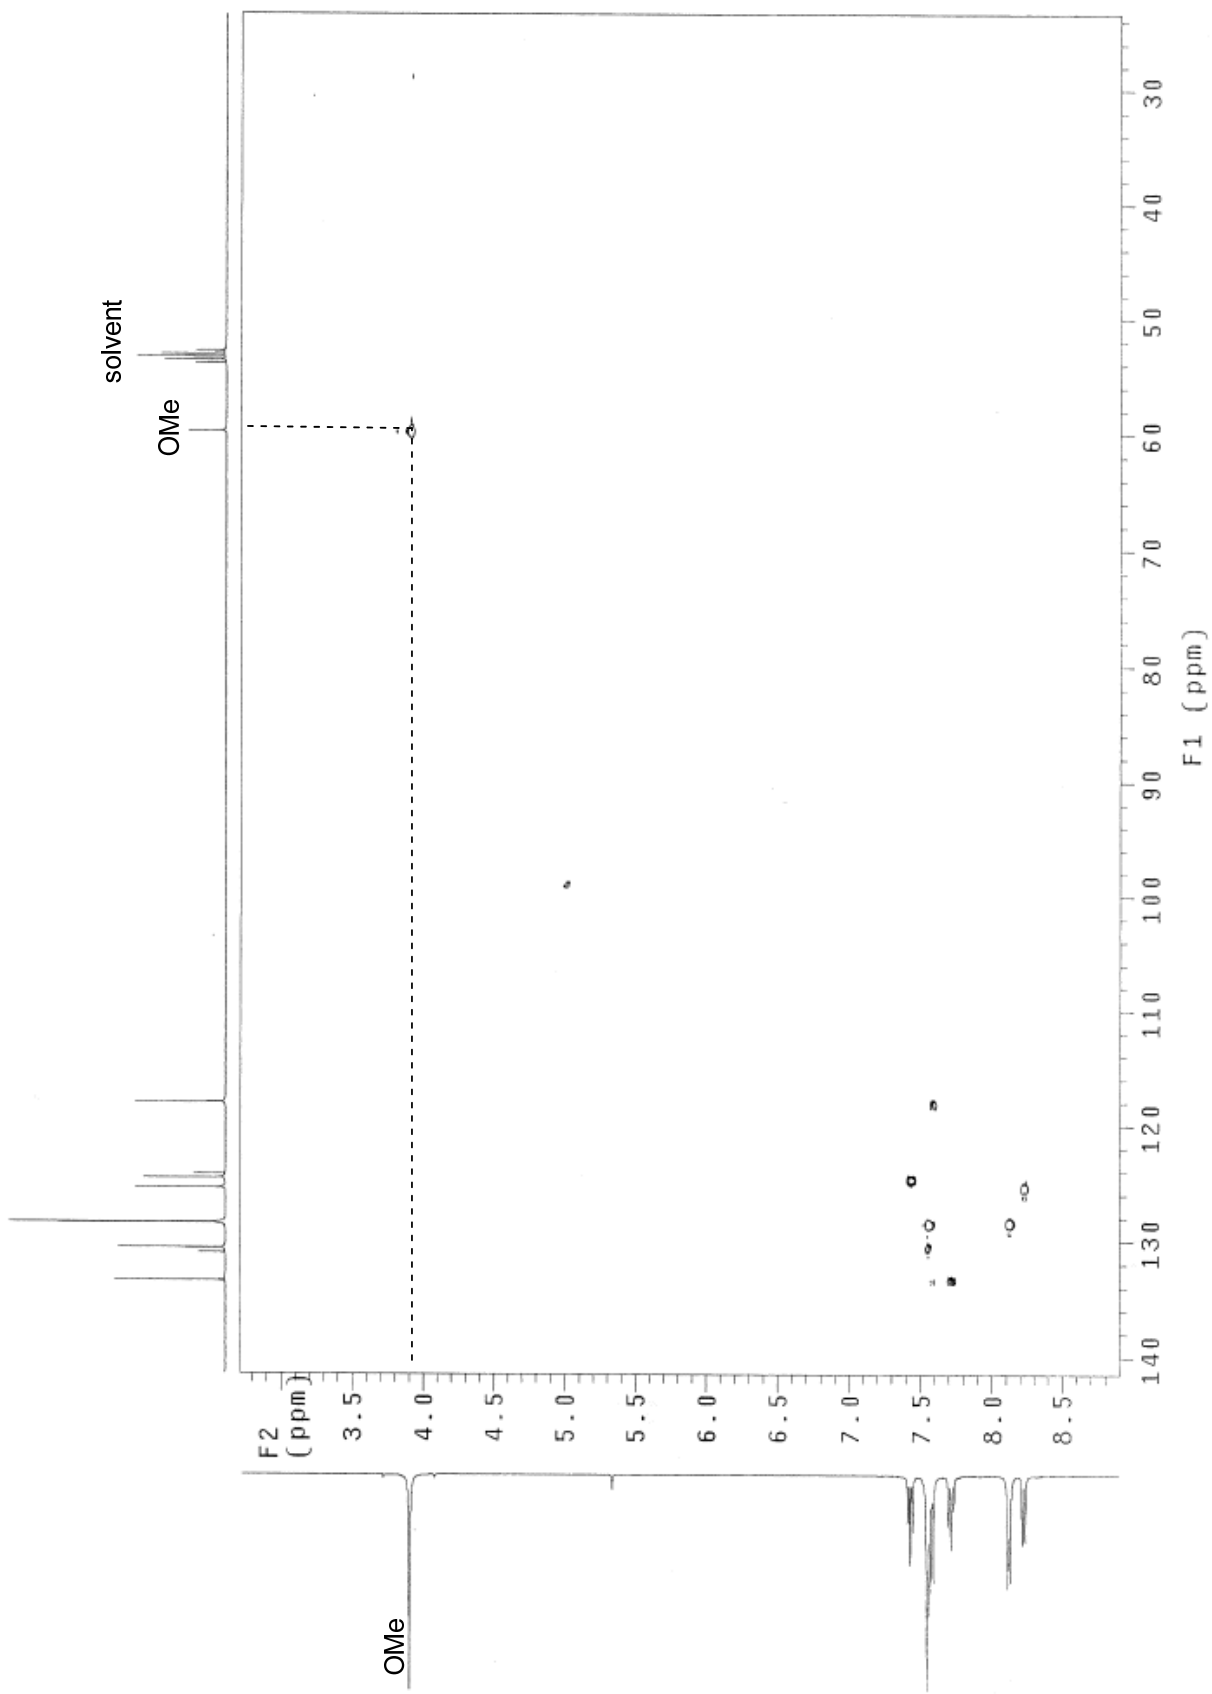



**Figure 12.** gHMBC NMR spectrum for **53**(400 MHz, CD<sub>2</sub>Cl<sub>2</sub>)

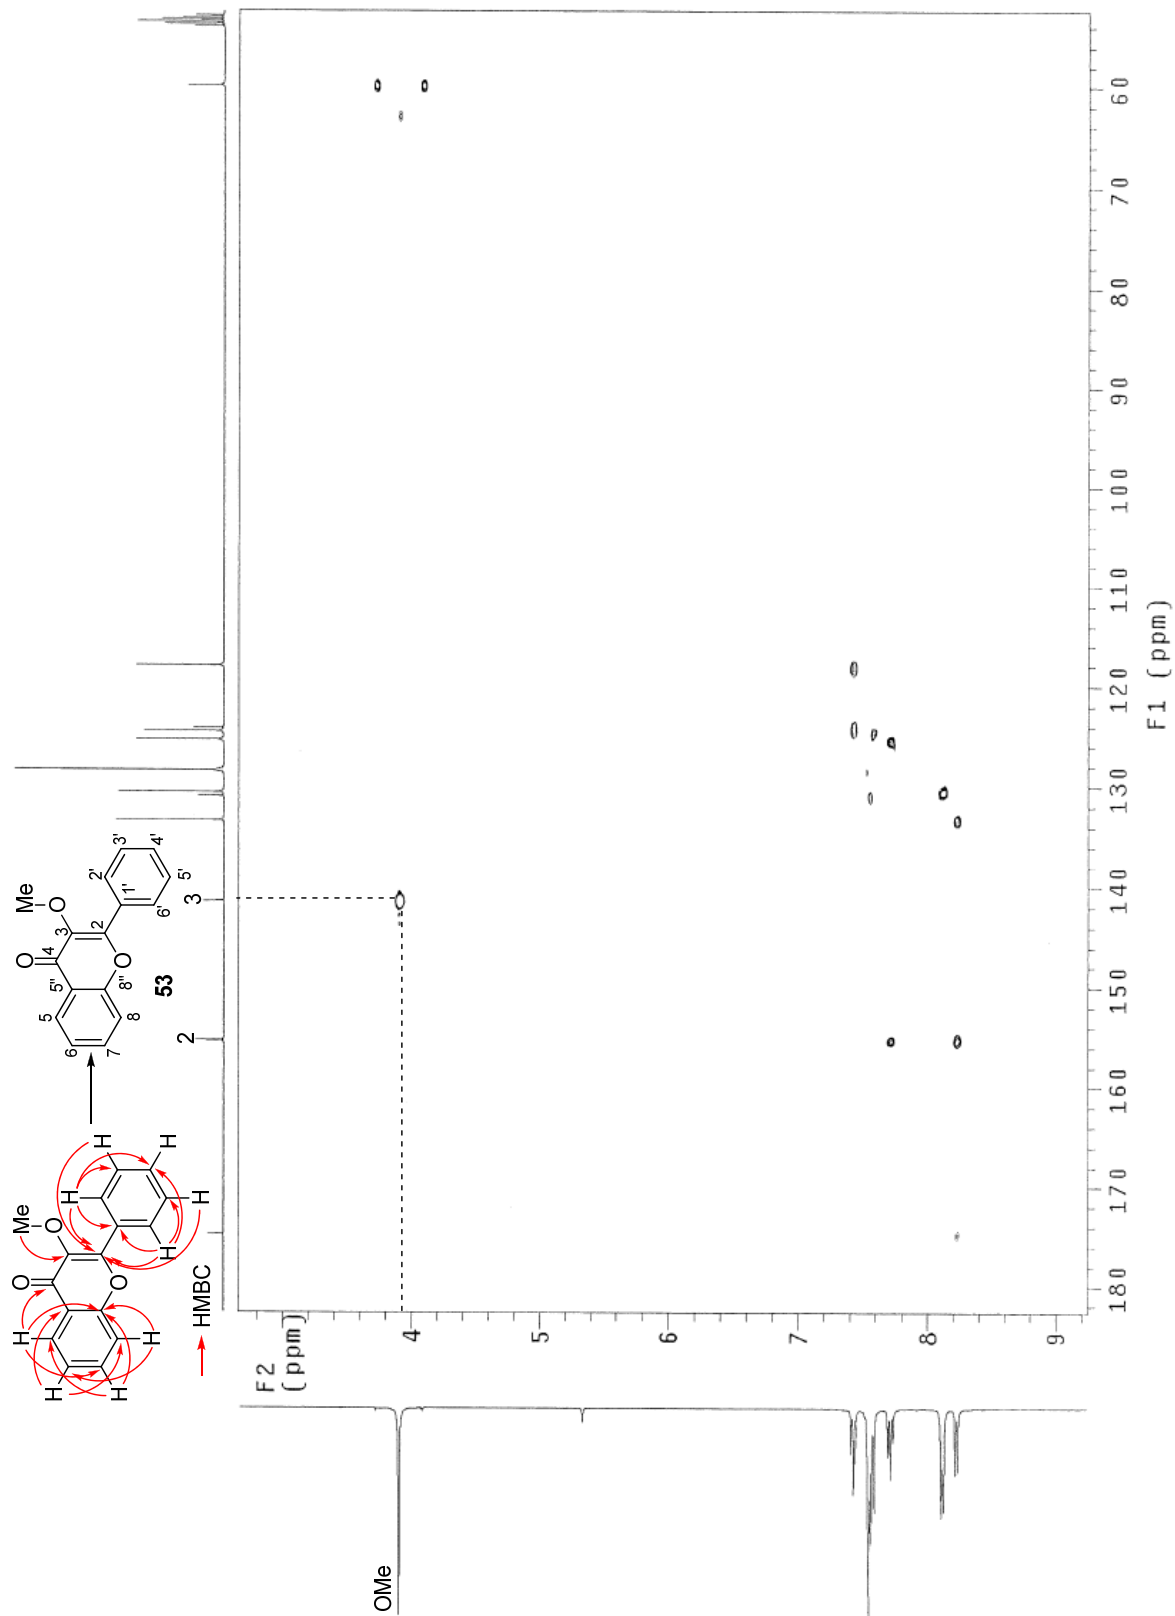

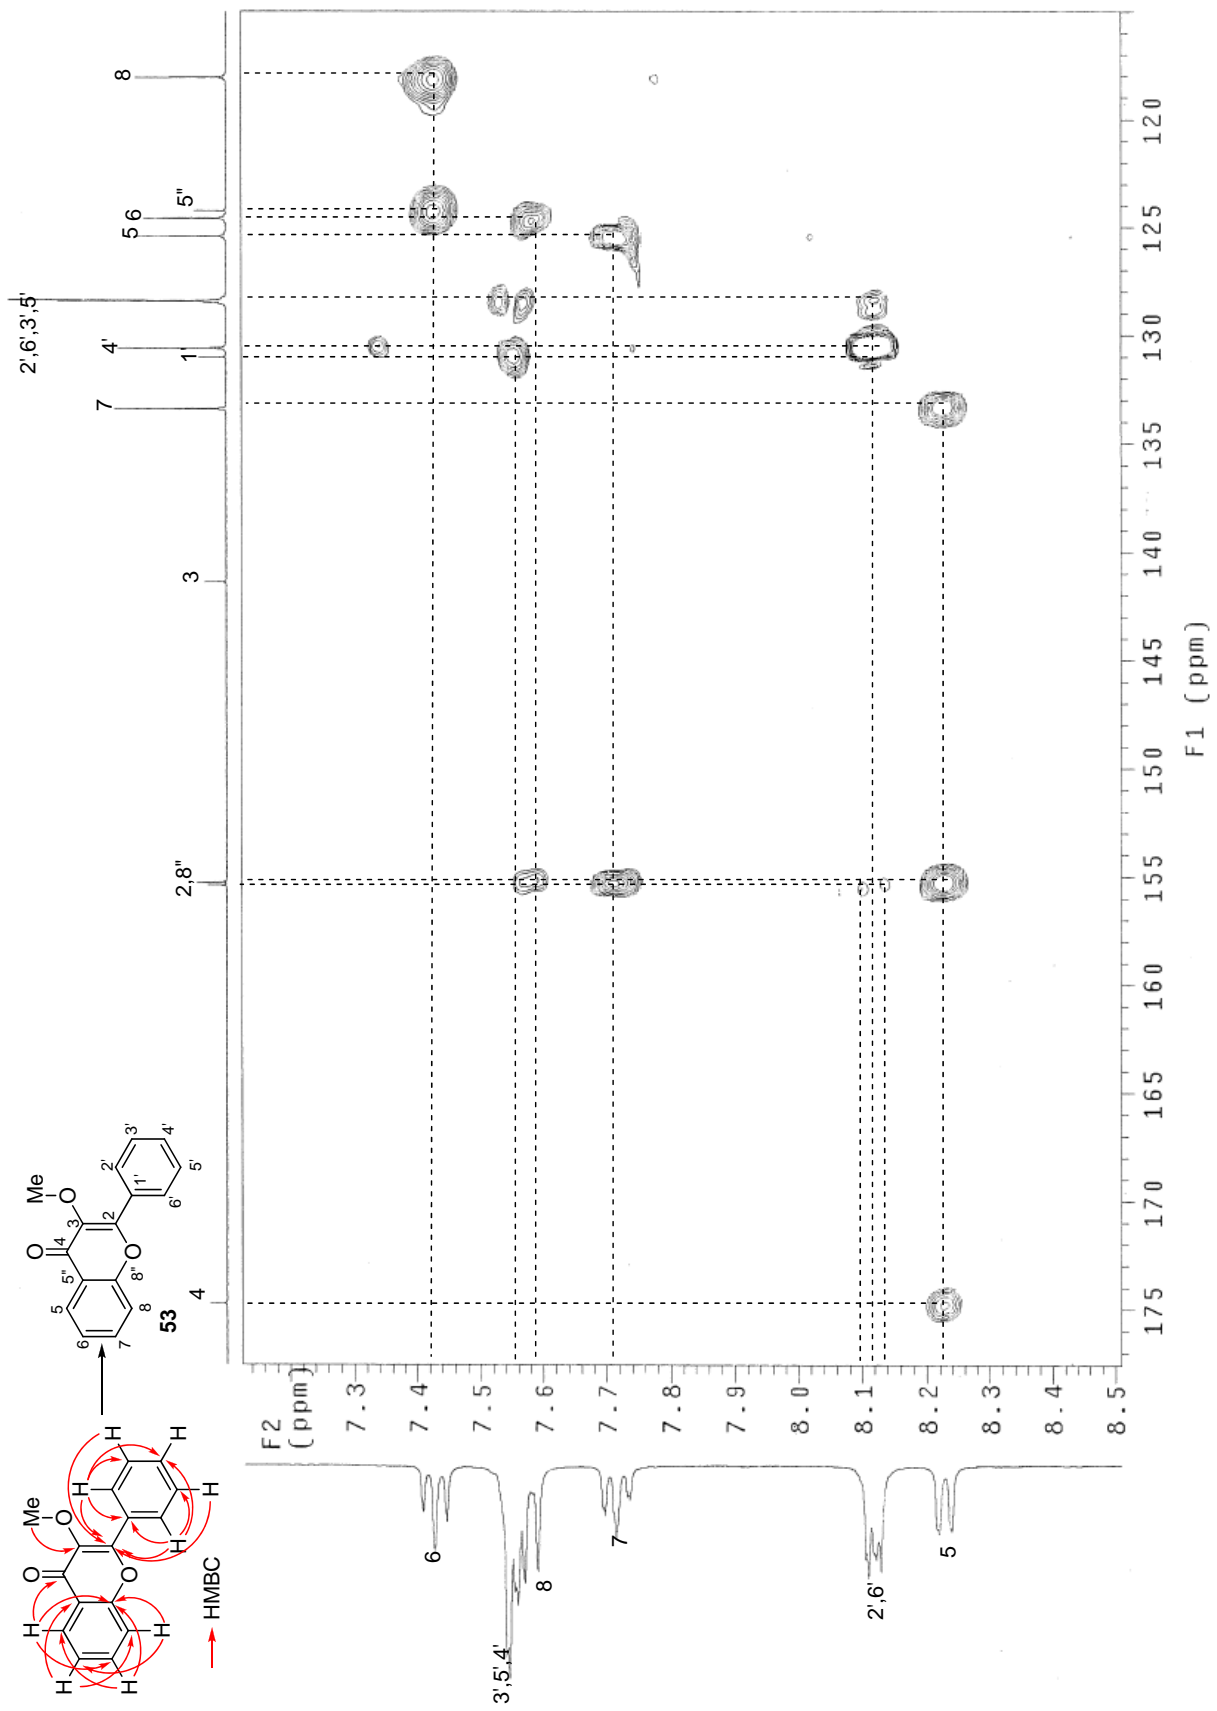

**Figure 13.** Proton NMR spectrum for **51** (400 MHz, CD<sub>2</sub>Cl<sub>2</sub>)<sup>S8</sup>

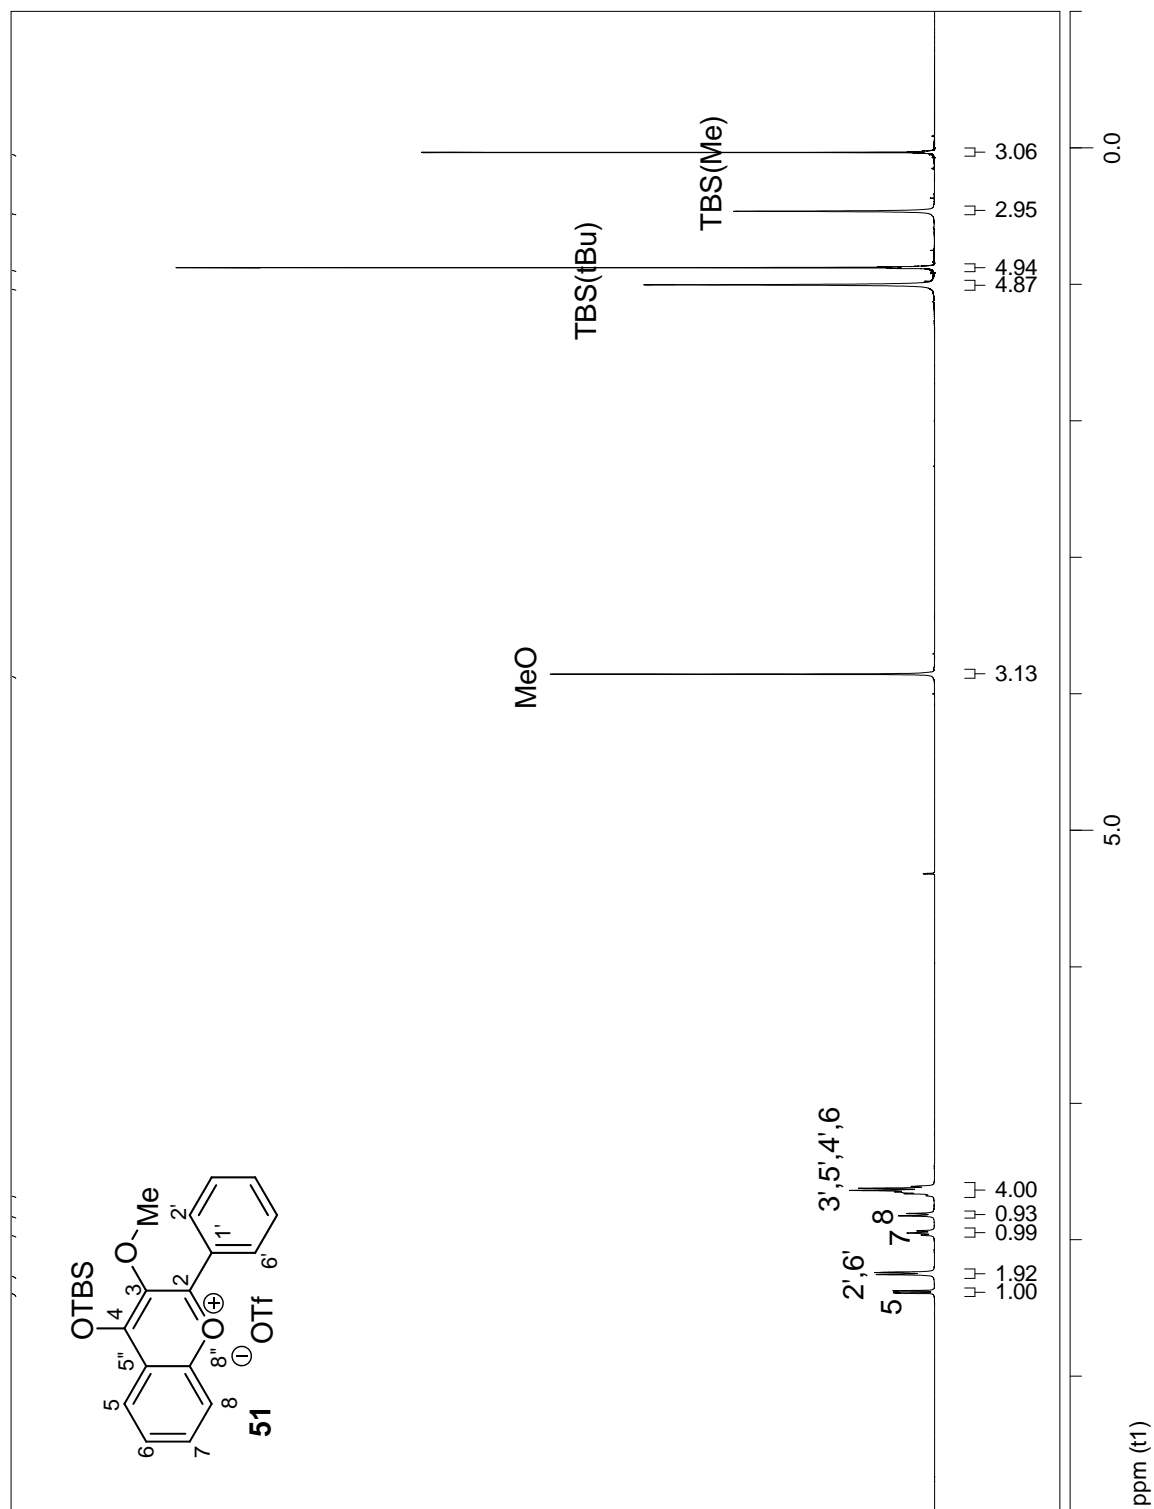

<sup>S8</sup> For example of diastereotopic TBS group, see Evans, D. A.; Allison, B. D.; Yang, M. G.; Masse, C. E. *J. Am. Chem. Soc.* **2001**, *123*, 10840-10852.

**Figure 14.** Carbon NMR spectrum for **51** (400 MHz, CD<sub>2</sub>Cl<sub>2</sub>)

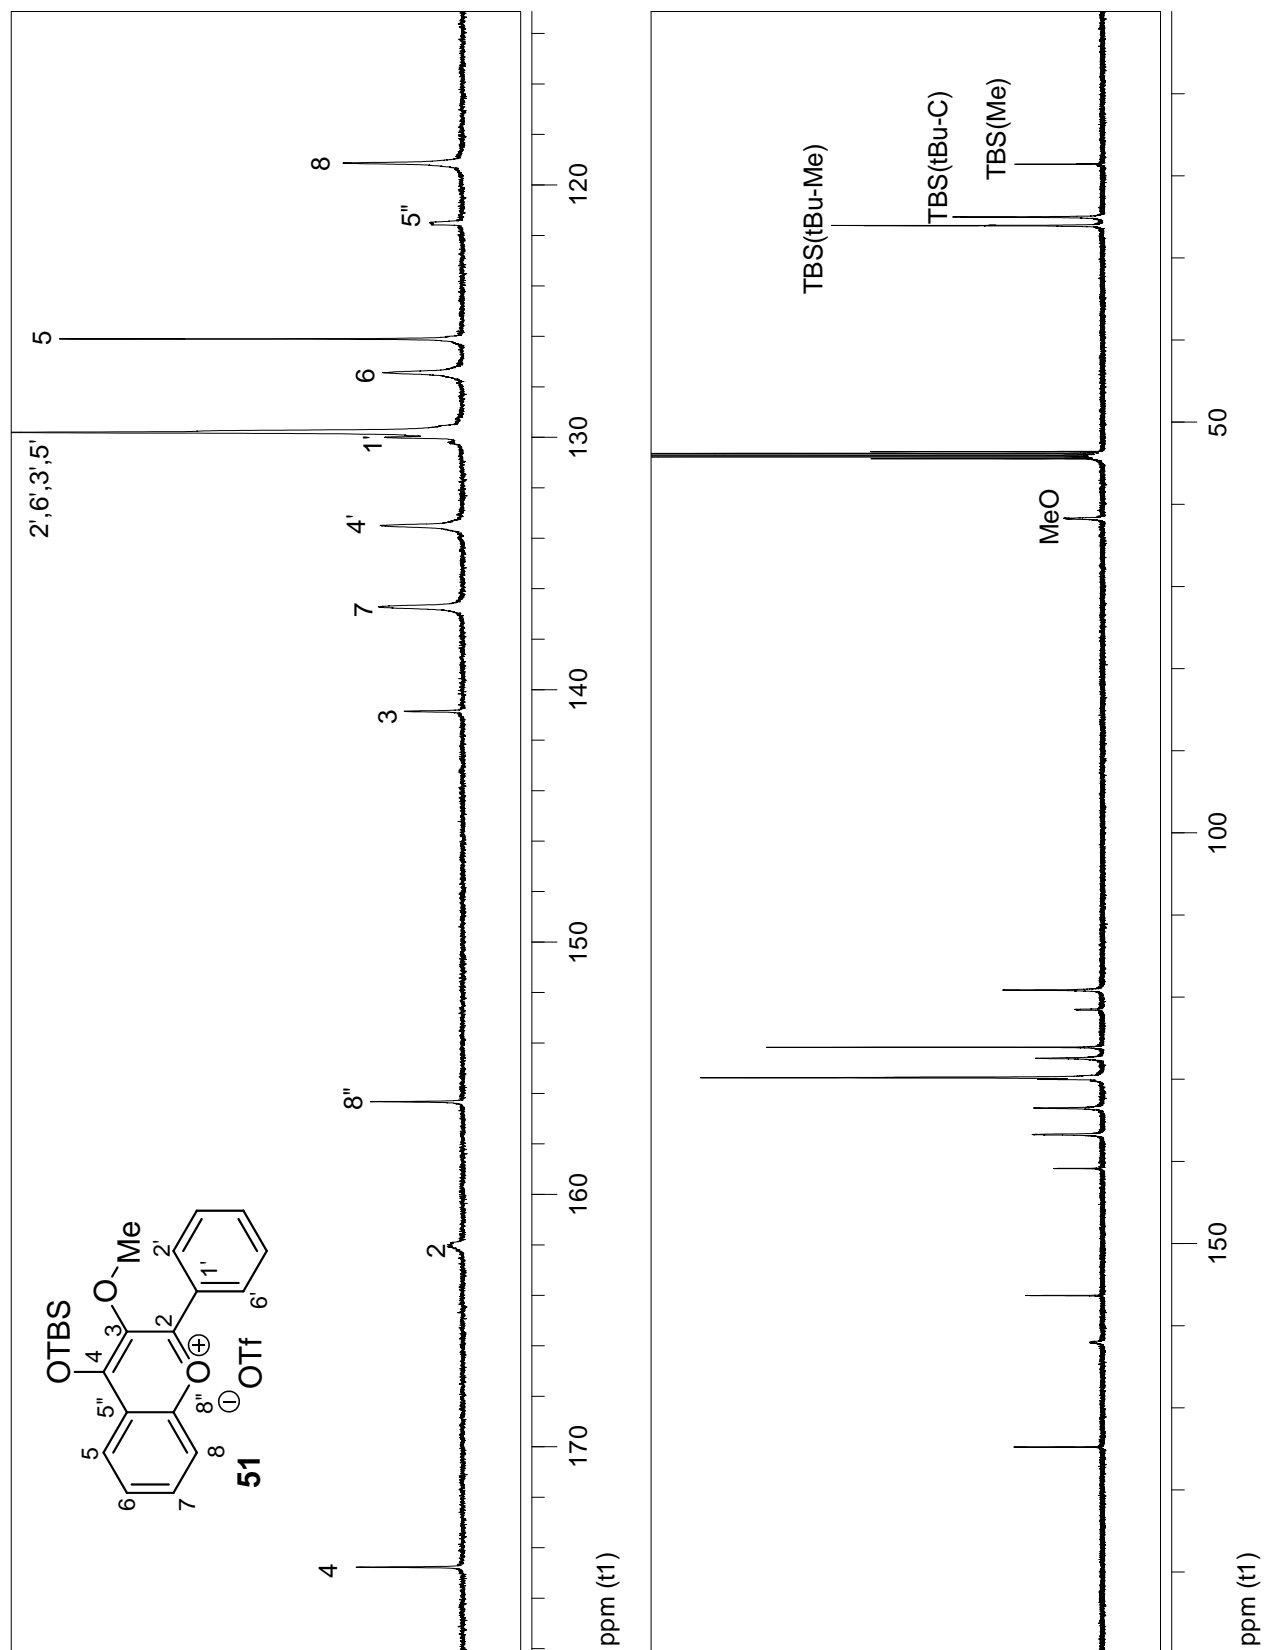

**Figure 15.** gCOSY NMR spectrum for **51** (500 MHz, CD<sub>2</sub>Cl<sub>2</sub>)

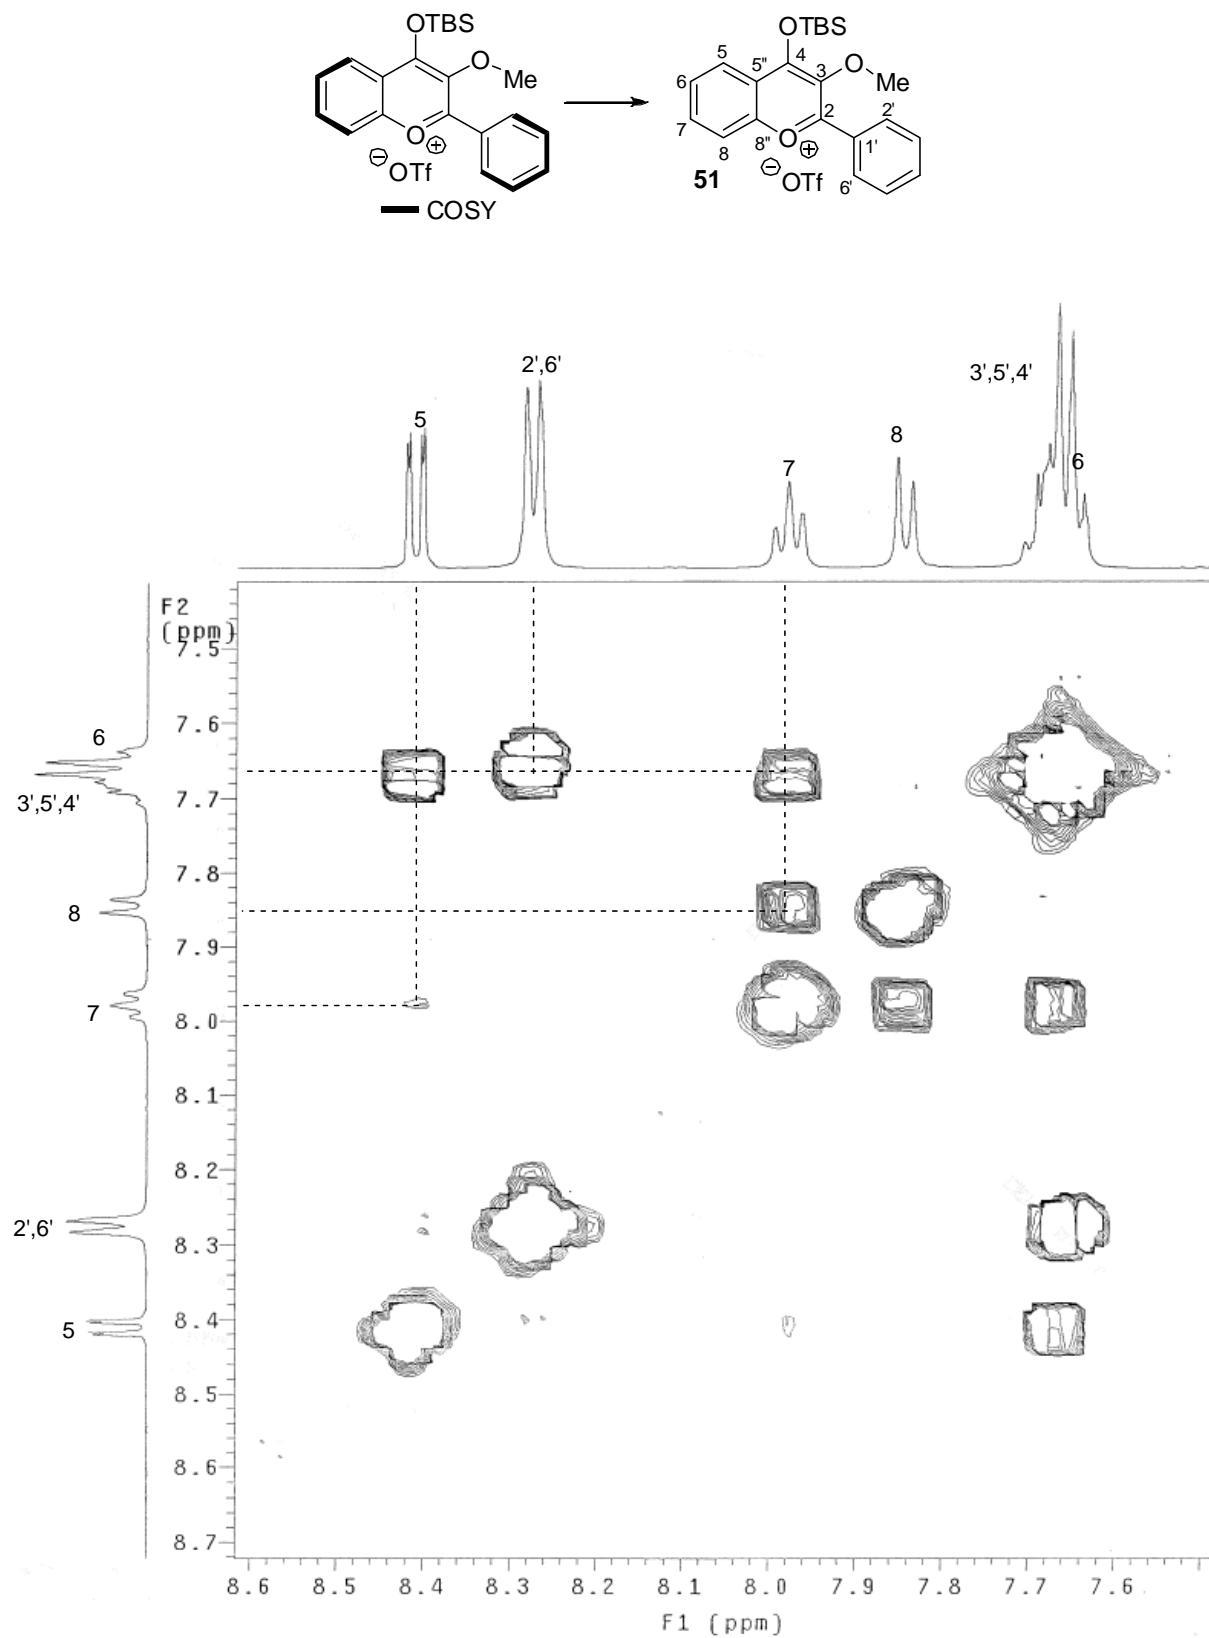

Figure 16. gHSQC NMR spectrum for **51** (500 MHz, CD<sub>2</sub>Cl<sub>2</sub>)

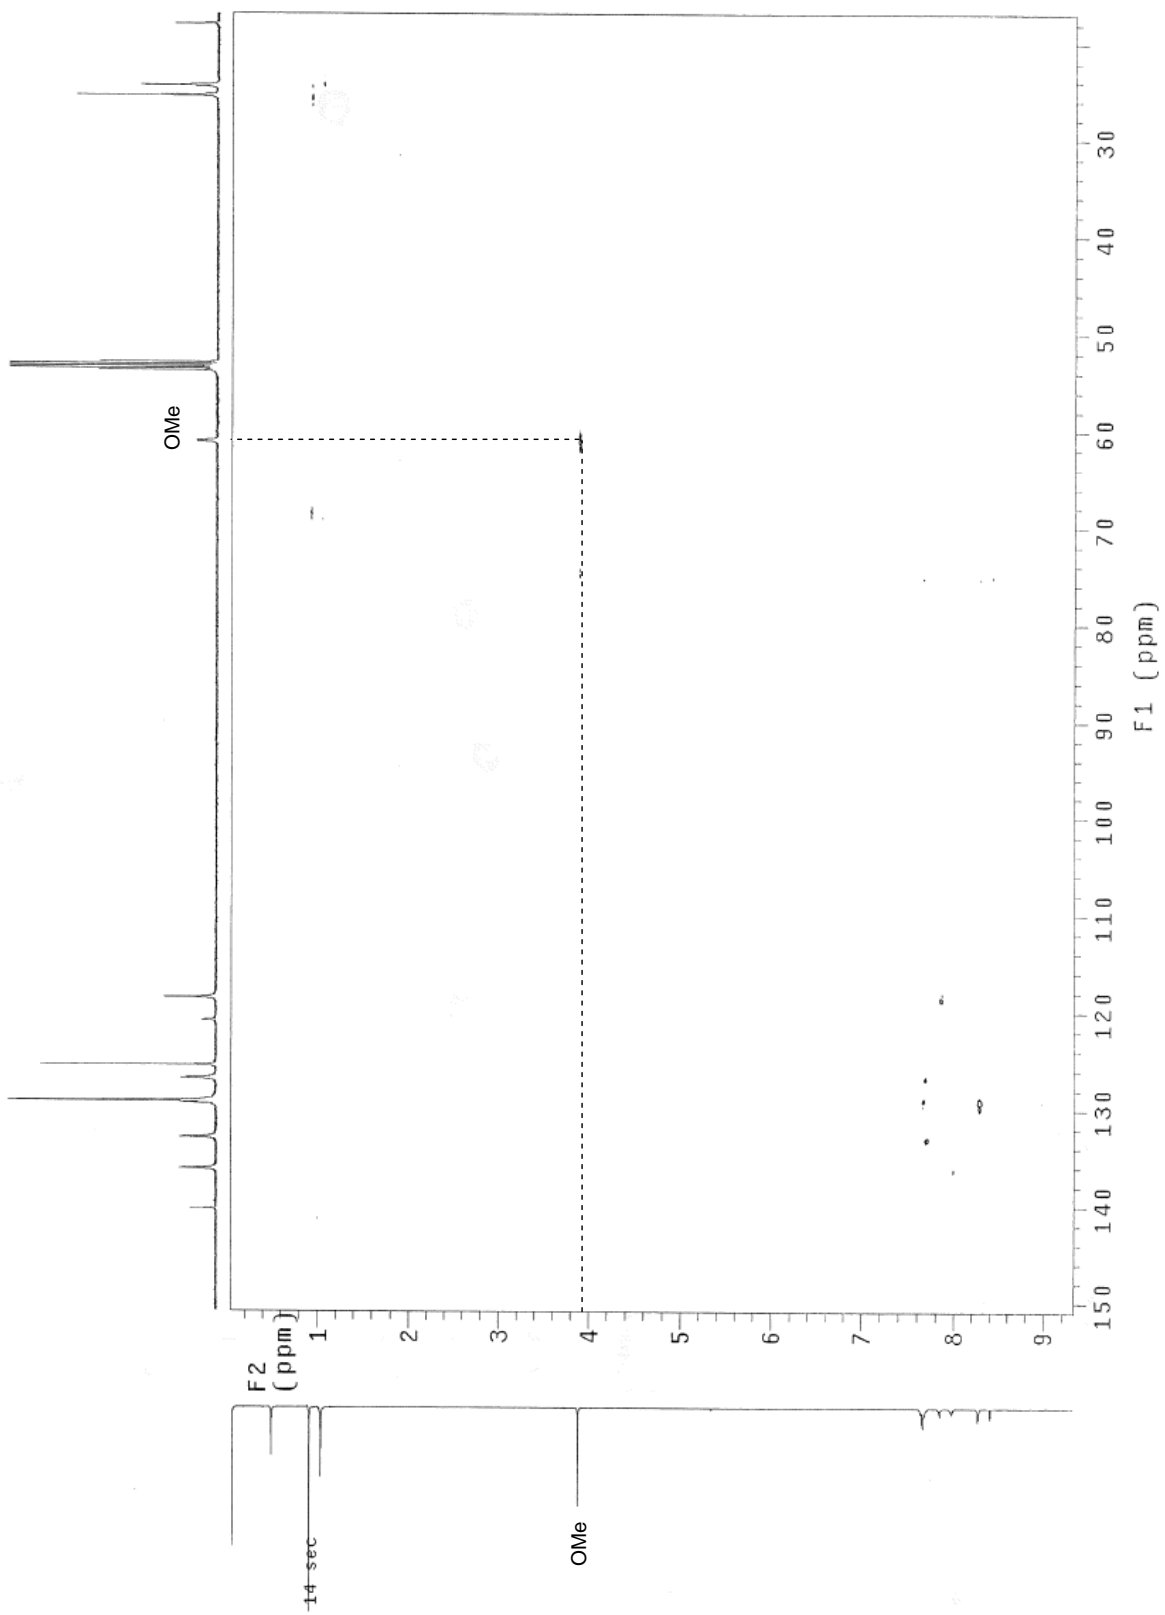

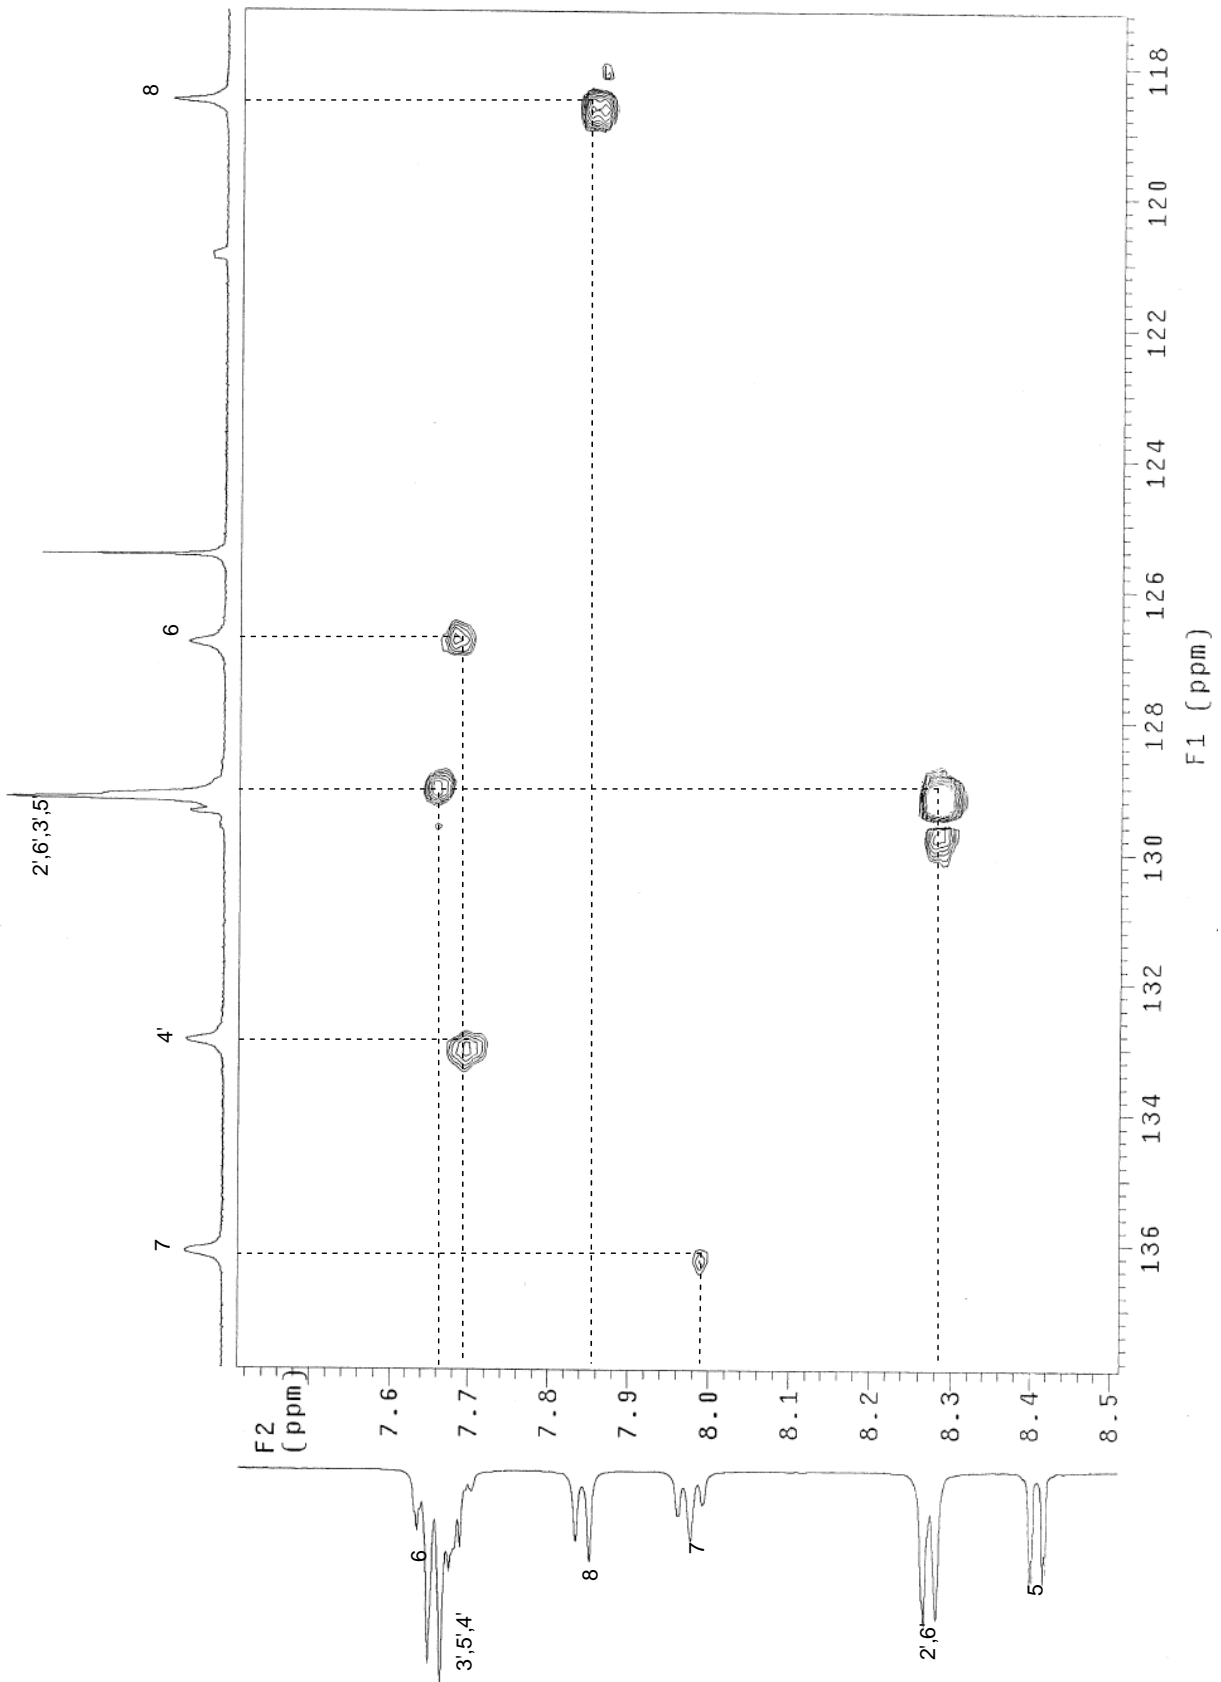

**Figure 17.** gHMBC NMR spectrum for **51** (500 MHz, CD<sub>2</sub>Cl<sub>2</sub>)

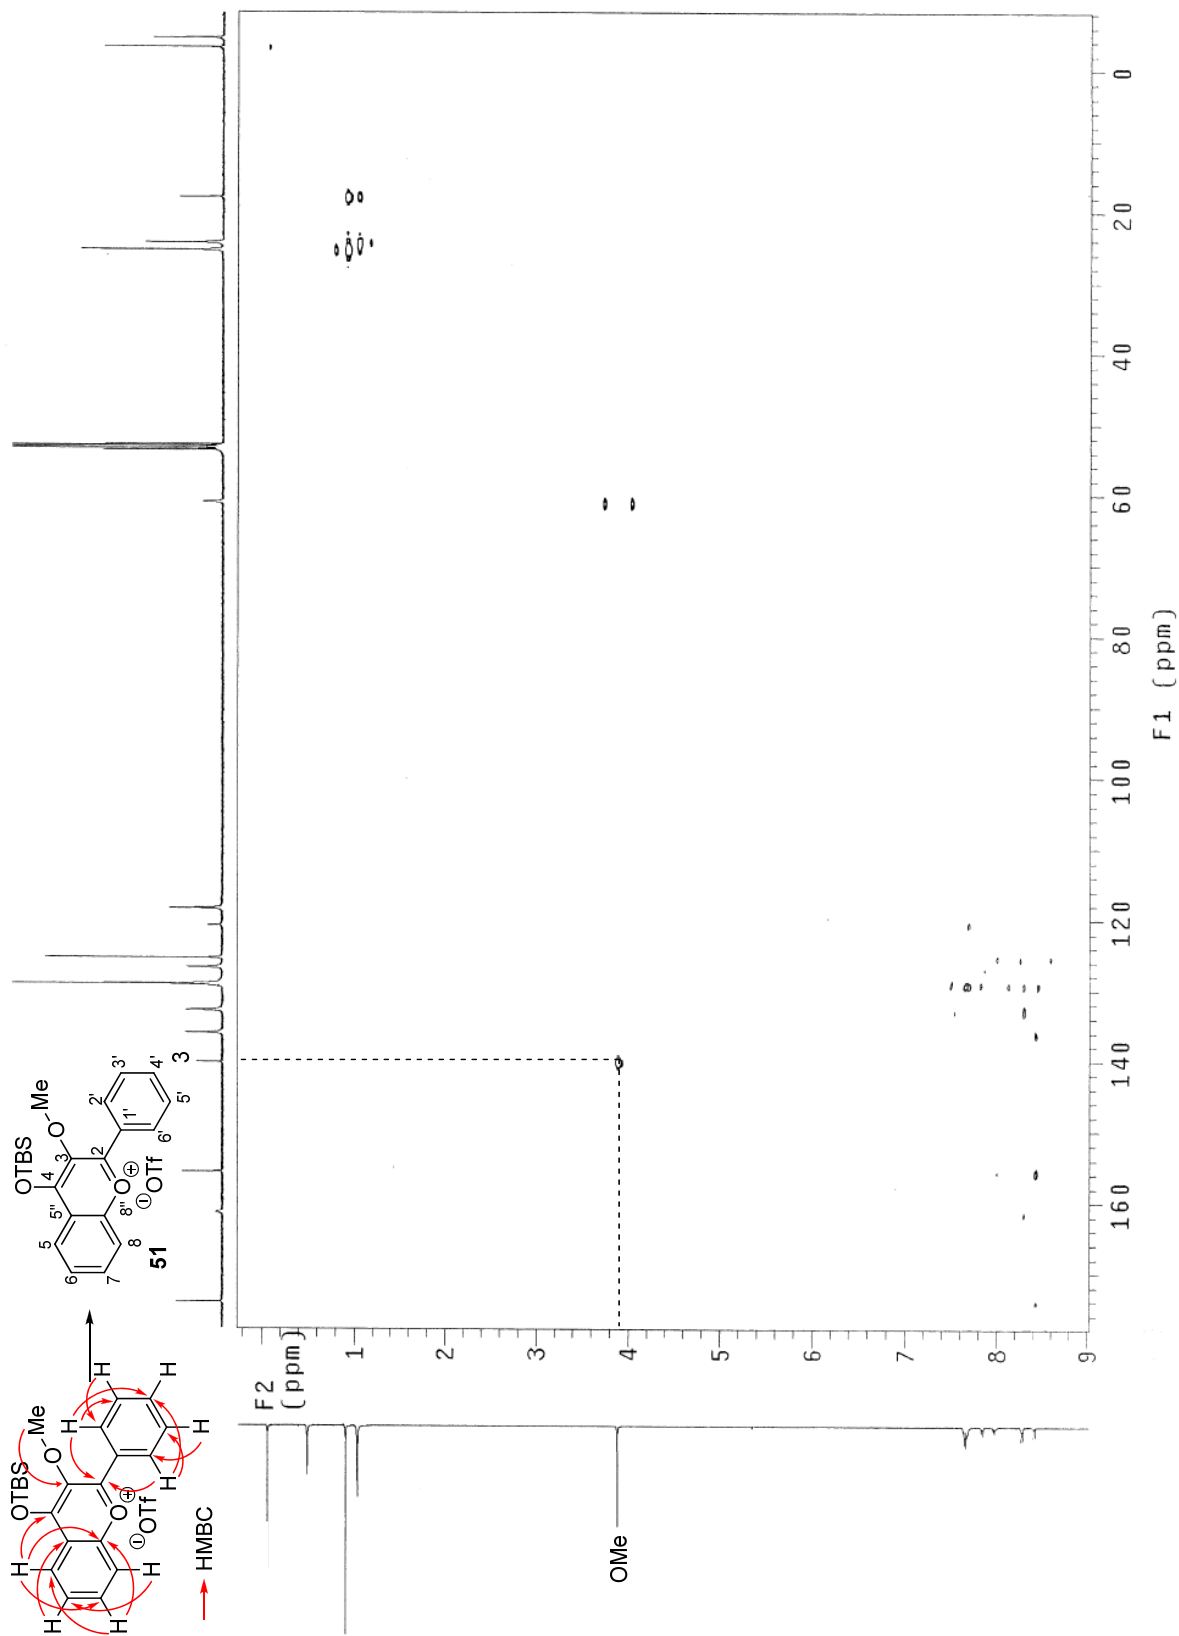



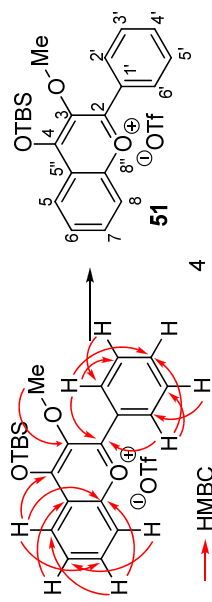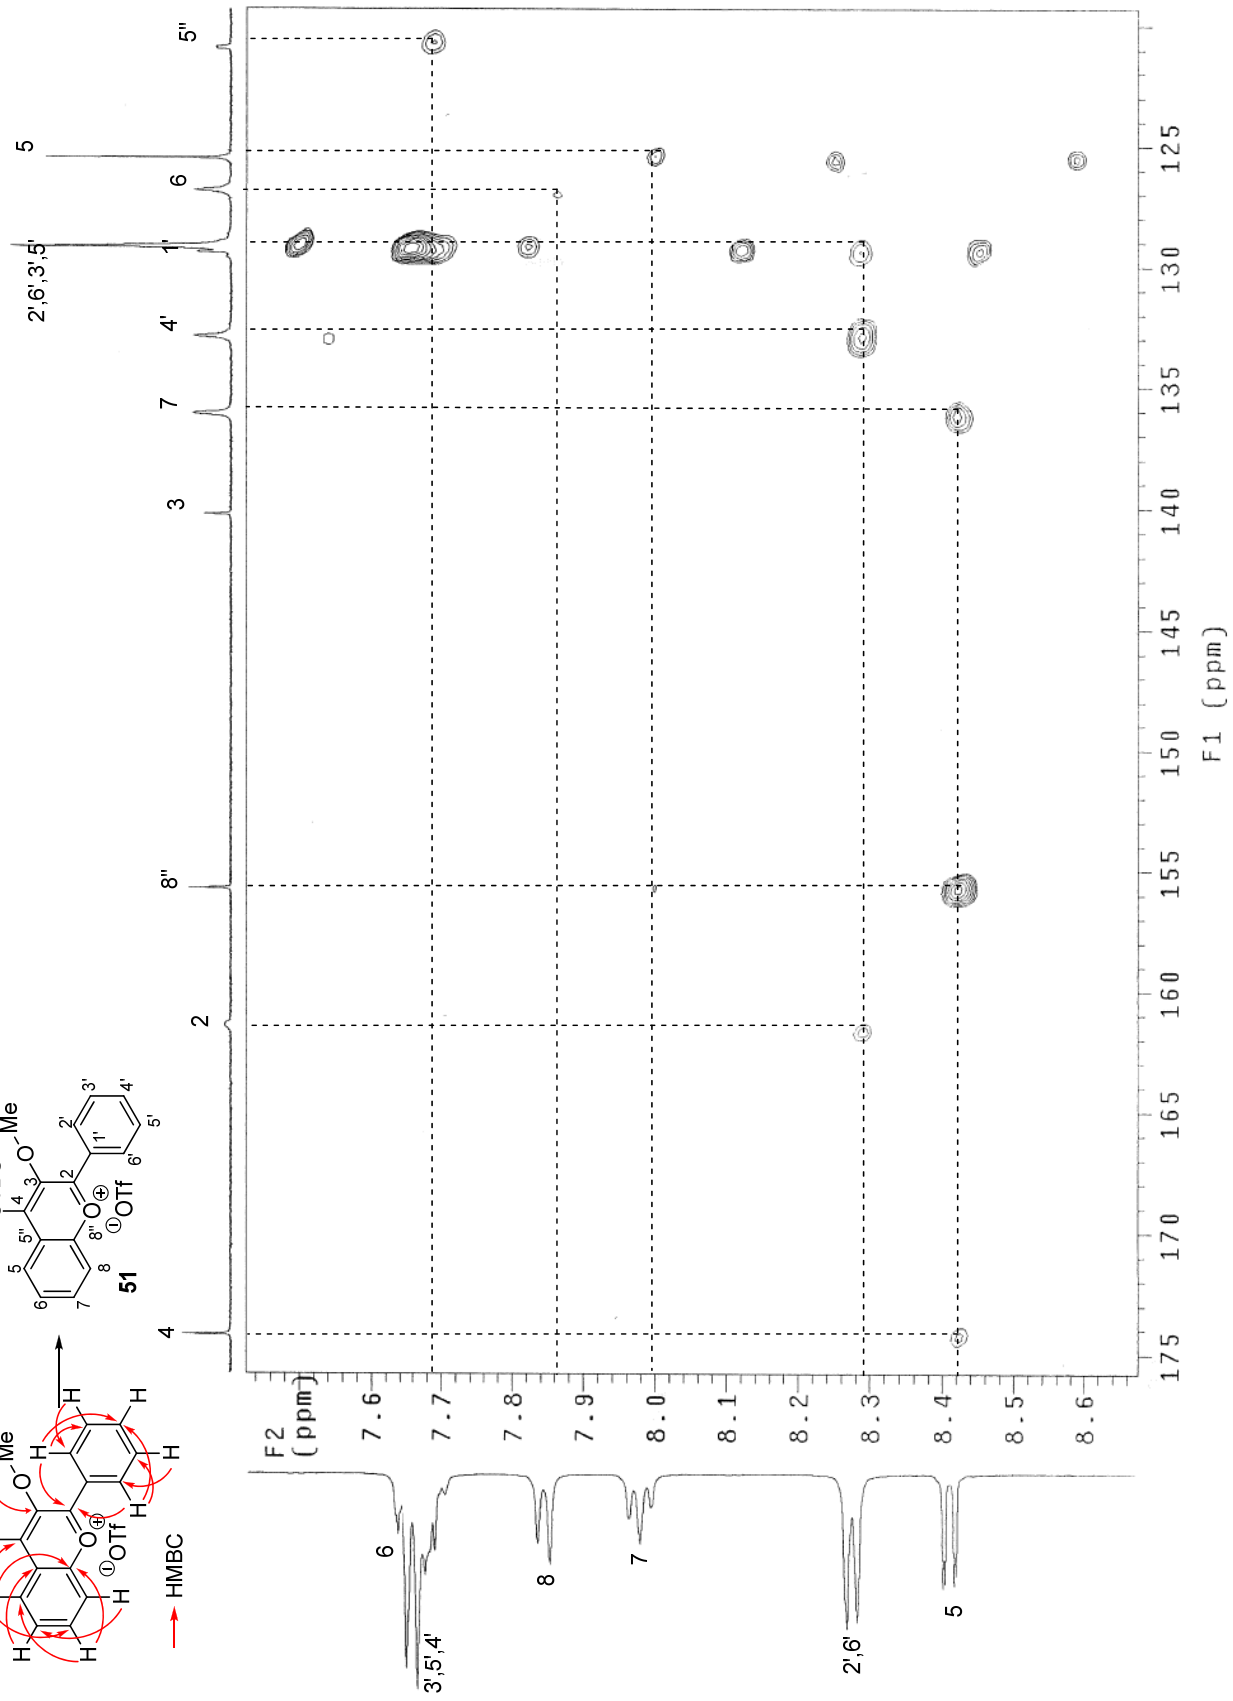

**Figure 18.** Proton NMR spectrum for **52** (400 MHz, CD<sub>2</sub>Cl<sub>2</sub>)

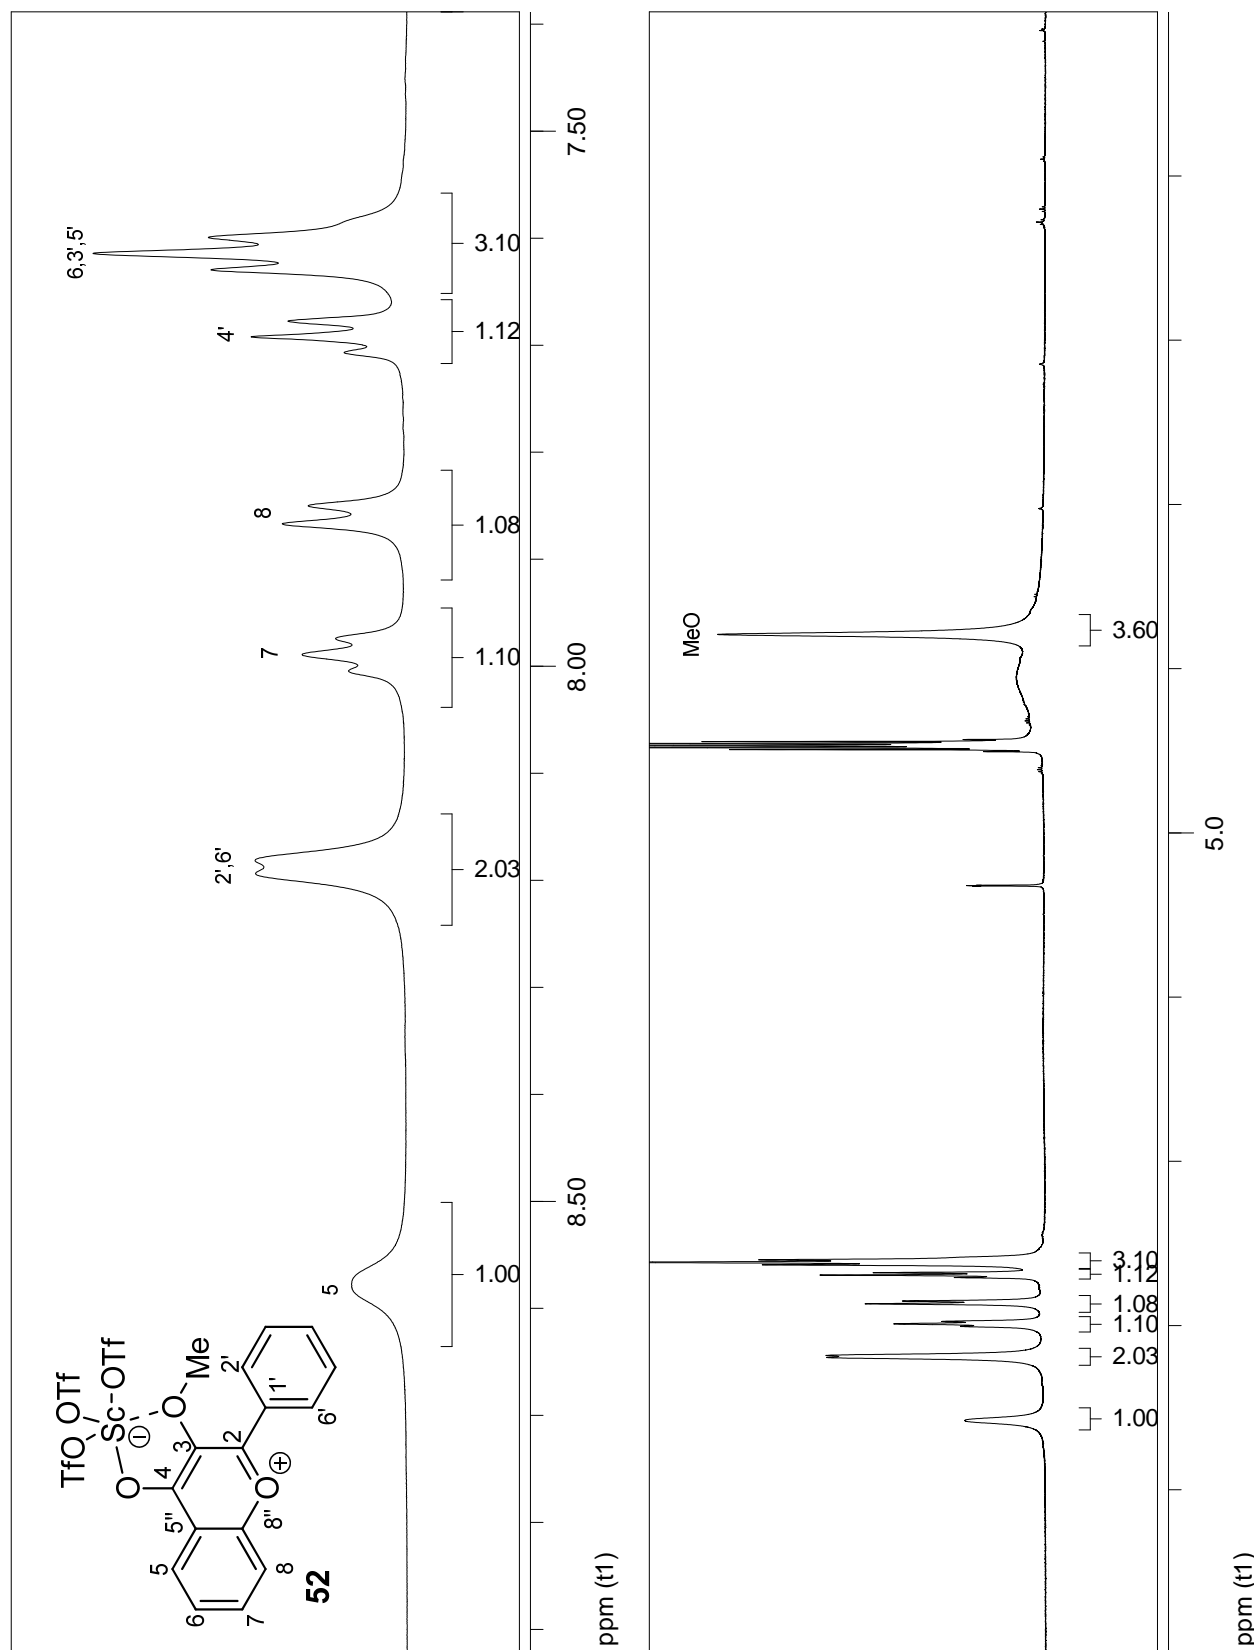

**Figure 19.** Carbon NMR spectrum for **52** (400 MHz, CD<sub>2</sub>Cl<sub>2</sub>)

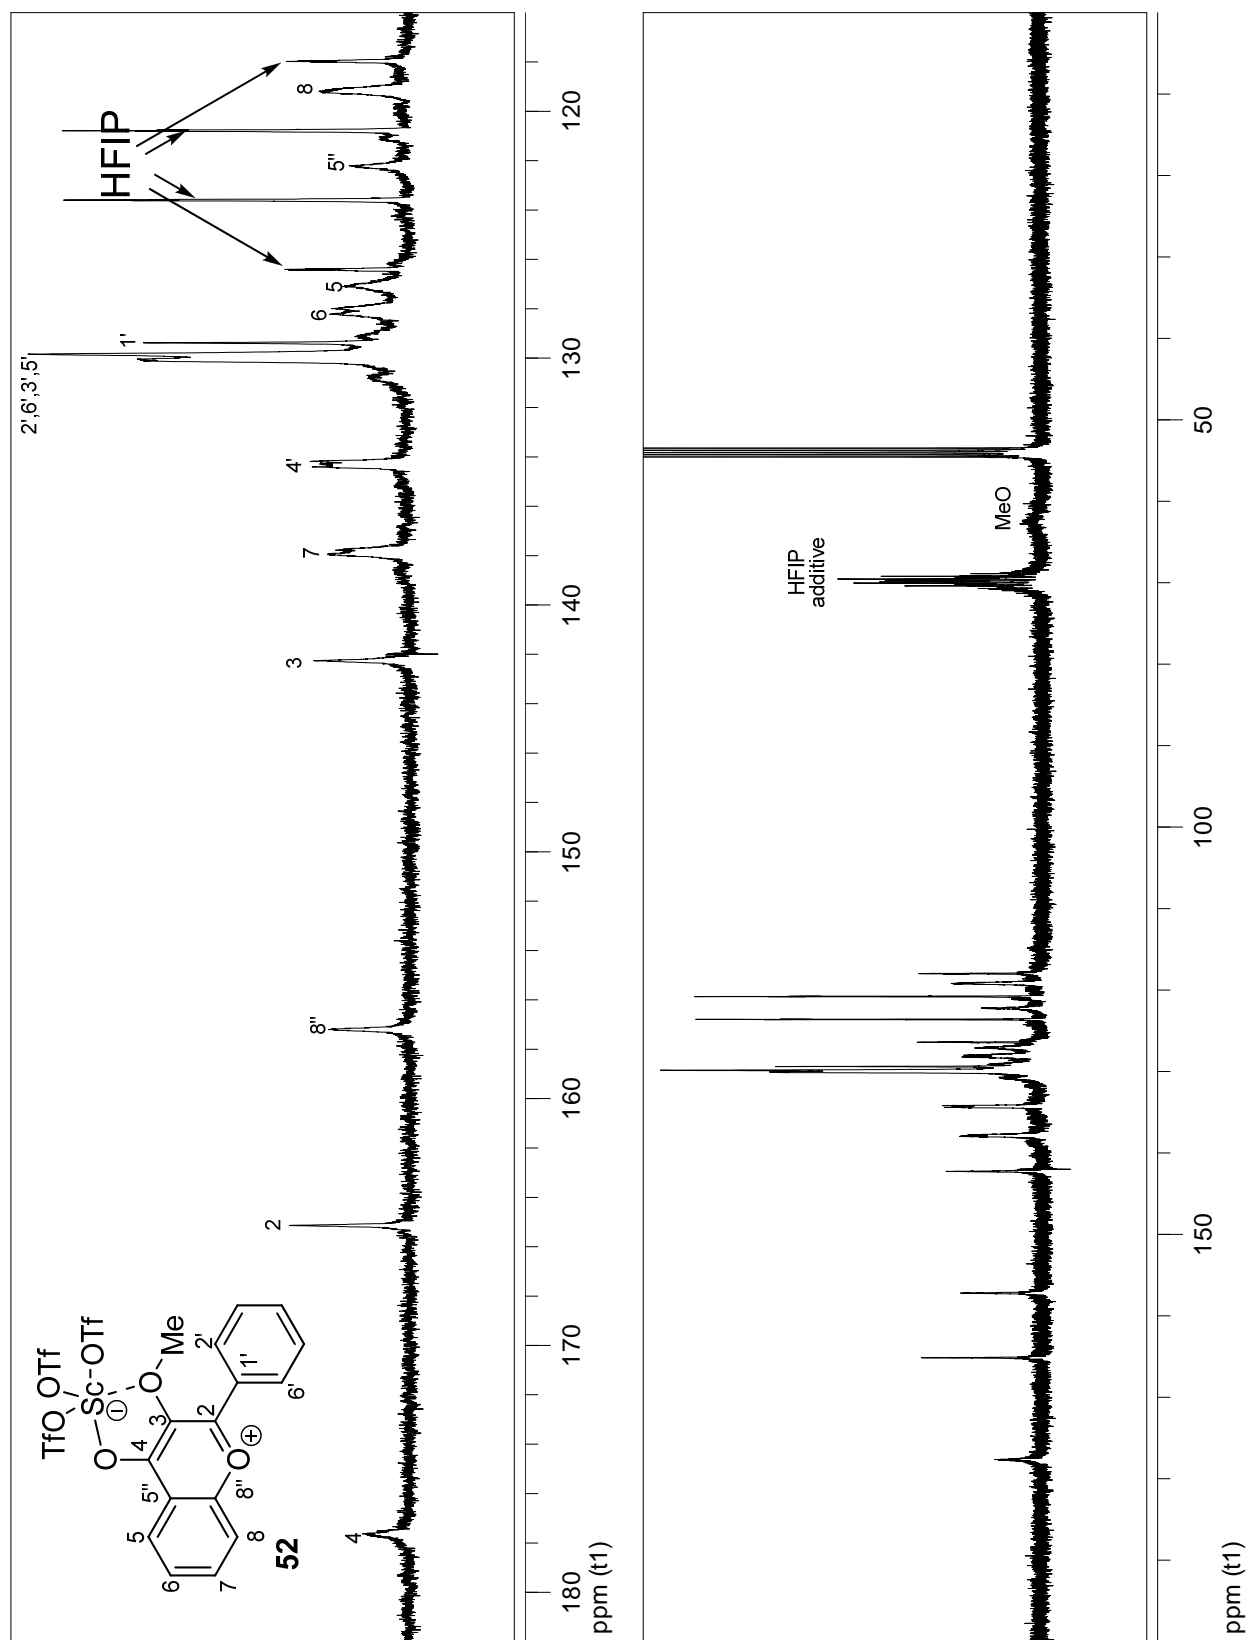

**Figure 20.** gCOSY NMR spectrum for **52** (400 MHz, CD<sub>2</sub>Cl<sub>2</sub>)

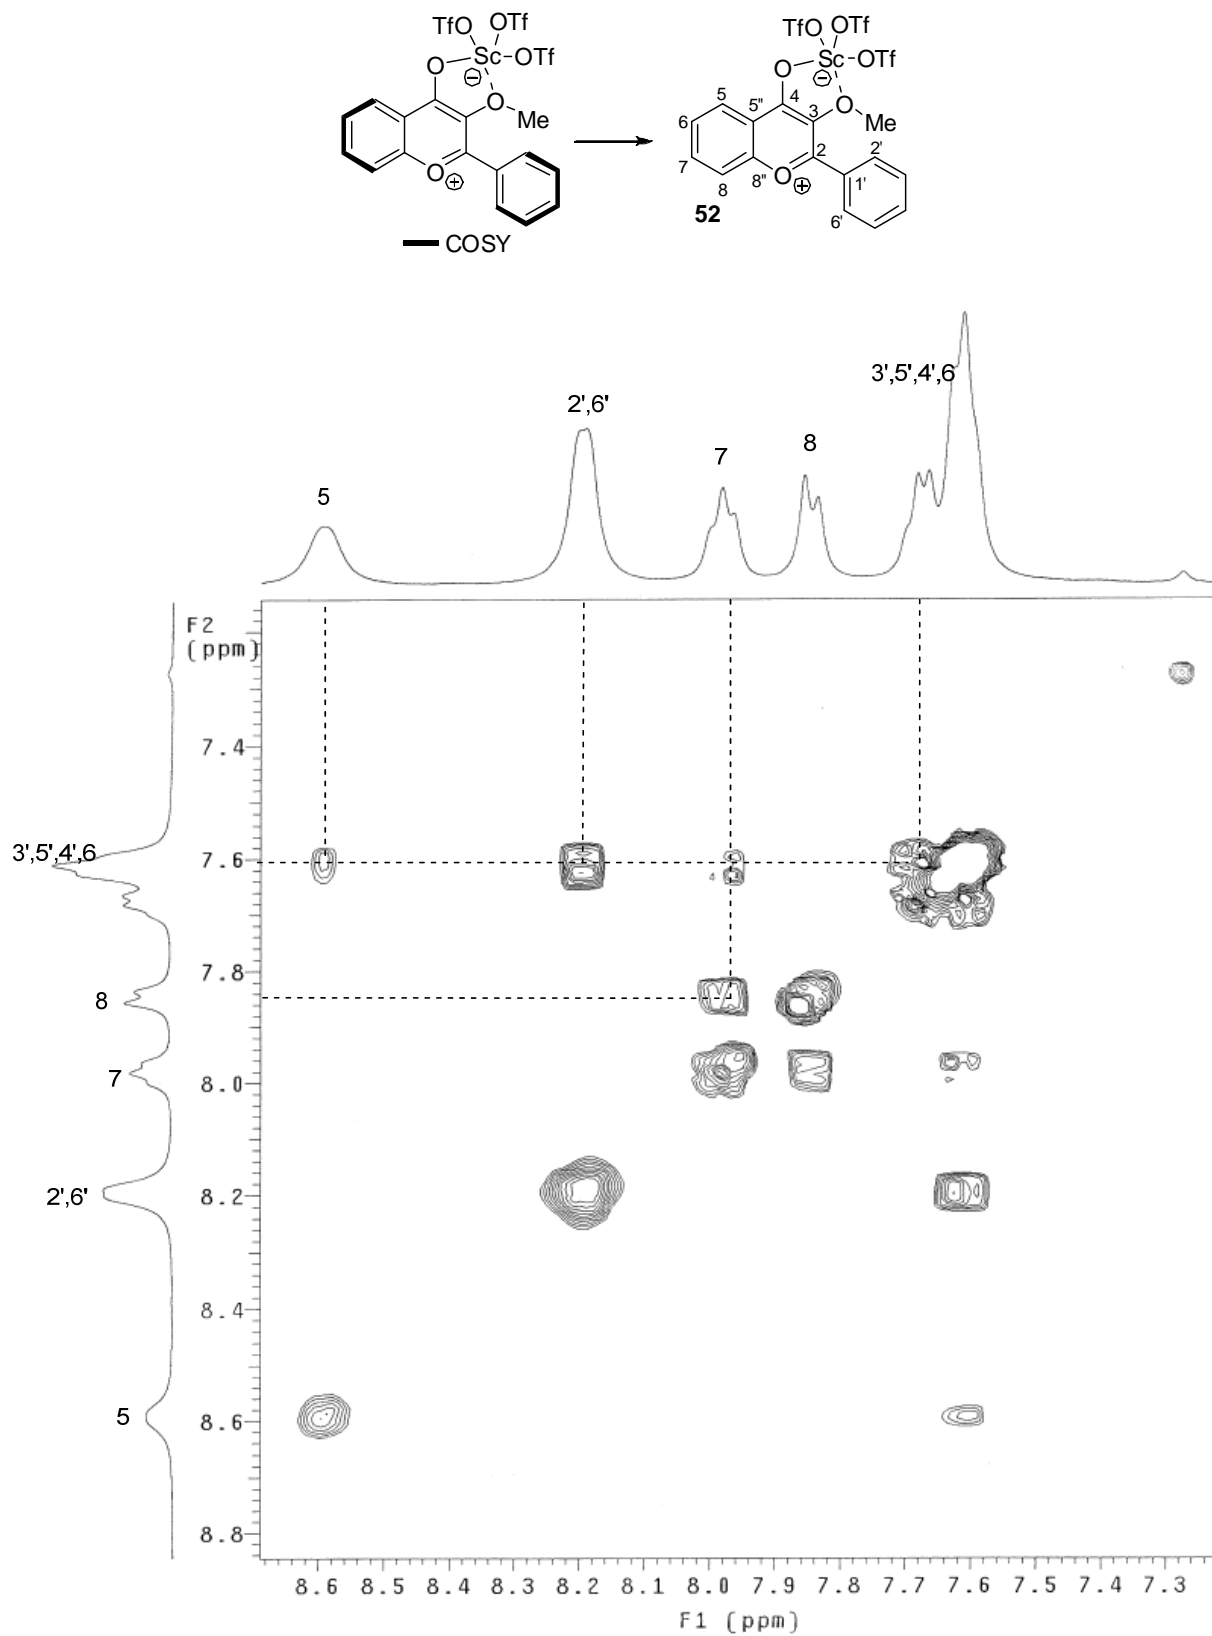

Figure 21. gHSQC NMR spectrum for **52** (400 MHz, CD<sub>2</sub>Cl<sub>2</sub>)

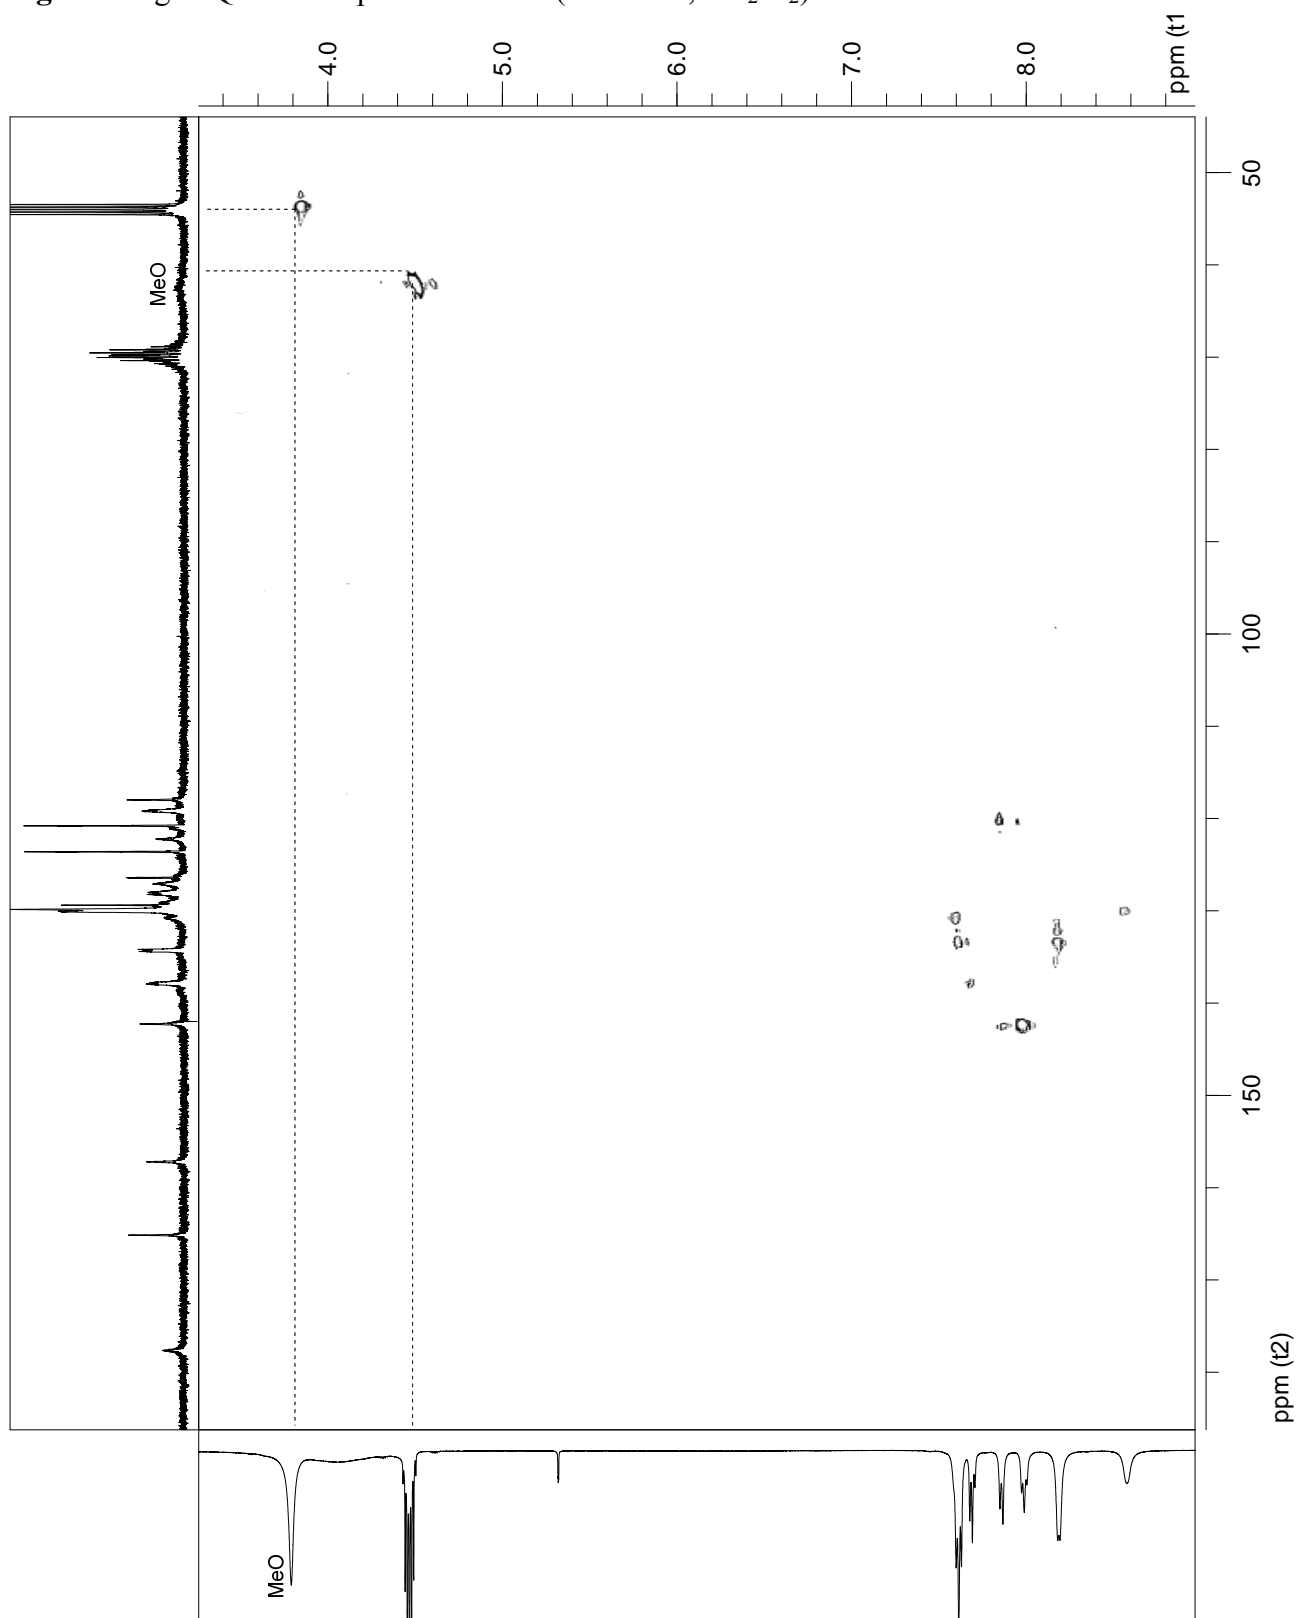

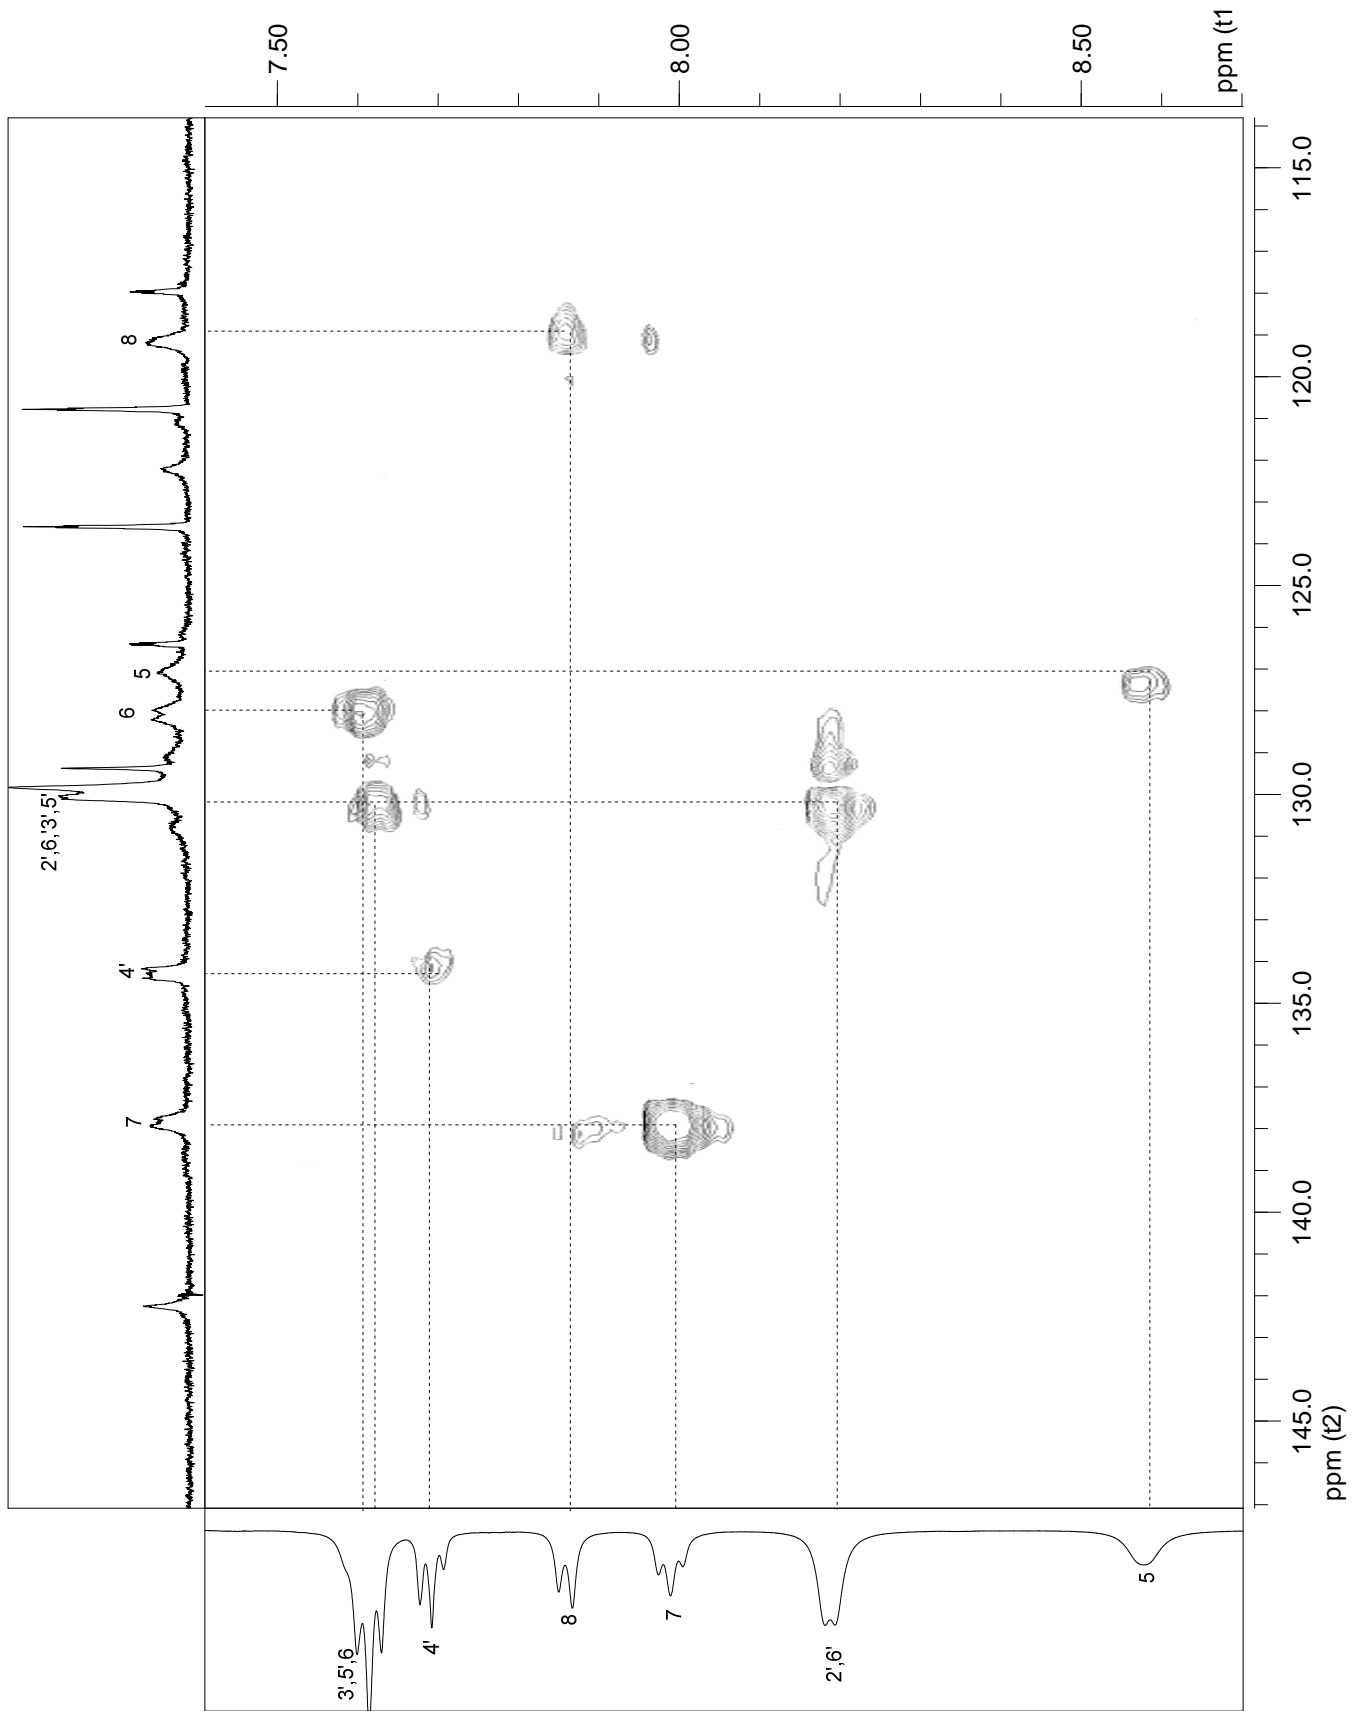

**Figure 22.** gHMBC NMR spectrum for **52** (400 MHz, CD<sub>2</sub>Cl<sub>2</sub>)

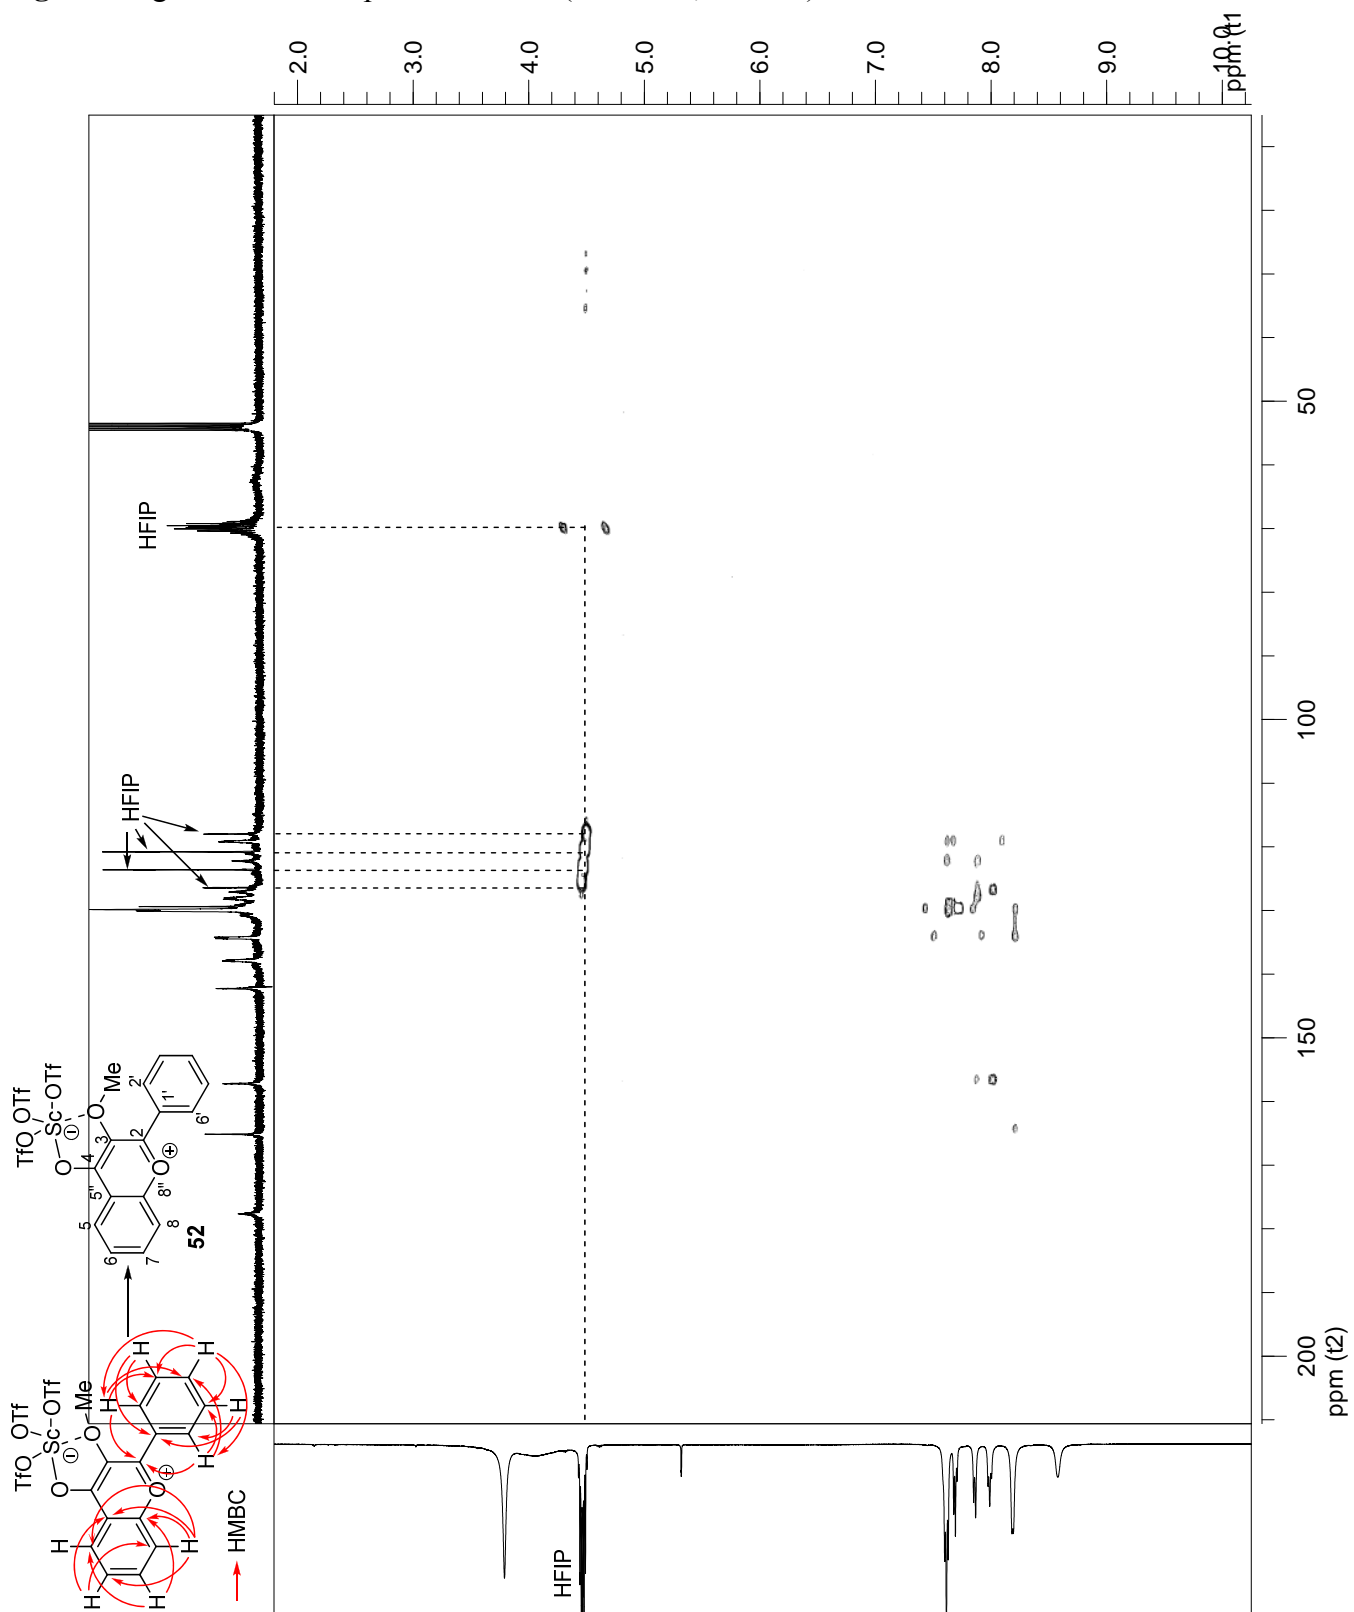

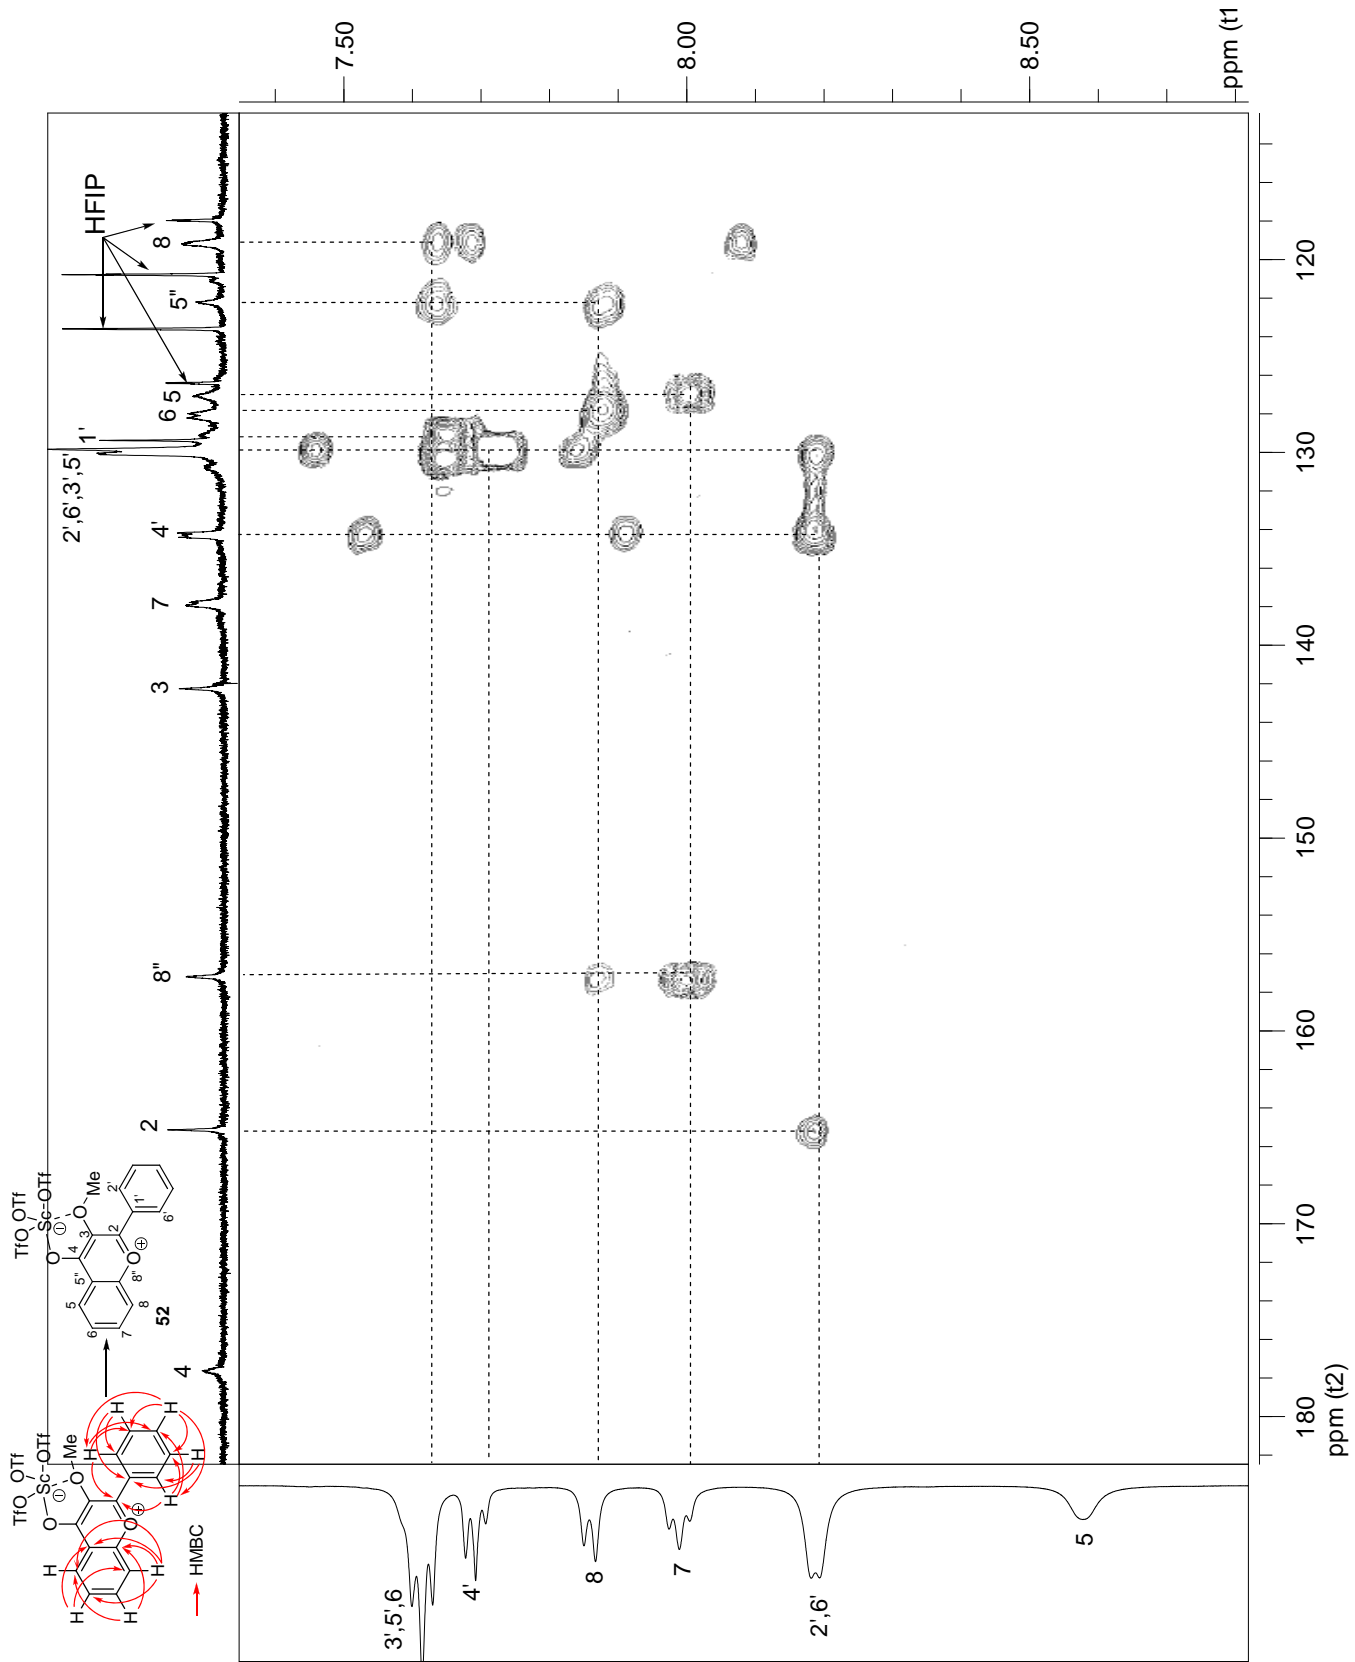



## XII. Representative Spectral Data: Chiral HPLC Traces of Select Compounds.

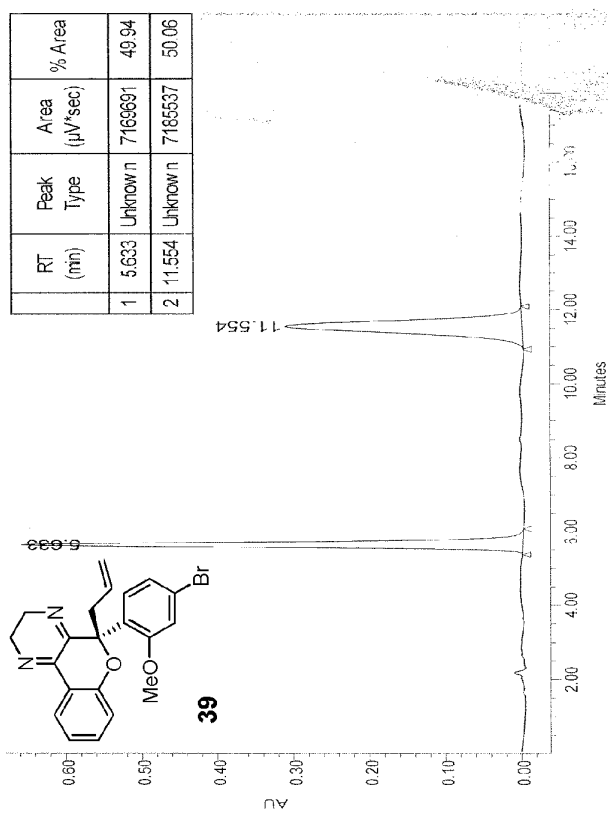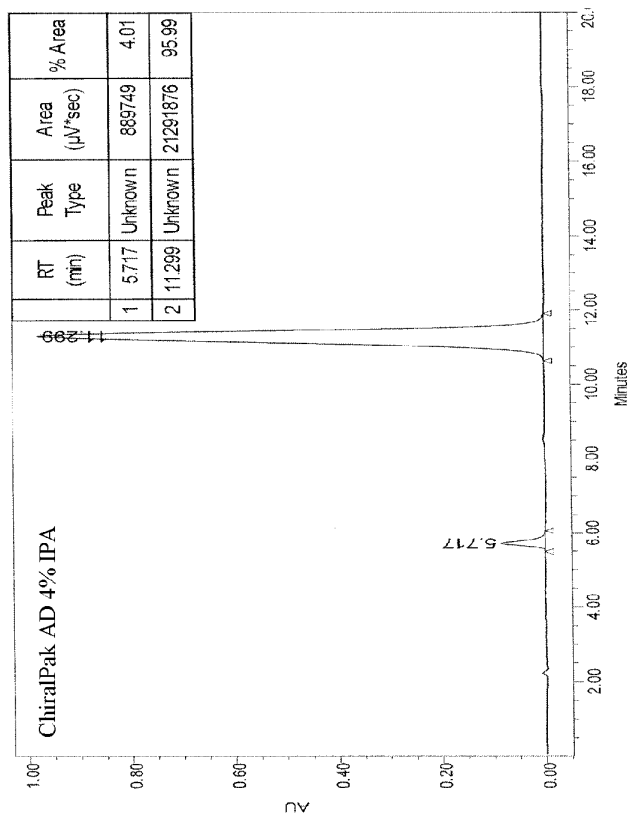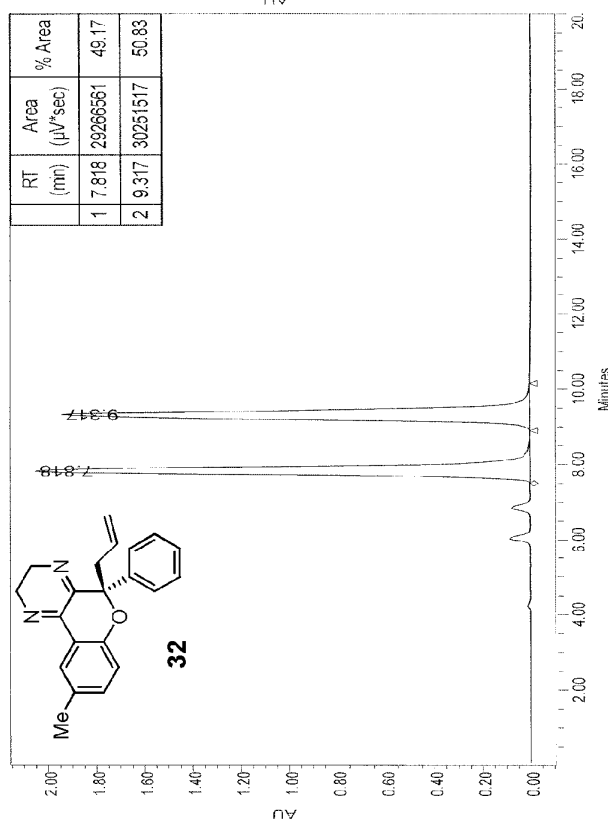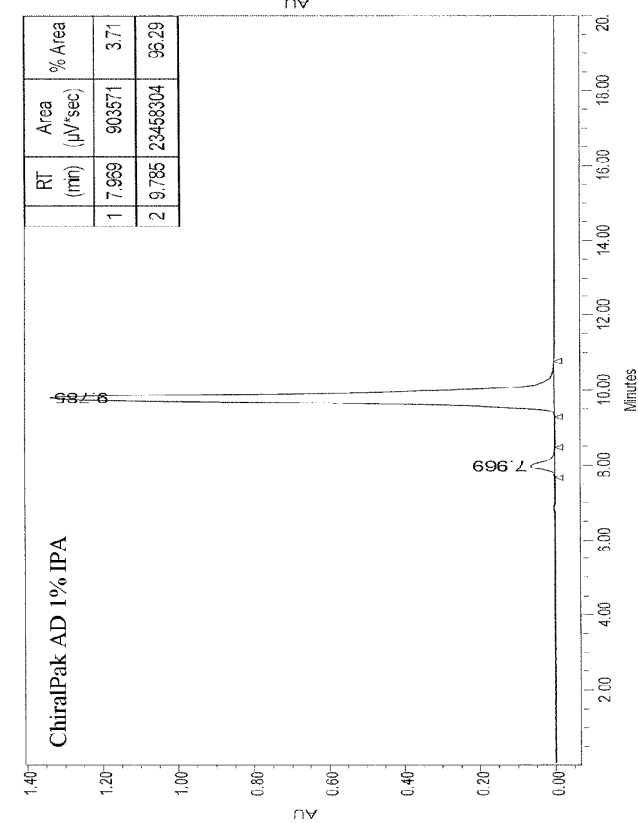

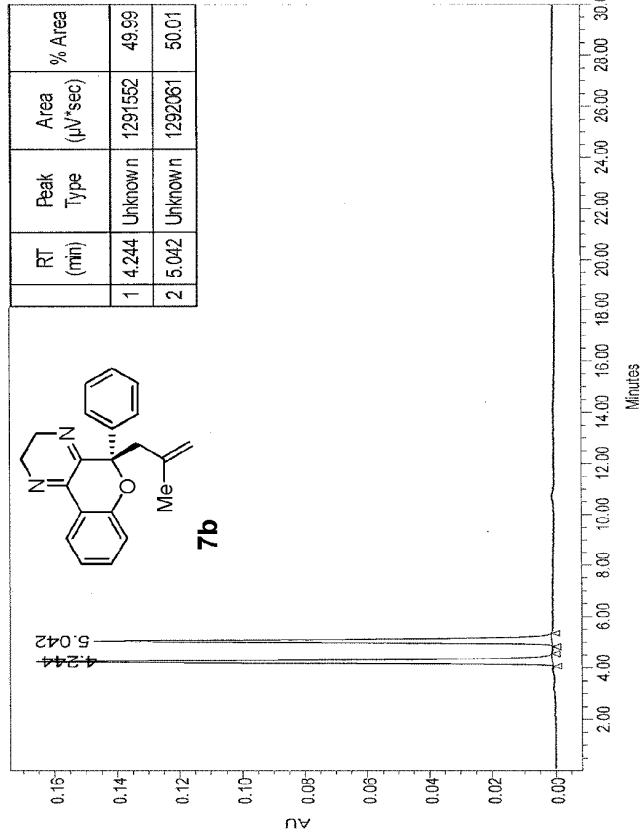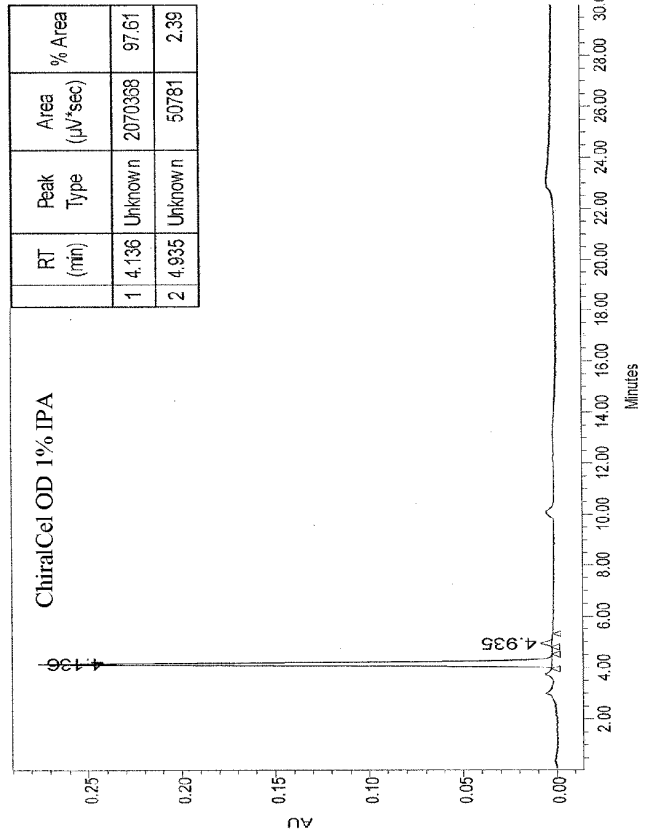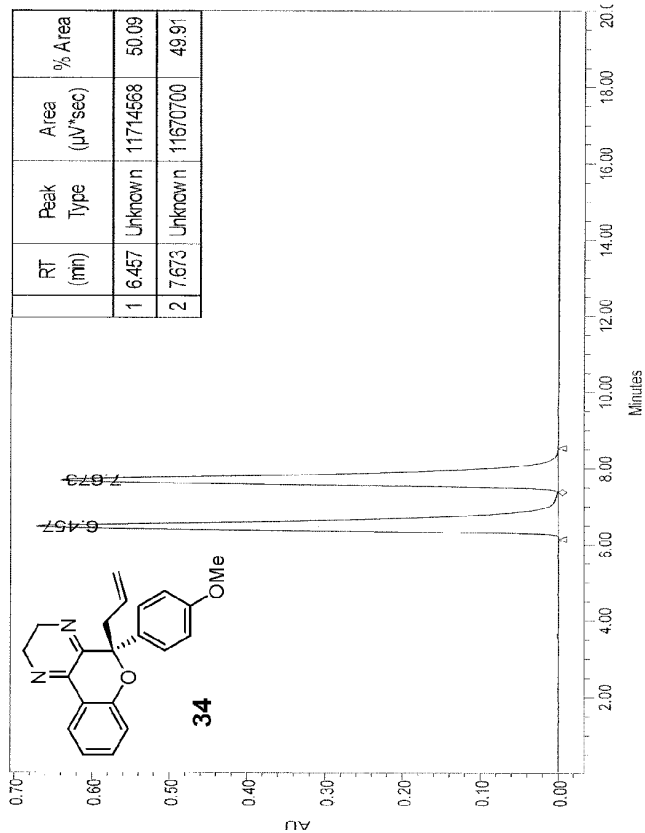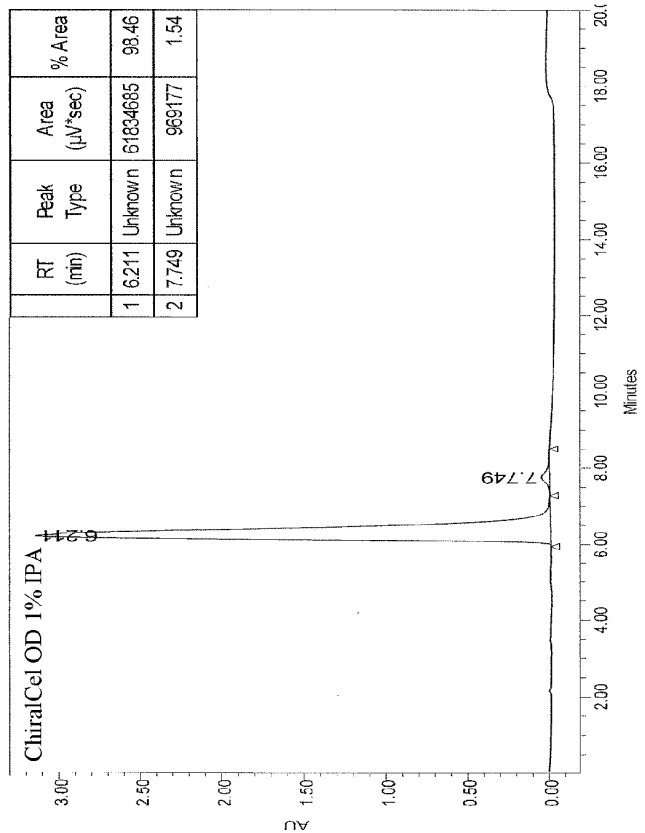

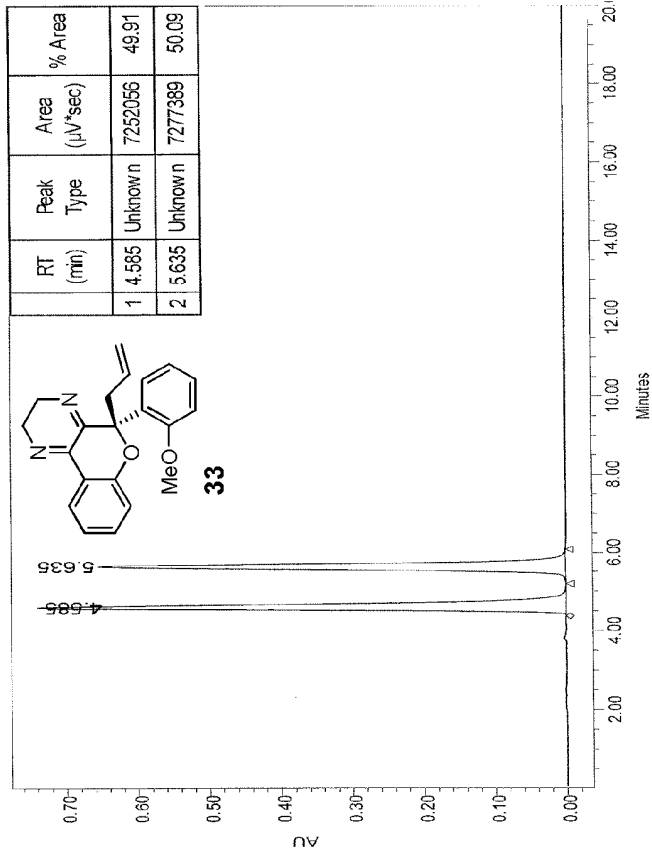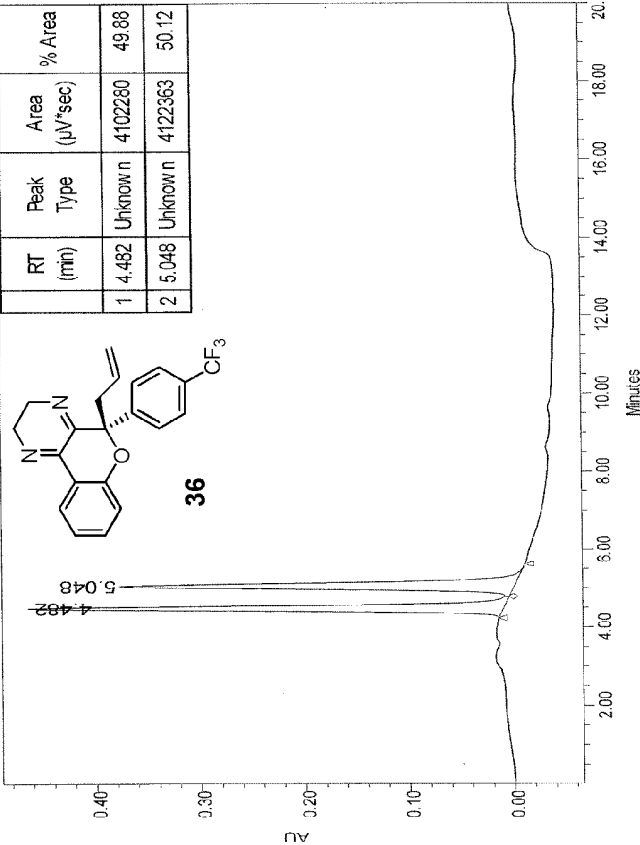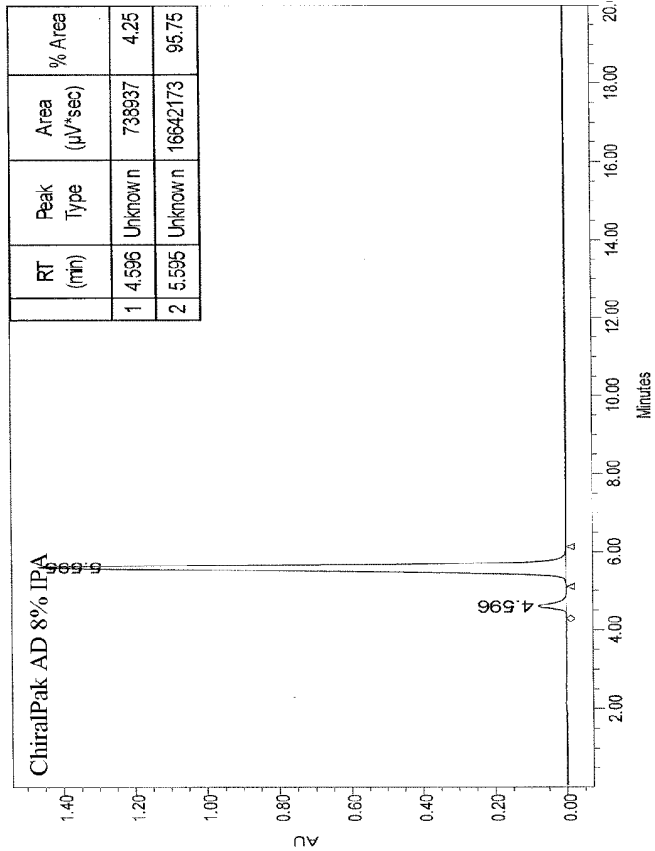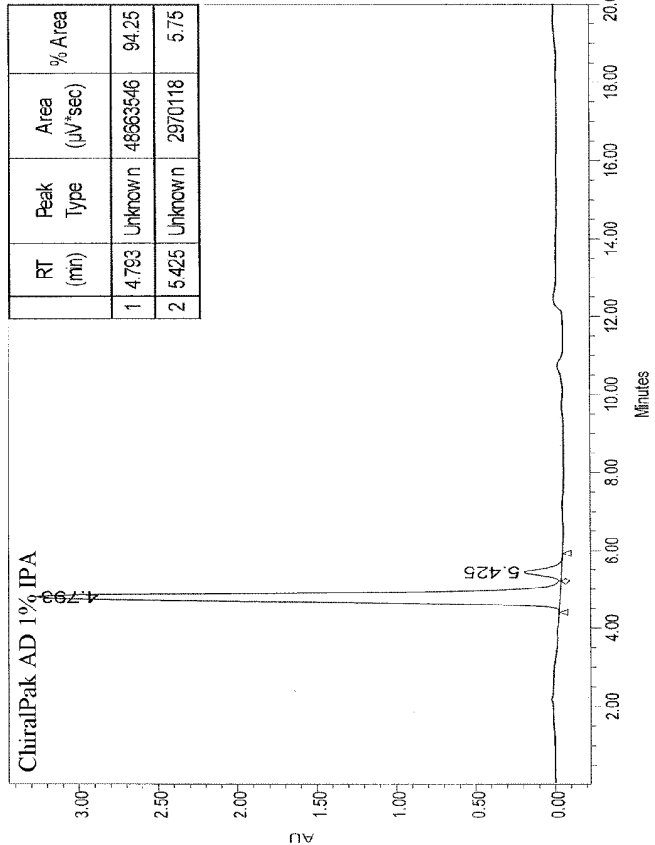

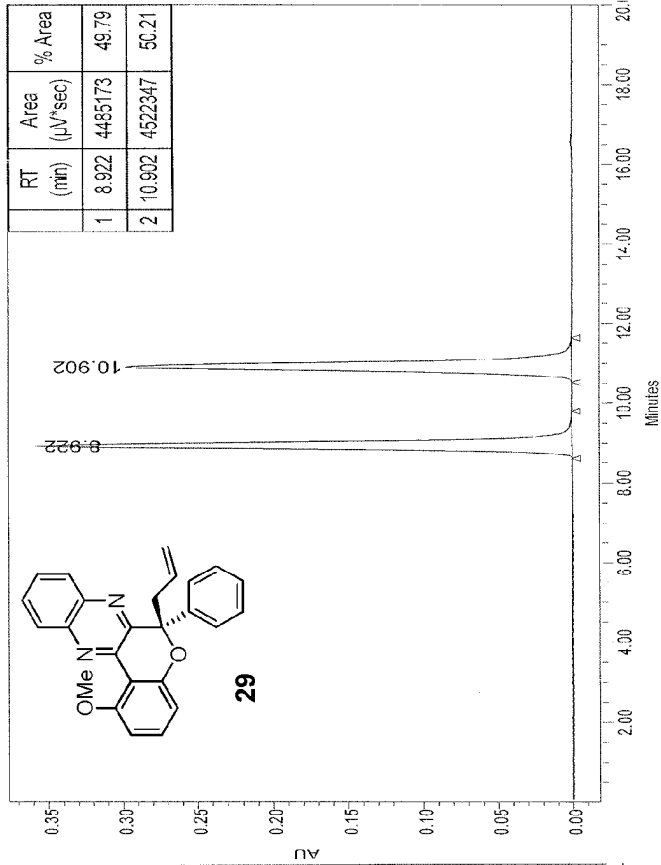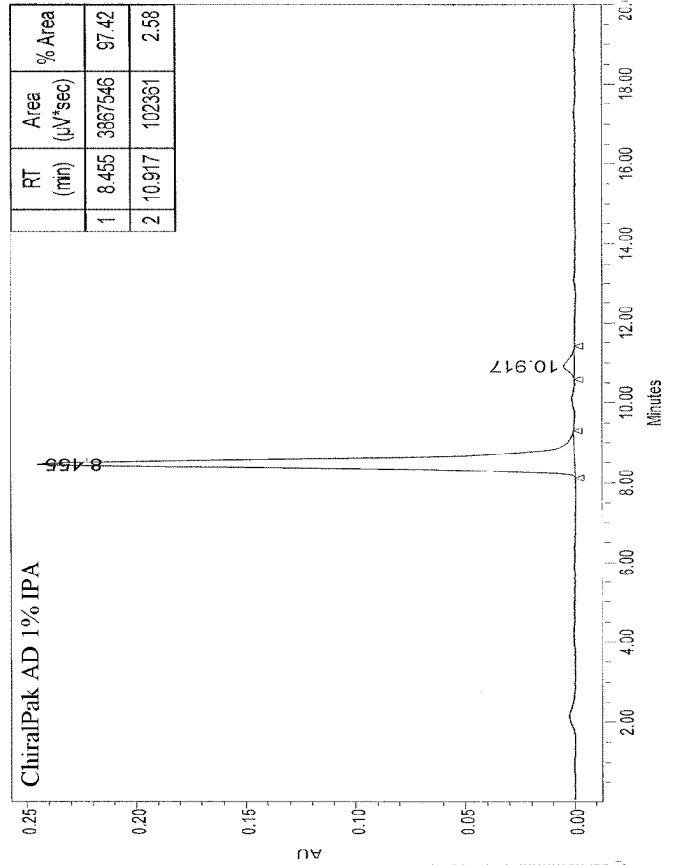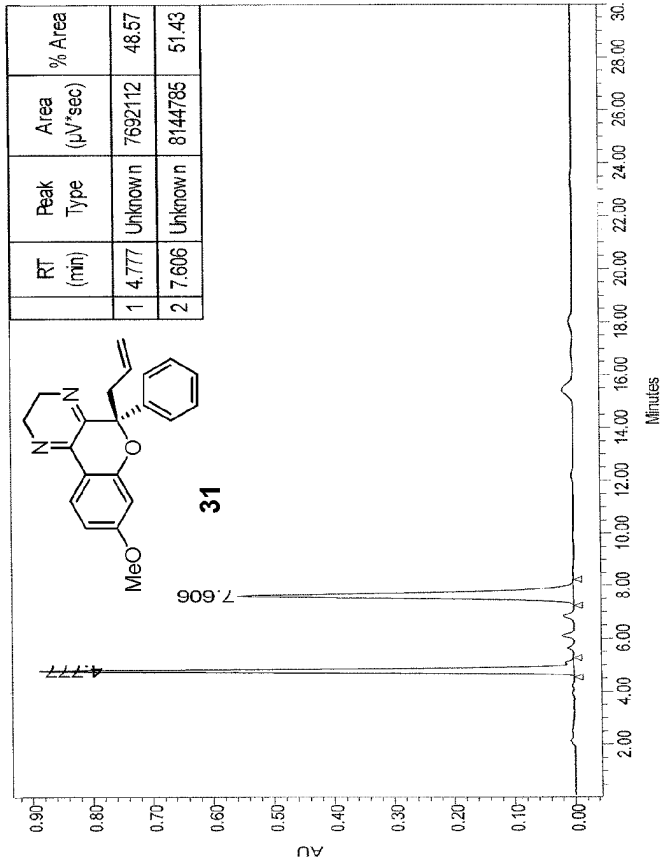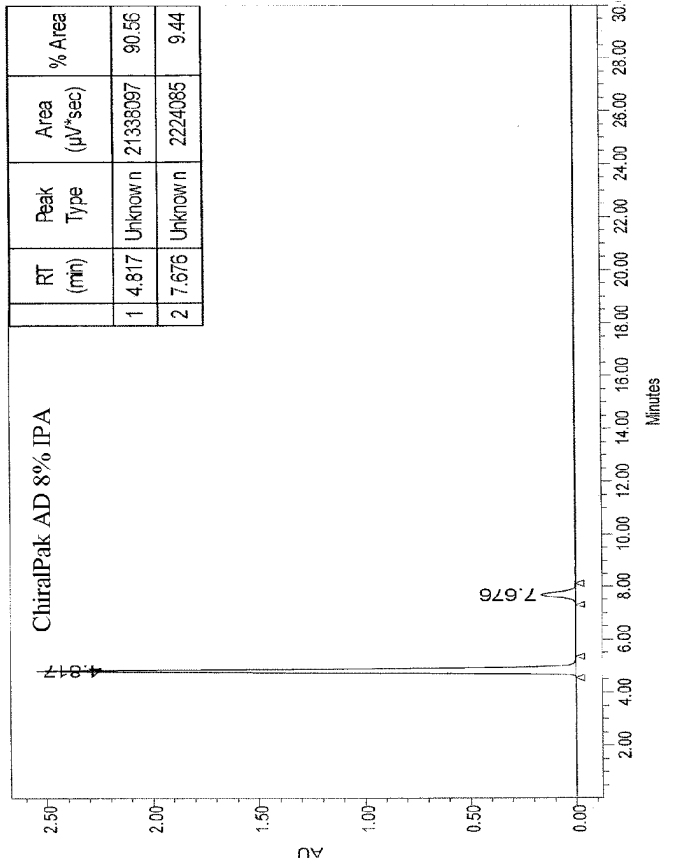

Supplement: NIHMS212299-supplement-1_si_001.pdf [file NIHMS212299-supplement-1_si_001.pdf]
